# Supplementary material for: DeepCSO: A Deep-Learning Network Approach to Predicting Cysteine S-Sulphenylation Sites
Source: Front Cell Dev Biol. 2020 Dec 1;8:594587. doi: 10.3389/fcell.2020.594587 (PMC7736615; doi:10.3389/fcell.2020.594587)
Supplement: Supplementary file 1 [file Table_1.XLSX]

## Sheet: Sheet1
Table S6. The predicted CSO sites using DeepCSO in the human proteome with annotation of multiple Cysteine modification sites reported in the literature.
Uniprot ID	position	sequence window	Prediction score	Carbonylation	Oxidation	Succination	Sulfenylation
sp|Q9H9K5|MER34_HUMAN	249	QNQTKGLLYQLFRNLFCSYGLTEAHGKWRCADA	0.274076
sp|Q9H9K5|MER34_HUMAN	437	RKDHVLDIPTTQRQTACGTVGKQCCLYINYSEE	0.494446
sp|P04439|HLAA_HUMAN	283	KWAAVVVPSGEEQRYTCHVQHEGLPKPLTLRWE	0.449993		oxidation		SOH
sp|P04439|HLAA_HUMAN	363	AASSDSAQGSDVSLTACKV**************	0.362123		oxidation		SOH
sp|P01889|HLAB_HUMAN	188	EAAREAEQRRAYLEGECVEWLRRYLENGKDKLE	0.248812
sp|P01889|HLAB_HUMAN	283	KWAAVVVPSGEEQRYTCHVQHEGLPKPLTLRWE	0.449993		oxidation		SOH
sp|P31689|DNJA1_HUMAN	302	VITSHPGQIVKHGDIKCVLNEGMPIYRRPYEKG	0.309807
sp|P31689|DNJA1_HUMAN	394	GEAYEDDEHHPRGGVQCQTS*************	0.448976
sp|P08246|ELNE_HUMAN	187	ELNVTVVTSLCRRSNVCTLVRGRQAGVCFGDSG	0.459351				SOH
sp|P08246|ELNE_HUMAN	254	FVNWIDSIIQRSEDNPCPHPRDPDPASRTH***	0.536386
sp|P01911|DRB_HUMAN	3	**************MVCLKLPGGSCMTALTVTL	0.502221
sp|P01911|DRB_HUMAN	44	LSGDTRPRFLWQPKRECHFFNGTERVRFLDRYF	0.440994
sp|P10144|GRAB_HUMAN	142	PLRLPSNKAQVKPGQTCSVAGWGQTAPLGKHSH	0.375684
sp|P10144|GRAB_HUMAN	173	SHTLQEVKMTVQEDRKCESDLRHYYDSTIELCV	0.302334
sp|P10144|GRAB_HUMAN	209	EIKKTSFKGDSGGPLVCNKVAQGIVSYGRNNGM	0.577837
sp|P10144|GRAB_HUMAN	230	QGIVSYGRNNGMPPRACTKVSSFVHWIKKTMKR	0.374572
sp|P63244|RACK1_HUMAN	182	VSCGWDKLVKVWNLANCKLKTNHIGHTGYLNTV	0.311269		oxidation		SOH
sp|P10321|HLAC_HUMAN	125	YNQSEDGSHTLQRMSGCDLGPDGRLLRGYDQSA	0.288845
sp|P25685|DNJB1_HUMAN	179	PVTHDLRVSLEEIYSGCTKKMKISHKRLNPDGK	0.27465
sp|O60271|JIP4_HUMAN	443	LNIVKNDLIAKVDELTCEKDVLQGELEAVKQAK	0.492855				SOH
sp|O60271|JIP4_HUMAN	689	VYLRPLDEKDTSMKLWCAVGVNLSGGKTRDGGS	0.254159
sp|O60271|JIP4_HUMAN	993	QNGCLYVHSSVAQWRKCLHSIKLKDSILSIVHV	0.345015
sp|Q6P2E9|EDC4_HUMAN	4	*************MASCASIDIEDATQHLRDIL	0.496709
sp|Q6P2E9|EDC4_HUMAN	510	GAGAMESAAGVLIKLFCVHTKALQDVQIRFQPQ	0.254398
sp|Q6P2E9|EDC4_HUMAN	838	PDSQVWPTAPDITRETCSTLAESPRNGLQEKHK	0.42762				SOH
sp|Q6P2E9|EDC4_HUMAN	1054	RLERSIRDEIKKTVPPCVSRSLEPMAGQLSNSV	0.533658
sp|Q05086|UBE3A_HUMAN	7	**********MEKLHQCYWKSGEPQSDDIEASR	0.322984
sp|Q05086|UBE3A_HUMAN	83	AAAIKALELYKINAKLCDPHPSKKGASSAYLEN	0.511687
sp|Q05086|UBE3A_HUMAN	108	ASSAYLENSKGAPNNSCSEIKMNKKGARIDFKD	0.60927
sp|Q05086|UBE3A_HUMAN	198	QAKDEDKDEDEKEKAACSAAAMEEDSEASSSRI	0.457179			succination
sp|Q05086|UBE3A_HUMAN	374	SRNLVNDDDAIVAASKCLKMVYYANVVGGEVDT	0.3991
sp|Q05086|UBE3A_HUMAN	439	PRVDPLETELGVKTLDCRKPLIPFEEFINEPLN	0.250522
sp|Q05086|UBE3A_HUMAN	760	SPLKYLFRPEEIELLICGSRNLDFQALEETTEY	0.337269
sp|P61916|NPC2_HUMAN	47	DGVIKEVNVSPCPTQPCQLSKGQSYSVNVTFTS	0.334039
sp|P61916|NPC2_HUMAN	99	VPFPIPEPDGCKSGINCPIQKDKTYSYLNKLPV	0.34602
sp|Q9NYL2|M3K20_HUMAN	150	LKSRNVVIAADGVLKICDFGASRFHNHTTHMSL	0.408413
sp|Q9NYL2|M3K20_HUMAN	231	AWLVVEKNERLTIPSSCPRSFAELLHQCWEADA	0.400679
sp|Q9NYL2|M3K20_HUMAN	455	ELVFGFHLKPGTGPQDCKWKMYMEMDGDEIAIT	0.281353
sp|Q9NYL2|M3K20_HUMAN	512	VMEKWIVGIAKSQTVECTVTYESDVRTPKSTKH	0.370932
sp|P29320|EPHA3_HUMAN	106	NSAQKIYVELKFTLRDCNSIPLVLGTCKETFNL	0.288189
sp|P29320|EPHA3_HUMAN	202	VGACVALVSVRVYFKKCPFTVKNLAMFPDTVPM	0.477688
sp|P29320|EPHA3_HUMAN	230	DTVPMDSQSLVEVRGSCVNNSKEEDPPRMYCST	0.501617
sp|P29320|EPHA3_HUMAN	322	CENNYFRADKDPPSMACTRPPSSPRNVISNINE	0.411019
sp|P29320|EPHA3_HUMAN	636	NISIDKVVGAGEFGEVCSGRLKLPSKKEISVAI	0.444461
sp|P29320|EPHA3_HUMAN	760	HRDLAARNILINSNLVCKVSDFGLSRVLEDDPE	0.545861
sp|O95905|ECD_HUMAN	211	IRGYPEKIQASLHRAHCFLPAGIVAVLKQRPRL	0.257128
sp|Q9UDY4|DNJB4_HUMAN	7	**********MGKDYYCILGIEKGASDEDIKKA	0.385953
sp|Q9UDY4|DNJB4_HUMAN	175	PVIHELRVSLEEIYSGCTKRMKISRKRLNADGR	0.284342
sp|P15822|ZEP1_HUMAN	217	KAMEPELSTLSQKGSPCAIKTEKLRPNKTARSP	0.429899
sp|P15822|ZEP1_HUMAN	982	NRYRKLENFENHKKFYCSELHGPKTKVAMREPE	0.447184
sp|P15822|ZEP1_HUMAN	1251	PEILVTEEPDRDLEAQCHDQEKSEKFSWPQRSE	0.359293
sp|P15822|ZEP1_HUMAN	1555	KPDKNSVLSGSSKSEDCFAPKYQLHCQVFTSGP	0.483154
sp|P15822|ZEP1_HUMAN	1773	AMEKHQKRAKDENGAVCATDVRPLEALSSRVNE	0.556727
sp|P15822|ZEP1_HUMAN	1803	VNEASKQKKPILVRQVCTTEPLDGVMLEKDVFS	0.373783
sp|P15822|ZEP1_HUMAN	1888	RSSPAPSENTHISPLKCTDNNQERKSPGVKNQG	0.432087
sp|P15822|ZEP1_HUMAN	2001	ALALLNSKQNTGKSLYCQAITTHSKSDLLVYSS	0.401971
sp|P15822|ZEP1_HUMAN	2579	VDAQGAPEMPASQSKACETQPKQTSVASANQVS	0.327772
sp|O95273|CCDB1_HUMAN	89	VFSQLPLPSPQETQKFCEQVHAAIKAFIAVYYL	0.31114
sp|Q6FHJ7|SFRP4_HUMAN	24	ALCLWLHLALGVRGAPCEAVRIPMCRHMPWNIT	0.30333
sp|Q6FHJ7|SFRP4_HUMAN	211	YSYVIHAKIKAVQRSGCNEVTTVVDVKEIFKSS	0.539917
sp|P22897|MRC1_HUMAN	74	FRWVSESQIMSVAFKLCLGVPSKTDWVAITLYA	0.341023
sp|P22897|MRC1_HUMAN	149	SGLWSRWKIYGTTDNLCSRGYEAMYTLLGNANG	0.274125
sp|P22897|MRC1_HUMAN	316	YLNWLPGSPSAEPGKSCVSLNPGKNAKWENLEC	0.497756
sp|P22897|MRC1_HUMAN	463	KWLRGEPSHENNRQEDCVVMKGKDGYWADRGCE	0.332003
sp|P22897|MRC1_HUMAN	600	VRFTHWNSDMPGRKPGCVAMRTGIAGGLWDVLK	0.666105
sp|P22897|MRC1_HUMAN	646	EGVTHPPKPTTTPEPKCPEDWGASSRTSLCFKL	0.466317
sp|P22897|MRC1_HUMAN	977	GFMEEERKNWQEARKACIGFGGNLVSIQNEKEQ	0.37512
sp|P22897|MRC1_HUMAN	1079	AGKWMDDTCDSKRGYICQTRSDPSLTNPPATIQ	0.301925
sp|Q12802|AKP13_HUMAN	73	TIAPGHDCCETVKVQLCASKEGLPVFVVAEEDF	0.256183
sp|Q12802|AKP13_HUMAN	418	QSLPDCGVKGTEGLSSCGNRNEETGTKSSGMPT	0.345372
sp|Q12802|AKP13_HUMAN	536	DVHVTSKPVDKISVPNCAPAASSLDGNKPAESS	0.504534
sp|Q12802|AKP13_HUMAN	653	TNSSHAQSQKGKSSPICSTTGDDKLCADSACQQ	0.596187
sp|Q12802|AKP13_HUMAN	732	TVTSDPVRDTQERADFCPFKVVDNKGQRKDVKL	0.449617
sp|Q12802|AKP13_HUMAN	934	SESSAAQEQDKDKAVTCSSIKENALSSGTLQEE	0.446865
sp|Q12802|AKP13_HUMAN	972	PGQDTQQFHEKSISADCAKDKALQLSNSPGASS	0.303362
sp|Q12802|AKP13_HUMAN	1232	MRAPPSGRERSTPSLPCMVSAQDAPLPKGADLI	0.288204
sp|Q12802|AKP13_HUMAN	2101	FSGENAERLKKTYGKFCGQHNQSVNYFKDLYAK	0.411561
sp|Q12802|AKP13_HUMAN	2142	KKKMSSSVVRRLGIPECILLVTQRITKYPVLFQ	0.350436
sp|Q6G461|ACPS_BARHE	59	QKKSSSYAKRFAAKEACAKALGTGIACGINWKD	0.492919
sp|Q6G461|ACPS_BARHE	69	FAAKEACAKALGTGIACGINWKDMGVINLPSGK	0.388374
sp|Q8N7X0|ADGB_HUMAN	465	LSHICSHPVLVTRSRSCPLVAPPKPPPLPPWKL	0.325099
sp|Q8N7X0|ADGB_HUMAN	655	CVCFQNIYIFHKPSSYCLNFQKSEFKFSEERVS	0.304848
sp|Q8N7X0|ADGB_HUMAN	894	SSLEEVSLVEWLDVKYCMPTSDKEYSAEEVAAA	0.369976
sp|Q8N7X0|ADGB_HUMAN	1093	ASRWKLRLIGSSAPLPCLSRDSPCNSFAIKEIR	0.347994
sp|Q8N7X0|ADGB_HUMAN	1100	LIGSSAPLPCLSRDSPCNSFAIKEIRDYYIPND	0.459938
sp|F1QGH6|AMER2_DANRE	7	**********MEVQTECSEPPPCDPQPPGKLNK	0.445952
sp|F1QGH6|AMER2_DANRE	357	GCMGRRLSGAGTNSERCSPAKPPLPPQVSSLAS	0.33798
sp|F1QGH6|AMER2_DANRE	568	PTKSAGDLKMNLPSPKCSSSATSSFRSMKGSTS	0.501348
sp|Q5T1N1|AKND1_HUMAN	64	IFIADDPQEKAMHSETCGNTAVTIPLGKITENA	0.289264
sp|Q5T1N1|AKND1_HUMAN	91	KITENAANKKDEKEKQCTAALHIPANEGDASKS	0.454839
sp|Q5T1N1|AKND1_HUMAN	154	NADSFEEEAIIKSIISCYNKNSWPKEQTPELTD	0.321642
sp|Q5T1N1|AKND1_HUMAN	311	KPTLVQDSLETTPESNCVEKQHQEQKGKITEPS	0.287991
sp|Q92667|AKAP1_HUMAN	64	LRADPAIKEPLPVEDVCPKVVSTPPSVTEPPEK	0.503207
sp|Q92667|AKAP1_HUMAN	102	SKLPAEPPALLQTHPPCRRSESSGILPNTTDMR	0.310449				SOH
sp|Q92667|AKAP1_HUMAN	147	LELALTGGEAKSIPLECPLSSPKGVLFSSKSAE	0.595255			succination
sp|Q92667|AKAP1_HUMAN	165	LSSPKGVLFSSKSAEVCKQDSPFSRVPRKVQPG	0.294448
sp|Q92667|AKAP1_HUMAN	376	TEQVLATTVGKVAGRVCQASQLQGQKEESCVPV	0.510194
sp|Q92667|AKAP1_HUMAN	389	GRVCQASQLQGQKEESCVPVHQKTVLGPDTAEP	0.390191
sp|Q92667|AKAP1_HUMAN	438	PGLPAEGSPPPKTYVSCLKSLLSSPTKDSKPNI	0.322531
sp|Q8K3E5|AHI1_MOUSE	109	KKVPVPTKPESSPSDVCDSAVEGEQKKEGTPED	0.448893
sp|Q8K3E5|AHI1_MOUSE	319	LSMDEIKNNSEVQNQECGFRKIAWAFLKLLGAN	0.628281
sp|Q8K3E5|AHI1_MOUSE	392	YPSTLYVTVRGLKVPDCIKPSYRSMMALQEERG	0.404323
sp|Q8K3E5|AHI1_MOUSE	445	EDSKEEVKWKRLPGQACRIPNKHLFSLNAGERG	0.33587
sp|Q8K3E5|AHI1_MOUSE	478	CFCLDFSHNGRILAAACASRDGYPIILYEIPSG	0.367734
sp|Q8K3E5|AHI1_MOUSE	844	QLVKQRLETVTEVIRSCAAKVNKNLSMTSPPPG	0.39272
sp|P14223|ALF_PLAFA	4	*************MAHCTEYMNAPKKLPADVAE	0.446754
sp|P14223|ALF_PLAFA	123	NIIPGIKVDKGLVNIPCTDEEKSTQGLDGLAER	0.618309
sp|P14223|ALF_PLAFA	140	TDEEKSTQGLDGLAERCKEYYKAGARFAKWRTV	0.325863
sp|P14223|ALF_PLAFA	185	LSIHETAWGLARYASICQQNRLVPIVEPEILAD	0.509002
sp|P14223|ALF_PLAFA	219	PHSIEVCAVVTQKVLSCVFKALQENGVLLEGAL	0.401337
sp|P14223|ALF_PLAFA	247	LEGALLKPNMVTAGYECTAKTTTQDVGFLTVRT	0.415374
sp|Q5VUY0|ADCL3_HUMAN	109	RFGTIPVKLYQPKASTCTLKPGIVYYHGGGGVM	0.551686
sp|Q5VUY0|ADCL3_HUMAN	166	GYRKLPKHKFPVPVRDCLVATIHFLKSLDAYGV	0.278393
sp|P62736|ACTA_HUMAN	2	***************MCEEEDSTALVCDNGSGL	0.331458
sp|P62736|ACTA_HUMAN	376	SKQEYDEAGPSIVHRKCF***************	0.460516
sp|Q9H553|ALG2_HUMAN	45	AERLVLDAALALQARGCSVKIWTAHYDPGHCFA	0.414214
sp|Q9H553|ALG2_HUMAN	89	DWLPRGLGWGGRGAAVCAYVRMVFLALYVLFLA	0.322993
sp|P0C7M7|ACSM4_HUMAN	109	ELGSLSRKAANVLTKPCGLQRGDRLAVILPRIP	0.538642
sp|P0C7M7|ACSM4_HUMAN	430	GKEGEIALRLKPTRPFCFFSKYVDNPQKTAATI	0.343052
sp|Q5TGY3|AHDC1_HUMAN	16	*MRVKPQGLVVTSSAVCSSPDYLREPKYYPGGP	0.398918
sp|Q5TGY3|AHDC1_HUMAN	97	DDPLPPRAARPVSQARCPTPVGDGSSSRRCWDN	0.514959
sp|Q5TGY3|AHDC1_HUMAN	357	LDVPGRRLEPQQPLGHCPLAEPLRLDLCSPHGP	0.465453
sp|Q5TGY3|AHDC1_HUMAN	368	QPLGHCPLAEPLRLDLCSPHGPPGPEGHPKYAL	0.293205
sp|Q5TGY3|AHDC1_HUMAN	689	GGFGGRGGGHAAKSARCSFSDFFEGIGKKKKVV	0.299532
sp|Q5TGY3|AHDC1_HUMAN	791	GWAPHHGHPGGQAGRNCGFQGTEARAFASTGLE	0.482513
sp|Q5TGY3|AHDC1_HUMAN	938	PPGRAASYGLTPAASDCRAAETFPKLVPPPSAM	0.433071
sp|Q5TGY3|AHDC1_HUMAN	992	AGQSVFAPTKPFTGQDCANSKDCSFAYGSGNSL	0.467739
sp|Q5TGY3|AHDC1_HUMAN	1029	SSAHSAGYAPPPTGGPCLPPSKASFFSSSEGAP	0.347454
sp|Q5TGY3|AHDC1_HUMAN	1280	RSTGPRQPRGGRGGGACSAKKERGGAAAKAKFI	0.410992
sp|Q5TGY3|AHDC1_HUMAN	1402	PPTVFDAGLQKAYSPTCSPTLGFKEELRPPPTK	0.418407
sp|Q5TGY3|AHDC1_HUMAN	1422	LGFKEELRPPPTKLAACEPLKHGLQGASLGHAA	0.562797
sp|Q5TGY3|AHDC1_HUMAN	1499	VGTGLLADFLGRTEAACLSAPHLASPPATPKAD	0.349082
sp|Q75V66|ANO5_HUMAN	224	FPSSSRNRIVYYILSRCPFGIEDGKKRFGIERL	0.403873
sp|Q5PCG0|ALLB_SALPA	236	EVEAIRRVLYLAKAAGCRLHVCHISSPEGVEEV	0.27353
sp|Q96JD6|AKCL2_HUMAN	84	TKLWCTCHKKSLVETACRKSLKALKLNYLDLYL	0.288295
sp|Q96JD6|AKCL2_HUMAN	197	LNKPGLRFKPLTNQIECHPYLTQKNLISFCQSR	0.46929
sp|Q96JD6|AKCL2_HUMAN	210	QIECHPYLTQKNLISFCQSRDVSVTAYRPLGGS	0.312225
sp|Q96JD6|AKCL2_HUMAN	227	QSRDVSVTAYRPLGGSCEGVDLIDNPVIKRIAK	0.362775
sp|A1AJF5|ARCA_ECOK1	397	LPIPGDELGRGRGGARCMSCPLHRDGI******	0.277832
sp|A1AJF5|ARCA_ECOK1	400	PGDELGRGRGGARCMSCPLHRDGI*********	0.272951
sp|P55056|APOC4_HUMAN	116	WFLESKDSLLKKTHSLCPRLVCGDKDQG*****	0.282851
sp|P55056|APOC4_HUMAN	121	KDSLLKKTHSLCPRLVCGDKDQG**********	0.302737
sp|A6QTX7|ATG18_AJECN	170	KLEAINVVEAHKSPLSCLAINTEGTLLATASDK	0.29778
sp|A7ZDF2|ASSY_CAMC1	277	RLDIVENRSVGMKSRGCYETPGGTIMLKAHRAI	0.378063
sp|Q1E702|ATG2_COCIM	64	NVGLKLEKLSAHLPPYCTLTKGSVSLLRVTVPA	0.46762
sp|Q1E702|ATG2_COCIM	314	PLRPRSPQPSSSGSDSCGDMSRSTILDPSSMYG	0.267492
sp|Q1E702|ATG2_COCIM	415	SQFDDHLEDSTIFPKDCPSTPVRDQTPRPHVSK	0.329638
sp|Q1E702|ATG2_COCIM	474	DNEPDSATSARGKTPDCQTEQESPSTSKICPAV	0.533708
sp|Q1E702|ATG2_COCIM	760	ASEESSPSFFRLNLTSCSLKFLERVPAQPYPLS	0.256292
sp|Q1E702|ATG2_COCIM	916	LGSSIASASTVKGEQPCSPPRPRRGVHFADPVP	0.552417
sp|Q1E702|ATG2_COCIM	948	PPSSPSTTNHAALKANCRIGGIVLRVIGEHCTV	0.31967
sp|Q1E702|ATG2_COCIM	1275	DDRSAMLPRLSVGMKDCGIGLNPRKSPAKALVI	0.450524
sp|Q9ULK2|AT7L1_HUMAN	10	*******MTSERSRIPCLSAAAAEGTGKKQQEG	0.541863
sp|Q9ULK2|AT7L1_HUMAN	58	FLGKPWSSWIDAAKLHCSDNVDLEEAGKEGGKS	0.283369
sp|Q9ULK2|AT7L1_HUMAN	151	PASNPRTSLVQVKTKACLSGHHSASSTSKPFKT	0.513246
sp|Q9ULK2|AT7L1_HUMAN	193	SKQHTVFPAKGSRDKPCVPVPVVSLEKIPNLVK	0.529098
sp|Q9ULK2|AT7L1_HUMAN	297	KPYRRLSEREFDPNKHCGVLDPETKKPCTRSLT	0.379266
sp|Q99700|ATX2_HUMAN	76	PGPPPSRQSSPPSASDCFGSNGNGGGAFRPGSR	0.285218
sp|Q99700|ATX2_HUMAN	147	ASPPRSGVSLARPAPGCPRPACEPVYGPLTMSL	0.48839
sp|Q99700|ATX2_HUMAN	152	SGVSLARPAPGCPRPACEPVYGPLTMSLKPQQQ	0.255407
sp|Q99700|ATX2_HUMAN	280	ANMRMVHILTSVVGSKCEVQVKNGGIYEGVFKT	0.428378
sp|Q99700|ATX2_HUMAN	301	KNGGIYEGVFKTYSPKCDLVLDAAHEKSTESSS	0.319893
sp|Q99700|ATX2_HUMAN	556	GSDQRVVNGGVPWPSPCPSPSSRPPSRYQSGPN	0.419647
sp|Q99700|ATX2_HUMAN	852	IEPSAKDSFIENSSSNCTSGSSKPNSPSISPSI	0.264296
sp|Q99700|ATX2_HUMAN	892	RGPEVTSQGVQTSSPACKQEKDDKEEKKDAAEQ	0.40392		oxidation		SOH
sp|O75882|ATRN_HUMAN	101	AAAAAVSGSAAAEAKECDRPCVNGGRCNPGTGQ	0.274268
sp|O75882|ATRN_HUMAN	158	SGFVTDGPGNYKYKTKCTWLIEGQPNRIMRLRF	0.29017
sp|O75882|ATRN_HUMAN	657	LVFTSEQCDAHRSEAACLAAGPGIRCVWNTGSS	0.272473
sp|O75882|ATRN_HUMAN	1016	PGCGWCTDPSNTGKGKCIEGSYKGPVKMPSQAP	0.282114
sp|O75882|ATRN_HUMAN	1307	LSLLLVAAVVWKIKQSCWASRRREQLLREMQQM	0.297218
sp|O75882|ATRN_HUMAN	1361	IGGSIKTVPKPIALEPCFGNKAAVLSVFVRLPR	0.599413
sp|O75882|ATRN_HUMAN	1428	GAVRNRKQQPPAQPGTCI***************	0.448512
sp|Q6ZP68|ATPUN_HUMAN	9	********MNSPEARLCVAQCRDSYPGCQPLKD	0.293302
sp|Q6ZP68|ATPUN_HUMAN	20	PEARLCVAQCRDSYPGCQPLKDTRAWASSLKMD	0.264868
sp|Q5PKX0|ATPA_SALPA	193	ALAIDAIINQRDSGIKCIYVAIGQKASTISNVV	0.315305
sp|P0CO44|BBP_CRYNJ	326	ELHCLITADDESKVKTCVALINKVIETAASTPE	0.518222
sp|P0CO44|BBP_CRYNJ	383	NQLCQNCGEKGHRRWECPQQRVYSANVICRICG	0.251763
sp|P56945|BCAR1_HUMAN	582	RGGSGATLEDLDRLVACSRAVPEDAKQLASFLH	0.319776
sp|P56945|BCAR1_HUMAN	820	KAADVRSQVTHYSNLLCDLLRGIVATTKAAALQ	0.247321
sp|Q9HBH7|BEX1_HUMAN	44	ANKGEPLALPLDAGEYCVPRGNRRRFRVRQPIL	0.337423
sp|Q04906|BMP6_RAT	255	PEGEAVTAAEFRVYKDCVVGSFKNQTFLISIYQ	0.575463
sp|Q04906|BMP6_RAT	470	VQTLVHLMNPEYVPKPCCAPTKLNAISVLYFDD	0.485805
sp|Q04906|BMP6_RAT	471	QTLVHLMNPEYVPKPCCAPTKLNAISVLYFDDN	0.472945
sp|Q04906|BMP6_RAT	503	NSNVILKKYRNMVVRACGCH*************	0.35441
sp|Q04906|BMP6_RAT	505	NVILKKYRNMVVRACGCH***************	0.331071
sp|Q6ZU67|BEND4_HUMAN	104	PGPGRAAAAASSSSPSCTPATSQGHLRTPAQPP	0.422006
sp|Q6ZU67|BEND4_HUMAN	354	QENEELRRKLESIPVPCQTVLDYLKMVLQHHNQ	0.438469
sp|Q6ZU67|BEND4_HUMAN	460	GETGPERRPLDPVKVTCLREFIRMHCTSNPDWW	0.29774
sp|P83606|BMTI6_RHIMP	7	**********VDFETYCKPTYDSGPCKGYFPRW	0.539063
sp|Q8TDH9|BL1S5_HUMAN	12	*****MSGGGTETPVGCEAAPGGGSKKRDSLGT	0.543753
sp|O35914|BNC1_MOUSE	181	VPPTTANVDIRAFIESCGHRSASLPTPVDKGSP	0.256139
sp|P03218|BILF2_EBVB9	40	KFENVTAHAGARVNLTCSVPSNESVSRIELGRG	0.535235
sp|Q9ZLN3|BIOF_HELPJ	55	KKDLLQNAFDKLQSFDCHSPKASMLVNGYHPLH	0.35973
sp|Q9BQP9|BPIA3_HUMAN	3	**************MMCPLWRLLIFLGLLALPL	0.397269
sp|Q8WNE9|BAALC_PIG	3	**************MGCGGSRADAIEPRYYESW	0.556534
sp|Q8WNE9|BAALC_PIG	143	TESIRQVDRNQRITKKCIN**************	0.414496
sp|P0C734|BTRF1_EBVG	4	*************MLKCKQPGARFIHGAVHLPS	0.508419
sp|A9ULR9|BACD1_DANRE	132	VLKEAQYYRLQGLVQHCLSTLQKRRDVCRGCHI	0.302307
sp|A9ULR9|BACD1_DANRE	164	IPMITSAKEEQRMIATCRKPVVKLQNNRGNNKY	0.264891
sp|Q9H3F6|BACD3_HUMAN	138	EECQAALQNKDTYEPFCKVPVITSSKEEQKLIA	0.374346
sp|Q95153|BRCA1_CANLF	196	ELGSDSSEDTVNKASSCSVGDDELEITSQGARA	0.309758
sp|Q95153|BRCA1_CANLF	302	SLLLTKHRMNVEKAEICNNSKQPGLARSQQSRW	0.471469
sp|Q95153|BRCA1_CANLF	325	GLARSQQSRWAESKETCNDRQIPSTEKKVVVNA	0.252469
sp|Q95153|BRCA1_CANLF	345	QIPSTEKKVVVNADLLCGRKELNKQKPPHSDSP	0.323755
sp|Q95153|BRCA1_CANLF	619	APKKNRLRRKSSARHTCALEFVVNRNLNPPDHS	0.251537
sp|Q95153|BRCA1_CANLF	719	VSGFFANYSSSSKPQECINPGLRREEIEESRRM	0.450688
sp|Q95153|BRCA1_CANLF	803	DTLRKAKTVSNQQANLCATIENPKEPIHGCSKD	0.605186
sp|Q95153|BRCA1_CANLF	833	SKDTRNDTEGFVVPLTCKDNHTQETSIEMEESE	0.269107
sp|Q95153|BRCA1_CANLF	901	PRSGAFGKQGPKVTLECGQKEESQGKKESEIRH	0.416188
sp|Q95153|BRCA1_CANLF	943	FSAVSQKAKKPGDFAKCSIKGVSRLCLSSQFKG	0.306192
sp|Q95153|BRCA1_CANLF	1094	PKLNAMLRLGLMQPEVCKQSLSLSNCKHPEMKW	0.250581
sp|Q95153|BRCA1_CANLF	1147	SDNPEQPMGSSRSSQVCSETPDDLLNGDKIKGK	0.364736
sp|Q95153|BRCA1_CANLF	1525	TRWYVHSCPRSLQDTNCPSQKELTKVVSMEEQQ	0.382931
sp|Q95153|BRCA1_CANLF	1700	SEETTHVIMKTDAEFVCERTLKYFLGIAGGKWV	0.373232
sp|Q95153|BRCA1_CANLF	1877	YLIPQIPRTAADSSQPCV***************	0.40652
sp|Q9GKK8|BRCA1_PANTR	305	SLLLTKDRMNVEKAEFCNKSKQPGLARSQHNRW	0.272322
sp|Q9GKK8|BRCA1_PANTR	348	RTPSTEKKVDLNADPLCERKEWNKQKLPCSENP	0.258926
sp|Q9GKK8|BRCA1_PANTR	360	ADPLCERKEWNKQKLPCSENPRDTEDVPWITLN	0.518051
sp|Q9GKK8|BRCA1_PANTR	712	TFPELKLTNAPGSFTNCSNTSELKEFVNPSLPR	0.432693
sp|Q9GKK8|BRCA1_PANTR	801	LLEVSTLGKAKTEPNKCVSQCAAFENPKGLIHG	0.347102
sp|Q9GKK8|BRCA1_PANTR	805	STLGKAKTEPNKCVSQCAAFENPKGLIHGCSKD	0.343215
sp|Q9GKK8|BRCA1_PANTR	933	IKPVQTVNITAGFPVVCQKDKPVDYAKCSIKGG	0.490207
sp|Q9GKK8|BRCA1_PANTR	1103	GVLQPEVYKQSLPGSNCKHPEIKKQEYEEVVQT	0.379877
sp|Q9GKK8|BRCA1_PANTR	1251	SNIPSQSTRHSTVATECLSKNTEENLLSLKNSL	0.3715
sp|Q9GKK8|BRCA1_PANTR	1270	KNTEENLLSLKNSLNDCSNQVILAKASQEHHLS	0.3917
sp|Q9GKK8|BRCA1_PANTR	1501	TSKNKEPGVERSSPSKCPSLDDRWYMHSCSGSL	0.399052
sp|Q9GKK8|BRCA1_PANTR	1697	TEETTHVVMKTDAEFVCERTLKYFLGIAGGKWV	0.386277
sp|Q4V8S9|BORC7_DANRE	25	RFGQSVKGLLSDKVTSCSGDVIALTRQVLKGSR	0.419962
sp|Q8TDN6|BRX1_HUMAN	52	AEEVEEEERDRIPGPVCKGKWKNKERILIFSSR	0.359945				SOH
sp|P53958|BOP3_YEAST	369	SVREGRQVHDDLDDRTCSESSSRNESPVRTITK	0.253696
sp|O95816|BAG2_HUMAN	162	VPHGPVDQKFQSIVIGCALEDQKKIKRRLETLL	0.308629				SOH
sp|O57167|C10_VACCA	214	LVDVETIGVIVNRSGKCLLVNNHLGIGIVKDKR	0.252556
sp|A2RUR9|C144A_HUMAN	258	NKQPQKTSQEPEMAKDCDREDIPIYPVLPHVQK	0.316832
sp|A2RUR9|C144A_HUMAN	314	LKQRFGEIYEKYKIPACPEEEPLLDNSTRGTDV	0.484557
sp|A2RUR9|C144A_HUMAN	403	VCQSSSKFHLHENKLDCDNDNKPGIGHIFSTDK	0.366319
sp|A2RUR9|C144A_HUMAN	656	DTFCLCEHLLKLKNNHCDQLTVKLKQMENMVSV	0.433104
sp|A2RUR9|C144A_HUMAN	927	IEMESYRCRLAAAVRDCDQSQTARDLKLDFQRT	0.248059
sp|A2RUR9|C144A_HUMAN	1012	ESLILERVQRDLSQTQCQKKETEQMYQIEQSKL	0.316697
sp|A2RUR9|C144A_HUMAN	1164	LQLQQTLFSMKAIQKQCETLQKNKKQLKQEVVN	0.379965
sp|A2RUR9|C144A_HUMAN	1334	RSLFTAYATRPVLESPCVGNLNDSEGLNRKHIP	0.378723
sp|O43286|B4GT5_HUMAN	158	SKDPTIKLGGHWKPSDCMPRWKVAILIPFRNRH	0.275222
sp|O43286|B4GT5_HUMAN	248	FHDVDHIPESDRNYYGCGQMPRHFATKLDKYMY	0.409322
sp|Q86Y30|BAGE2_HUMAN	81	LVLQEPTAFRISVTSSCFVQNTLTKLLKDRRKM	0.296736
sp|Q86Y30|BAGE2_HUMAN	102	TLTKLLKDRRKMQTVQCATARETS*********	0.535839
sp|P33800|B1_VAR67	83	EEWKKSHHISHVGVITCKAFGLYKSINTEYRFL	0.338695
sp|P33800|B1_VAR67	240	WLGGILPWTKIAETKNCALVSATKQKYVNNTTT	0.530789
sp|Q8WUZ0|BCL7C_HUMAN	211	QGDTEDSEGAPPLKRICPNAPDP**********	0.451521
sp|O60512|B4GT3_HUMAN	119	ERNPRVEPGGRYRPAGCEPRSRTAIIVPHRARE	0.380306
sp|Q9ZMU4|BCP_HELPJ	46	HKKVVLYFYPKDNTPGCTLEAKDFSALFSEFEK	0.725172
sp|Q9ZMU4|BCP_HELPJ	135	IIRSTFIINTQGVLEKCFYNVKAKGHAQKVLES	0.375325
sp|P42575|CASP2_HUMAN	30	HKELMAADRGRRILGVCGMHPHHQETLKKNRVV	0.392451
sp|P42575|CASP2_HUMAN	173	STDTVEHSLDNKDGPVCLQVKPCTPEFYQTHFQ	0.465352
sp|P42575|CASP2_HUMAN	343	RGVDQQDGKNHAGSPGCEESDAGKEKLPKMRLP	0.542336
sp|Q95ND5|CASP3_PIG	264	ESFSTDSTFHAKKQIPCIVSMLTKELYFYH***	0.503047
sp|Q9H425|CA198_HUMAN	73	EWARLPPAQQDEIIDRCLVGPRAPAPRDPGDSE	0.388841
sp|Q9H425|CA198_HUMAN	228	PSQIKSMEKGEKVLPPCYRQEPAPKDREAKVER	0.48922
sp|Q6PHS9|CA2D2_MOUSE	8	*********MAVPARTCGASWPGPVRTARPWPG	0.551201
sp|Q6PHS9|CA2D2_MOUSE	30	GPVRTARPWPGRGPRPCPDPRGPASGPARPLLL	0.483272
sp|Q6PHS9|CA2D2_MOUSE	344	DYVNVASFNEKAQPVSCFTHLVQANVRNKKVFK	0.380859
sp|Q6PHS9|CA2D2_MOUSE	947	NNSFYTRKESYDYQAACAPQPPGNLGAAPRGVF	0.267249
sp|Q6PHS9|CA2D2_MOUSE	1016	ADPAEAEGSPETRESSCVMKQTQYYFGSVNASY	0.38326
sp|Q6PHS9|CA2D2_MOUSE	1065	RLTNTNLLFVVAEKPLCSQCEAGRLLQKETHSD	0.27105
sp|Q6PHS9|CA2D2_MOUSE	1086	AGRLLQKETHSDGPEQCELVQRPRYRRGPHICF	0.284235
sp|O60911|CATL2_HUMAN	169	RKTGKLVSLSEQNLVDCSRPQGNQGCNGGFMAR	0.343153
sp|O60911|CATL2_HUMAN	178	SEQNLVDCSRPQGNQGCNGGFMARAFQYVKENG	0.342134
sp|O60911|CATL2_HUMAN	270	HSSFQFYKSGIYFEPDCSSKNLDHGVLVVGYGF	0.249904
sp|O60911|CATL2_HUMAN	323	WGSNGYVKIAKDKNNHCGIATAASYPNV*****	0.347504
sp|Q8ND23|CARL3_HUMAN	19	KPSVELTRELQDSIRRCLSQGAVLQQHHVKLET	0.269575
sp|Q8ND23|CARL3_HUMAN	117	SVDQVTRHVSSALSKVCPGPGCLIRRGNADTPE	0.315469
sp|Q8ND23|CARL3_HUMAN	570	LKLRTSILINALGSNTCLAKVDLSGNGMEDIGA	0.431345
sp|Q8ND23|CARL3_HUMAN	872	LARHLTQLRTLSDPPGCPGQGQDLSSRGRGRNH	0.380742
sp|P36852|CAPSH_ADE08	150	VFYGGRALKKETKMKPCYGSFARPTNKKGGQAK	0.491695
sp|P36852|CAPSH_ADE08	371	NDKWKKDEKVAAQNQICKGNIYAMEINLQANLW	0.496078
sp|Q4AC94|C2CD3_HUMAN	58	KLTVNRVIWKIAKPPTCVLVRVRWWGETSDGTL	0.572957
sp|Q4AC94|C2CD3_HUMAN	242	AANSSRSTTPRGKDHVCFAENPDTIKDSSFGLQ	0.339027
sp|Q4AC94|C2CD3_HUMAN	304	EFQPQIRTVAKSHSDSCILSSNNLPTKDLLSAL	0.378154
sp|Q4AC94|C2CD3_HUMAN	724	TGINTKLSGNTHYTPLCAPTSPNKALPELNQDM	0.40074
sp|Q4AC94|C2CD3_HUMAN	742	PTSPNKALPELNQDMTCTKNPQNLNQIHEETAK	0.258244
sp|Q4AC94|C2CD3_HUMAN	828	PDGKDFISGESEKQSPCNVYLNCKLFSTEEVTR	0.456704
sp|Q4AC94|C2CD3_HUMAN	1137	VRDQKVAKGTLPLSRICAMVTTQHREDVGIQTF	0.363157
sp|Q4AC94|C2CD3_HUMAN	1207	VLAARTVSISVQIIRACGLQAAAKALAEREPAL	0.516013
sp|Q4AC94|C2CD3_HUMAN	1313	YHENTKSASDIISIESCKEYLLGVVKVPTKELL	0.433998
sp|Q4AC94|C2CD3_HUMAN	1435	HCVLLAGHNHIHKNTYCYLRYKFYDHEAFWTPL	0.260923
sp|Q4AC94|C2CD3_HUMAN	1602	PRRNDEVQLSPPEVISCHQKSPASTQVPCSSTT	0.26766
sp|Q4AC94|C2CD3_HUMAN	1614	EVISCHQKSPASTQVPCSSTTAEVRLTQEGPAD	0.370024
sp|Q4AC94|C2CD3_HUMAN	2112	EVISPQPDEVQREGPSCPSPGPFCREELMVKSS	0.401484
sp|Q8TAB5|CA216_HUMAN	131	SSSLSIDSRSSSPEPACGTPRGPGPPDPLLPSV	0.393723
sp|P0CK98|CCD39_DANRE	73	EHLKNLKQEVSHNQALCKAKEKETESEVHLKAL	0.38551
sp|P0CK98|CCD39_DANRE	424	EVQALRDKEKNVTAEICATRTALSNLDSKLRKL	0.494002
sp|P0CK98|CCD39_DANRE	514	AANLNKQLKKLQDDIRCIKKDTEKIGAEKTNLS	0.253951
sp|P0CK98|CCD39_DANRE	705	EKEIHALENTLQVVNNCNSTHRKALTKVTESSP	0.32462
sp|P0CK98|CCD39_DANRE	803	KDILSQEEKINRAVKQCAKYTKEIRSGKQSTEK	0.271433
sp|P0CK98|CCD39_DANRE	944	RGSQPSSAGSSRSSSKCKSP*************	0.316621
sp|Q99616|CCL13_HUMAN	58	KISLQRLKSYVITTSRCPQKAVIFRTKLGKEIC	0.367857
sp|Q99616|CCL13_HUMAN	74	CPQKAVIFRTKLGKEICADPKEKWVQNYMKHLG	0.574149
sp|A1A788|CAIB_ECOK1	286	GTPEIPEGTQLIHRIECPYGPLVEEKLDAWLAA	0.501935
sp|A1A788|CAIB_ECOK1	319	HTIAEVKERFAELNIACAKVLTVPELESNPQYV	0.40713
sp|Q8R1R5|C99L2_RAT	189	LLGAVSGYLSYQHRKFCFSVQRGLDAAYVKGEN	0.471072
sp|Q8R1R5|C99L2_RAT	211	GLDAAYVKGENLEAVVCEEPRVEAAMCEAPPVT	0.664774
sp|B8JMH0|CAF17_DANRE	150	QLLKVYKIRRKVNLSVCPSLSLWALLPHSKEAV	0.261165
sp|B8JMH0|CAF17_DANRE	257	LEANLVYMQGISFSKGCYIGQELTARTHHTGVI	0.310409
sp|Q16581|C3AR_HUMAN	468	GILEAAFSEELTRSTHCPSNNVISERNSTTV**	0.448611
sp|A0Q8A2|CCA_FRATN	238	ENPIYKDSNINEKITLCLLKVPQQKLDDIRKEL	0.439981
sp|A0Q8A2|CCA_FRATN	314	NLFAESLNLYKKYLKVCDTITPHRNYQLLQTTI	0.537964
sp|P43166|CAH7_HUMAN	180	DALYMVRFKGTKAQFSCFNPKCLLPASRHYWTY	0.365608
sp|P43166|CAH7_HUMAN	185	VRFKGTKAQFSCFNPKCLLPASRHYWTYPGSLT	0.306666
sp|P43166|CAH7_HUMAN	219	PPLSESVTWIVLREPICISERQMGKFRSLLFTS	0.286624
sp|Q8IYX3|CC116_HUMAN	4	*************MARCRHHSGYLADDEASHSM	0.357152
sp|Q8IYX3|CC116_HUMAN	52	MRPACKPGRVPHPPSTCGSSALQGQRRNKRHPQ	0.308332
sp|Q8IYX3|CC116_HUMAN	214	KRLLQLEREGKGLSQSCSQRDSLLWDSLGSQTS	0.325548
sp|A0A0R4IFG5|CFA53_DANRE	60	EATRGEVLEFTKDQSSCDVRMRWERNTQRRVVS	0.292311
sp|A0A0R4IFG5|CFA53_DANRE	177	SEELRAVQIKRRQDQVCTERESQIRTKEEVRRV	0.339629
sp|P61075|CDC2H_PLAF7	93	LVFEHLDQDLKKLLDVCEGGLESVTAKSFLLQL	0.298234
sp|O95319|CELF2_HUMAN	3	**************MRCPKSAVTMRNEELLLSN	0.522801
sp|O95319|CELF2_HUMAN	143	NAVEDRKLFIGMVSKKCNENDIRVMFSPFGQIE	0.601503
sp|O95319|CELF2_HUMAN	201	AQNAIKAMHQSQTMEGCSSPIVVKFADTQKDKE	0.266366
sp|Q2GH98|CH60_EHRCR	28	DKSIREVVRILEDAVGCTAGPKGLTVAIGKSYG	0.513776
sp|Q2GH98|CH60_EHRCR	91	QSASQCNDKVGDGTTTCSILTAKVIEEVSKAKA	0.380004
sp|Q2GH98|CH60_EHRCR	114	VIEEVSKAKAAGADIVCIKEGVLKAKEAVLEAL	0.500393
sp|Q2GH98|CH60_EHRCR	164	TISANGDKNIGSKIAQCVQEVGKDGVITVEESK	0.59523
sp|Q2GH98|CH60_EHRCR	467	APIKRIIKNSGSENAPCVIAHLLKQNDKELIFN	0.633293
sp|Q7TSG1|CE120_MOUSE	436	KGIGSVPASLAQPEATCGASEVVTSGQKIAVPA	0.294624
sp|Q7TSG1|CE120_MOUSE	640	GVPAVDQKPSSPPPAPCPSEIQMEPRETLEYKA	0.547165
sp|Q7TSG1|CE120_MOUSE	765	RNLQELQDSVRRARDDCVYQVELERLKLKQLEE	0.292184
sp|Q7TSG1|CE120_MOUSE	924	NELNRLRQQEQNQYQDCKEIASGKLGSPRGSGL	0.360032
sp|Q9Z0E2|CHRD_MOUSE	51	PIRSEKEPLPVRGAAGCSFGGKVYALDETWHPD	0.669371
sp|Q9Z0E2|CHRD_MOUSE	519	TKDFPDGELRGHVTALCYSGHSARYDRLPVPLA	0.349864
sp|Q9Z0E2|CHRD_MOUSE	647	SSPRGELRGQVHIASQCEAGGLRLASEGVQMPL	0.405324
sp|Q9Z0E2|CHRD_MOUSE	701	VPAKHGSPGRPRDPNTCFFEGQQRPHGARWAPN	0.352863
sp|Q9UPV0|CE164_HUMAN	282	KKDVSLDSDAAGPPTPCKPSSPGADSSLSSAVG	0.470675
sp|Q9UPV0|CE164_HUMAN	536	LQLSLQREQAPSPPAACEKGKEQHSQAEELGPG	0.463168
sp|Q9UPV0|CE164_HUMAN	626	LLESKQEKMQQLREKLCQEEEEEILRLHQQKEQ	0.322584
sp|Q9UPV0|CE164_HUMAN	778	AVATLEKEHSAELERLCSSLEAKHREVVSSLQK	0.450154
sp|Q9UPV0|CE164_HUMAN	810	KKIQEAQQKEEAQLQKCLGQVEHRVHQKSYHVA	0.487666
sp|O15519|CFLAR_HUMAN	393	GPAMKNVEFKAQKRGLCTVHREADFFWSLCTAD	0.60867
sp|Q6P3G4|CCSAP_DANRE	25	EYMKKFKDPKWDTYAKCYEDLLKYRLSRRLLEQ	0.319244
sp|Q6P3G4|CCSAP_DANRE	84	KVEPLKTLDEKPERSACVTPEPAAEAETQAAEV	0.314406
sp|Q6P3G4|CCSAP_DANRE	113	AAEVQDREHADTNLVPCDAEVAHPEGEEVRGKE	0.316817
sp|Q32Q52|CL074_HUMAN	8	*********MEKTESFCPEVPPQDCGASPRPSL	0.400539
sp|Q96LP6|CL042_HUMAN	6	***********MSTVICMKQREEEFLLTIRPFA	0.407388
sp|Q96LP6|CL042_HUMAN	53	SATLWDRSTPSAKHIPCYERTSVPCSRFINHMK	0.249572
sp|Q96LP6|CL042_HUMAN	331	LAGASTHFPSKRLIKVCSSAPPRPTRRFHTVCS	0.488342
sp|Q96LP6|CL042_HUMAN	346	VCSSAPPRPTRRFHTVCSQALSRPVVNAHLH**	0.381737
sp|P41002|CCNF_HUMAN	240	LLWESDRRTDVSDPGRCLHSFRKLRDYAAKGCW	0.290334
sp|P41002|CCNF_HUMAN	266	YAAKGCWEAQLSLAKACANANQLGLEVRASSEI	0.31645
sp|P41002|CCNF_HUMAN	496	FSYEDLIPCVLSLHKKCFHDDAPKDYRQVSLTA	0.371999
sp|Q6CTU5|CLP1_KLULA	77	VIVNIYAIERSMIEWKCLEELEPKVSENKSYHA	0.29703
sp|P51790|CLCN3_HUMAN	237	FAFLAVSLVKVFAPYACGSGIPEIKTILSGFII	0.302263
sp|P51790|CLCN3_HUMAN	733	ESARKKQEGIVGSSRVCFAQHTPSLPAESPRPL	0.300049
sp|P51790|CLCN3_HUMAN	783	PMEIVVDIFRKLGLRQCLVTHNGRLLGIITKKD	0.476931
sp|Q8NCH0|CHSTE_HUMAN	117	DLQVRQDVRNRTLRAVCGQPGMPRDPWDLPVGQ	0.518205
sp|Q8NCH0|CHSTE_HUMAN	341	QAWYRPASPESLHYHLCSAPRALLQDVLPKYIL	0.416185
sp|Q8NCH0|CHSTE_HUMAN	374	DFSLFAYPLPNVTKEACQQ**************	0.381334
sp|B4R947|CLPS_PHEZH	104	VAQVVDTARRHQHPLQCTMEKD***********	0.530698
sp|Q9NQW8|CNGB3_HUMAN	552	MLLRLKSVLYLPGDFVCKKGEIGKEMYIIKHGE	0.319114
sp|Q9NQW8|CNGB3_HUMAN	756	KDKGREPEEKPLDRPECTASPIAVEEEPHSVRR	0.494716
sp|Q8TBE1|CNIH3_HUMAN	45	IAFDELRTDFKSPIDQCNPVHARERLRNIERIC	0.462119
sp|Q9HBJ8|CLTRN_HUMAN	75	RKVPNREATEISHVLLCNVTQRVSFWFVVTDPS	0.402875
sp|Q6P4Q7|CNNM4_HUMAN	108	SFTEVDDAETLHKSTSCLELTKDLVVQQLVNVS	0.514168
sp|Q6P4Q7|CNNM4_HUMAN	151	LTKFLRRSESMKLYALCTRAQPDGPWLKWTDKD	0.252219
sp|Q6P4Q7|CNNM4_HUMAN	220	LGLMALDPMELRIVQNCGTEKERRYARKIEPIR	0.412373
sp|Q9QZR9|CO4A4_MOUSE	3	**************MRCFFRWTKSFVTAPWSLI	0.281057
sp|Q9QZR9|CO4A4_MOUSE	422	GPPGFPGEAGVPGRLDCAPGKPGKPGLPGLPGA	0.389084
sp|Q9QZR9|CO4A4_MOUSE	452	PGAPGPEGPPGSDVIYCRPGCPGPMGEKGKVGP	0.261982
sp|Q9QZR9|CO4A4_MOUSE	456	GPEGPPGSDVIYCRPGCPGPMGEKGKVGPPGRR	0.314878
sp|Q9QZR9|CO4A4_MOUSE	486	GRRGAKGAKGNKGLCTCPPGPMGPPGPPGPPGR	0.317332
sp|Q9QZR9|CO4A4_MOUSE	660	TRGFDGTKGQKGDSILCNVSYPGKPGLPGLDGP	0.364957
sp|Q9QZR9|CO4A4_MOUSE	693	PGLKGFPGPPGAPGMRCPDGQKGQRGKPGMSGI	0.513877
sp|Q9QZR9|CO4A4_MOUSE	782	GLPGAPGMKGQKGHPGCPGAGGPPGIPGSPGLK	0.545007
sp|Q9QZR9|CO4A4_MOUSE	820	EGSRGFPGIPGSPGHSCERGAPGIPGQPGLPGT	0.361553
sp|Q9QZR9|CO4A4_MOUSE	1072	DGARGPKGYKGDPASQCGPPGPKGEPGSPGYQG	0.557738
sp|Q9QZR9|CO4A4_MOUSE	1122	GPPGRPGQPGSFGPPGCPGDPGMPGLKGHPGEV	0.34173
sp|Q9QZR9|CO4A4_MOUSE	1286	PGSPGNVDLLKGDPGDCGLPGPPGSRGPPGPPG	0.422801
sp|Q9QZR9|CO4A4_MOUSE	1303	GLPGPPGSRGPPGPPGCQGPPGCDGKDGQKGPM	0.551475
sp|Q9QZR9|CO4A4_MOUSE	1309	GSRGPPGPPGCQGPPGCDGKDGQKGPMGLPGLP	0.381216
sp|Q9QZR9|CO4A4_MOUSE	1354	GLPGPPGRKGPVGPPGCRGEPGPPADVDSCPRI	0.468078
sp|Q9QZR9|CO4A4_MOUSE	1367	PPGCRGEPGPPADVDSCPRIPGLPGVPGPRGPE	0.43977
sp|Q9QZR9|CO4A4_MOUSE	1399	EGAMGEPGRRGLPGPGCKGEPGPDGRRGQDGIP	0.496903
sp|Q9QZR9|CO4A4_MOUSE	1432	GSPGPPGRKGDTGEAGCPGAPGPPGPTGDPGPK	0.528072
sp|Q9QZR9|CO4A4_MOUSE	1675	PDTLKEVQAQRRKISRCQVCMKHS*********	0.298996
sp|Q9QZR9|CO4A4_MOUSE	1678	LKEVQAQRRKISRCQVCMKHS************	0.296083
sp|J9VL95|CMT2_CRYNH	49	ETCPKSTKTPGSGPCNCGVKEKVSTCGCNGSGA	0.321118
sp|A7GYG9|COAD_CAMC5	5	************MKRSCIYPGTFDPITNGHLDV	0.266983
sp|Q9R0H0|ACOX1_MOUSE	297	VRSFLVGSAAQSLSKACTIAIRYSAVRRQSEIK	0.461859
sp|Q9R0H0|ACOX1_MOUSE	531	AWNLTSVDLVRASEAHCHYVTVKVFADKLPKIQ	0.449126
sp|Q99J72|ABEC3_MOUSE	64	KGRKDTFLCYEVTRKDCDSPVSLHHGVFKNKDN	0.299093
sp|Q99J72|ABEC3_MOUSE	290	LCYQLEQFNGQAPLKGCLLSEKGKQHAEILFLD	0.359396
sp|Q8BGM7|AAKG3_MOUSE	280	IEEHKIETWREIYLQGCFKPLVSISPNDSLFEA	0.267299
sp|Q13362|2A5G_HUMAN	4	*************MLTCNKAGSRMVVDAANSNG	0.505776
sp|Q13362|2A5G_HUMAN	334	SEFVKIMEPLFRQLAKCVSSPHFQVAERALYYW	0.356172
sp|Q13362|2A5G_HUMAN	408	NALKLFMEMNQKLFDDCTQQFKAEKLKEKLKMK	0.29928
sp|Q13362|2A5G_HUMAN	513	SELPQDPHTKKALEAHCRADELASQDGR*****	0.380536
sp|Q9UH17|ABC3B_HUMAN	217	NFNNDPLVLRRRQTYLCYEVERLDNGTWVLMDQ	0.403431
sp|Q9UH17|ABC3B_HUMAN	247	MDQHMGFLCNEAKNLLCGFYGRHAELRFLDLVP	0.366128
sp|P14060|3BHS1_HUMAN	6	***********MTGWSCLVTGAGGFLGQRIIRL	0.257491
sp|P14060|3BHS1_HUMAN	183	LAANGWNLKNGGTLYTCALRPMYIYGEGSRFLS	0.554254
sp|Q9Y2T4|2ABG_HUMAN	394	SRESSKPRAVLKPRRVCVGGKRRRDDISVDSLD	0.312809
sp|P33897|ABCD1_HUMAN	39	ALAAYGAHKVYPLVRQCLAPARGLQAPAGEPTQ	0.501602
sp|Q8TDX5|ACMSD_HUMAN	53	AKLLKDGKVFRVVRENCWDPEVRIREMDQKGVT	0.479256
sp|Q8TDX5|ACMSD_HUMAN	247	FTVGRISHGFSMRPDLCAQDNPMNPKKYLGSFY	0.396689
sp|Q9Y2D5|AKAP2_HUMAN	10	*******MEIEVSVAECKSVPGITSTPHPMDHP	0.379574
sp|Q9Y2D5|AKAP2_HUMAN	762	TQSPRTKNAPSLPSRTCYKTAPGKIEKVKPPPS	0.330455
sp|P21063|A40_VACCC	56	TPSIDKTIKDAYIREDCPTDWISYNNKCIHLST	0.263851
sp|P21063|A40_VACCC	149	ATKNGNIFVAQRILPNCIRVTLYNNYTTFLSYH	0.515584
sp|Q8NFM4|ADCY4_HUMAN	289	SVLYADIVGFTRLASECSPKELVLMLNELFGKF	0.432741
sp|Q8NFM4|ADCY4_HUMAN	376	GVDINMRVGVHSGSVLCGVIGLQKWQYDVWSHD	0.436515
sp|P28332|ADH6_HUMAN	10	*******MSTTGQVIRCKAAILWKPGAPFSIEE	0.409684
sp|P28332|ADH6_HUMAN	47	PPKAKEVRIKVVATGLCGTEMKVLGSKHLDLLY	0.64719
sp|P28332|ADH6_HUMAN	241	VNKEKFKKAQELGATECLNPQDLKKPIQEVLFD	0.478366
sp|P80207|ALL1_BRAJU	111	HEISRIYQTATHLPRVCNIPRVSICPFQKTMPG	0.510947
sp|P80207|ALL1_BRAJU	119	TATHLPRVCNIPRVSICPFQKTMPGPS******	0.416049
sp|Q80TR1|AGRL1_MOUSE	41	LSRAGLPFGLMRRELACEGYPIELRCPGSDVIM	0.452614
sp|Q80TR1|AGRL1_MOUSE	475	TRRPPAPNLHVSPELFCEPREVRRVQWPATQQG	0.378306
sp|Q80TR1|AGRL1_MOUSE	527	LPALGLWNPRGPDLSNCTSPWVNQVAQKIKSGE	0.284688
sp|Q80TR1|AGRL1_MOUSE	989	GIAAAIDYRSYGTEKACWLRVDNYFIWSFIGPV	0.24881
sp|Q86TB3|ALPK2_HUMAN	13	****MKDSEGPQRPPLCFLSTLLSQKVPEKSDA	0.402036
sp|Q86TB3|ALPK2_HUMAN	33	TLLSQKVPEKSDAVLRCIISGQPKPEVTWYKNG	0.465358
sp|Q86TB3|ALPK2_HUMAN	565	PNANLRESTTEGTLHLCSAKESAEPPLTQSDKR	0.315065
sp|Q86TB3|ALPK2_HUMAN	602	TTAAATGRSSHADARECAISTQAEQEAKTLQTS	0.457506
sp|Q86TB3|ALPK2_HUMAN	630	TLQTSTDSVSKEGNTNCKGEGMQVNTLFETSQV	0.304559
sp|Q86TB3|ALPK2_HUMAN	713	VHKENASLAQHSEVKPCTCGPQHEEKQDRDGNI	0.440825
sp|Q86TB3|ALPK2_HUMAN	715	KENASLAQHSEVKPCTCGPQHEEKQDRDGNIPD	0.372624
sp|Q86TB3|ALPK2_HUMAN	836	DSLVGRPVDKYSPQEICSVDTELAEGQNKVSDL	0.322863
sp|Q86TB3|ALPK2_HUMAN	853	SVDTELAEGQNKVSDLCSSNDKTLEVFFQTQVS	0.608737
sp|Q86TB3|ALPK2_HUMAN	998	VSFPWEKPTTLTANNECFQATRETEDTSTVTIA	0.398455
sp|Q86TB3|ALPK2_HUMAN	1395	KQLKMDHTAFFKKFLTCPKILESSVDPIDEISV	0.339948
sp|Q86TB3|ALPK2_HUMAN	1673	SGERELEKAPKLLQDPCQKGTLGCAKKSREREK	0.419036
sp|Q86TB3|ALPK2_HUMAN	1680	KAPKLLQDPCQKGTLGCAKKSREREKSLEARAG	0.250913
sp|Q86TB3|ALPK2_HUMAN	1952	STVMHGLMPVFKPGHACVLKVHNAIAYGTRNND	0.513349
sp|Q86TB3|ALPK2_HUMAN	1982	NNDELIQRNYKLAAQECYVQNTARYYAKIYAAE	0.526043
sp|Q86TB3|ALPK2_HUMAN	2107	VGIATLAKGYKGFKGNCSMTFIDQFKALHQCNK	0.297092
sp|A0Q5X2|ALR_FRATN	28	RNNIRIIKEYVGSAKICFPVKANAYGHGLELIV	0.557809
sp|A0Q5X2|ALR_FRATN	207	ICHLSNSYGFLGQKGICYDMVRPGILSYGFLPE	0.324414
sp|C1GEY4|AMPP1_PARBD	329	DAKAIKNDTELEGMRACHIRDGAALTKYFAWLE	0.416733
sp|Q969Q4|ARL11_HUMAN	178	LPEALQSLWSLLKSRSCMCLQARAHGAERGDSK	0.311595
sp|Q969Q4|ARL11_HUMAN	180	EALQSLWSLLKSRSCMCLQARAHGAERGDSKRS	0.277048
sp|Q8IUR7|ARMC8_HUMAN	3	**************MACLLETPIRMSVLSEVTA	0.489334
sp|Q8IUR7|ARMC8_HUMAN	407	TGLSESSVKVRLAAVRCLHSLSRSVQQLRTSFQ	0.310877
sp|Q8IUR7|ARMC8_HUMAN	578	LILEGEHNIEVKEQTLCILANIADGTTAKDLIM	0.262111
sp|Q8IUR7|ARMC8_HUMAN	661	IVDILHKLSQSPDSNLCDKAKMALQQYLA****	0.549428
sp|Q8MQX9|ANKL2_DROME	284	TPTSLKEGCRYNAMHICAQVNKARIAQLLLKTI	0.328837
sp|Q8MQX9|ANKL2_DROME	380	CKSLRNHEGKEPKEIICLRNANATHVTIKKLEL	0.32423
sp|Q8MQX9|ANKL2_DROME	538	TSSPKPTKNVPNGTNECEHNNNNVKPVYPLEFP	0.549261
sp|P17342|ANPRC_HUMAN	108	LLPPGTRFQVAYEDSDCGNRALFSLVDRVAAAR	0.267624
sp|P17342|ANPRC_HUMAN	136	VAAARGAKPDLILGPVCEYAAAPVARLASHWDL	0.417742
sp|P17342|ANPRC_HUMAN	261	EDIVRNIQASERVVIMCASSDTIRSIMLVAHRH	0.328781
sp|P17342|ANPRC_HUMAN	473	LRIDENRIVEHTNSSPCKSSGGLEESAVTGIVV	0.391991
sp|C5K0R2|AMPP2_BLAGS	326	AEAKHIYKLVEHMQESCMVRVKEGVRYLDLHIL	0.247608
sp|C5K0R2|AMPP2_BLAGS	504	PKGDGMLEIIRQGDGSCNI**************	0.436399
sp|P0CM31|ATG2_CRYNB	780	APPPTARGKKMKADIRCDLVRLSVRCPAPPPEP	0.287139
sp|P0CM31|ATG2_CRYNB	789	KMKADIRCDLVRLSVRCPAPPPEPAERQIGDGR	0.367798
sp|P0CM31|ATG2_CRYNB	906	ASSLPASSIAKTTLVTCKMPAIRASVHHPTVTG	0.405489
sp|Q96GD4|AURKB_HUMAN	170	LEYAPRGELYKELQKSCTFDEQRTATIMEELAD	0.526793
sp|Q83G89|ATPA_TROWT	206	IINQKDNWSDPEKRVFCIYVAIGQKGSTIAGVK	0.252913
sp|Q83G89|ATPA_TROWT	490	LEYLRNRTSILDDLRTCGDLTDALLERLKEAVE	0.338113
sp|Q62388|ATM_MOUSE	141	MDTVKDSSNGLTYGADCSNILLKDILSVRKYWC	0.257853
sp|Q62388|ATM_MOUSE	198	INRVLVARIIHAVTRGCCSQTDGLPSKFLDLFS	0.304234
sp|Q62388|ATM_MOUSE	199	NRVLVARIIHAVTRGCCSQTDGLPSKFLDLFSK	0.370707
sp|Q62388|ATM_MOUSE	383	SQSYVTQRESTDYSVPCKRRKIDVGWEVIKDYL	0.428449
sp|Q62388|ATM_MOUSE	563	ICVVPDAIKMGTEQSVCEANRSFSVKESIMRWL	0.390888
sp|Q62388|ATM_MOUSE	754	EAHKSELFQKAKSLMQCAGESISLFKNKTNEES	0.249934
sp|Q62388|ATM_MOUSE	1036	FLTVMGAFWHLTKEKKCVFSVRMALVKCLQTLL	0.380468
sp|Q62388|ATM_MOUSE	1180	VLHCSPVCEKQALFALCKSVKENRLEPHLVKKV	0.269198
sp|Q62388|ATM_MOUSE	1206	PHLVKKVLEKVSESFGCRSLEDFMISHLDYLVL	0.248966
sp|Q62388|ATM_MOUSE	1430	ILSKIPDSYQKILLAICEQAAETNNVFKKHRIL	0.310847
sp|Q62388|ATM_MOUSE	1742	NTLVEDSVKIRSAAATCLKNILATKIGHIFWEN	0.627733
sp|Q62388|ATM_MOUSE	2027	LLEIYRSIGEPDSLYGCGGGKMLQPLTRIRTYE	0.440096
sp|Q62388|ATM_MOUSE	2255	ILETLVQKEMERSQGACSKDILTKHLVEFSVLA	0.301189
sp|Q62388|ATM_MOUSE	2460	TNRYTVKVQRELELDECALRALREDRKRFLCKA	0.447832
sp|Q62388|ATM_MOUSE	2714	TEFRLAGGLNLPKIIDCVGSDGKERRQLVKGRD	0.435766
sp|Q62388|ATM_MOUSE	2763	TLLQRNTETRKRKLTICTYKVVPLSQRSGVLEW	0.489411
sp|Q62388|ATM_MOUSE	2811	DGAHRRYRPNDFSANQCQKKMMEVQKKSFEEKY	0.522035
sp|Q96SQ7|ATOH8_HUMAN	16	*MKHIPVLEDGPWKTVCVKELNGLKKLKRKGKE	0.404868
sp|Q96SQ7|ATOH8_HUMAN	157	EAQPFREPGLRPRILLCAPPARPAPSAPPAPPA	0.334159
sp|Q96SQ7|ATOH8_HUMAN	259	VHTISAAFEALRKQVPCYSYGQKLSKLAILRIA	0.578063
sp|Q96SQ7|ATOH8_HUMAN	276	YSYGQKLSKLAILRIACNYILSLARLADLDYSA	0.395923
sp|Q92858|ATOH1_HUMAN	272	AQQASGGSQRPTPPGSCRTRFSAPASAGGYSVQ	0.295399
sp|A6LD84|BIOB_PARD8	52	AAHQITRHFMGNKFDTCSIINAKSGNCSEDCKW	0.36327
sp|A6LD84|BIOB_PARD8	90	HYKTLVNLYPLLPAKECVYHAVYNRKQGIRRFA	0.39306
sp|A6LD84|BIOB_PARD8	175	NYHCNIETAPSYFRQLCSTHTIEQKMETIHTAR	0.324004
sp|P13497|BMP1_HUMAN	97	KSSIKAAVPGNTSTPSCQSTNGQPQRGACGRWR	0.586667
sp|P13497|BMP1_HUMAN	205	VGRRGGGPQAISIGKNCDKFGIVVHELGHVVGF	0.520374
sp|P13497|BMP1_HUMAN	510	EVRDGHSESSTLIGRYCGYEKPDDIKSTSSRLW	0.283709
sp|P13497|BMP1_HUMAN	551	INKAGFAVNFFKEVDECSRPNRGGCEQRCLNTL	0.269196
sp|P13497|BMP1_HUMAN	666	EVRSGLTADSKLHGKFCGSEKPEVITSQYNNMR	0.3025
sp|P13497|BMP1_HUMAN	773	TITSPNWPDKYPSKKECTWAISSTPGHRVKLTF	0.406619
sp|P13497|BMP1_HUMAN	822	EVFDGRDAKAPVLGRFCGSKKPEPVLATGSRMF	0.280949
sp|P13497|BMP1_HUMAN	860	DNSVQRKGFQASHATECGGQVRADVKTKDLYSH	0.550779
sp|Q8V7J0|CAPSD_TTVV6	219	KSLQTKPRGKPYVKFFCKPPKLMLNKWYFTKDF	0.269884
sp|Q8V7J0|CAPSD_TTVV6	548	YPNFAHQREVLERVVSCGPFMVRDQEKNSWDIT	0.322181
sp|P11819|CAPSH_ADE40	209	QNAAGRILKQTTPMQPCYGSYARPTNEKGGQAK	0.435145
sp|P11819|CAPSH_ADE40	730	FEIKRTVDGEGYNVAQCNMTKDWFLIQMLSHYN	0.41924
sp|P27482|CALL3_HUMAN	27	TEFKEAFSLFDKDGDGCITTRELGTVMRSLGQN	0.350987
sp|Q9E6S6|CAPSD_HBVC0	48	DTASALYREALESPEHCSPHHTALRQAILCWGE	0.515922
sp|Q9E6S6|CAPSD_HBVC0	183	RSQSPRRRRSQSRESQC****************	0.385266
sp|Q8NEL0|CCD54_HUMAN	120	QMEVLETRMNVNEDKQCTTTKDILSMKEDIKAL	0.414454
sp|A1AHM5|CBRA_ECOK1	46	ALDKKHQHGTEGFSKPCGGLLAPDAQRSFIRDG	0.565608
sp|A1AHM5|CBRA_ECOK1	250	MSAFQFQFGKAVKSEKCTVLFPSRWQDFVCGKD	0.341588
sp|A1AHM5|CBRA_ECOK1	331	TRKLRLKLFGKIVKSRCLTAPALRKWIMRSGVA	0.465284
sp|Q9QMI2|CAPSD_HBVD4	48	DTAAALYRDALESPEHCSPHHTALRQAILCWGD	0.510232
sp|Q9QMI2|CAPSD_HBVD4	183	RSQSPRRRRSQSRESQC****************	0.385266
sp|P0DTP9|C1L_VARV	47	HSALYYAIADNNMRLVCTLLNAGALKNLLENEF	0.312651
sp|P79188|C5AR1_MACMU	181	FLYRVVREEYFPPKVLCGVDHGHDKRRERAVAI	0.440472
sp|Q8N9Z2|CC71L_HUMAN	104	FSPHILRSKDVYGYSSCRALVPDPPGPPTARGQ	0.289882
sp|Q8N9Z2|CC71L_HUMAN	161	RKPRPPPPPPPPPEESCPAKPVAPGPCFGGRTL	0.639257
sp|Q8N9Z2|CC71L_HUMAN	171	PPPEESCPAKPVAPGPCFGGRTLEEIWRAATPT	0.534368
sp|Q9Y426|C2CD2_HUMAN	244	VLITKPTTVKEAQNLQCAASTAQESCPPKPPRA	0.362082		oxidation		SOH
sp|Q9Y426|C2CD2_HUMAN	253	KEAQNLQCAASTAQESCPPKPPRAHELKLLVRN	0.322808				SOH
sp|Q9Y426|C2CD2_HUMAN	413	PPVPAAKIEKDRTVMPCGTVVTTVTAVKTKPRV	0.413526		oxidation		SOH
sp|Q9Y426|C2CD2_HUMAN	463	IKVKVIEKDISVQAIACRSAPVSKTLSSSDTEL	0.446062		oxidation		SOH
sp|Q9Y426|C2CD2_HUMAN	695	SRHRNKNTMNGAPVEPCT***************	0.399404
sp|P15088|CBPA3_HUMAN	173	LKIGEKNERRKAIFTDCGIHAREWVSPAFCQWF	0.428989
sp|P15088|CBPA3_HUMAN	245	KNRMWRKNRSKNQNSKCIGTDLNRNFNASWNSI	0.400878
sp|P15088|CBPA3_HUMAN	398	KGKFGFLLPESRIKPTCRETMLAVKFIAKYILK	0.323054
sp|Q5RIA9|CBWD5_HUMAN	310	IQNLLWEKNVRNKDNHCMEVIRLKGLVSIKDKS	0.344745
sp|Q5RIA9|CBWD5_HUMAN	394	TETEKQWTTHFKEDQVCT***************	0.37816
sp|P0CM53|CAF17_CRYNB	227	LESCMDIHGGVDFRKGCFLGQELTVRTYHTGAT	0.31368
sp|A8PRN6|CHO2_MALGO	396	SYATSERGTAAVPSPPCTNVHDLHHRLFRNDNV	0.547779
sp|A8PRN6|CHO2_MALGO	702	LLEQSRPRLERLADDTCALLQQKAEHVLTMHTG	0.341875
sp|P80075|CCL8_HUMAN	59	IPIQRLESYTRITNIQCPKEAVIFKTKRGKEVC	0.491524
sp|P80075|CCL8_HUMAN	75	CPKEAVIFKTKRGKEVCADPKERWVRDSMKHLD	0.464805
sp|Q9Y232|CDYL_HUMAN	515	ANEMLLSGRKLTAQEACGKGLVSQVFWPGTFTQ	0.663247
sp|Q9Y232|CDYL_HUMAN	543	GTFTQEVMVRIKELASCNPVVLEESKALVRCNM	0.518268
sp|Q9Y232|CDYL_HUMAN	571	VRCNMKMELEQANERECEVLKKIWGSAQGMDSM	0.328968
sp|Q8V4Y0|CAHH_MONPZ	262	VRENYFMKWLSDLREACFSYYQKYIEGNKTFAI	0.280086
sp|C1GZK1|CHO2_PARBA	145	GIGWLLHMQSNGRTLVCWAKKSNIFVNPSTGRN	0.359353
sp|C1GZK1|CHO2_PARBA	953	EVVRADGNVRNLAWRICNAKKVLAPYSMSRTNG	0.322855
sp|Q8NHU2|CFA61_HUMAN	26	KVEVVHCRRTESQDVYCIKSLIRKFTCKLFGKL	0.25628
sp|Q8NHU2|CFA61_HUMAN	58	LNIIYLLEKANLAVTLCNDKEEIMAQATFLDYP	0.62536
sp|Q8NHU2|CFA61_HUMAN	586	YTKFFLKEILRLGFKSCLYYRVYPKSREGKFQN	0.290413
sp|Q8NHU2|CFA61_HUMAN	722	KKLLDTEQRKFLASDHCFNDKDYALMSLCSWVN	0.289794
sp|Q8NHU2|CFA61_HUMAN	1102	YFRIHINKYKMVETITCLSREPFPASNYIRLFG	0.295295
sp|Q9BWT1|CDCA7_HUMAN	254	IIRPVEEITEEELENVCSNSREKIYNRSLGSTC	0.425306
sp|Q96LL4|CH048_HUMAN	4	*************MAICPELAQTDKSALANLSD	0.506415
sp|P52460|CCU83_HHV6U	7	**********MAIGFICSSPDAELFSEKSRMSS	0.29567
sp|Q9H7U1|CCSE2_HUMAN	58	SKNSNVKSYIKNNGSDCPSSHSFNWRKANKYQL	0.393299
sp|Q9H7U1|CCSE2_HUMAN	75	PSSHSFNWRKANKYQLCAQGVEEPNNTQNSHDK	0.393818
sp|Q9H7U1|CCSE2_HUMAN	193	YGNRSAGSMQRPRANSCATRSSSGESLAQSPDS	0.260671
sp|Q9H7U1|CCSE2_HUMAN	347	SGTMTVDGNKNSPADTCVEEDATVLAKDRAANK	0.449128
sp|Q9H7U1|CCSE2_HUMAN	672	NTVILDEMTLRHMVQDCTAVKTQLLKLKRLLHQ	0.328743
sp|Q9BPX7|CG025_HUMAN	8	*********MSAHSMLCERIAIAKELIKRAESL	0.448651
sp|Q9BPX7|CG025_HUMAN	39	SLSRSRKGGIEGGAKLCSKLKAELKFLQKVEAG	0.337693
sp|Q9BPX7|CG025_HUMAN	304	VLPQLEAFMKDKELFACESAVKDFQSILDTLGG	0.505107
sp|A0PJX0|CIB4_HUMAN	4	*************MGQCLRYQMHWEDLEEYQAL	0.440232
sp|P0CS30|CIAO1_CRYNJ	32	PAWTVSFNPTRSLLASCSTDRTIRLYSYIIPSS	0.391425
sp|Q9DCL2|CIA2A_MOUSE	107	SLATLIGLCLRVKLQRCLPFKHKLEIYISEGTH	0.29586
sp|Q00537|CDK17_HUMAN	233	LVALKEIRLEHEEGAPCTAIREVSLLKDLKHAN	0.596133			succination	SOH
sp|P15813|CD1D_HUMAN	279	LRATLDVVAGEAAGLSCRVKHSSLEGQDIVLYW	0.261615
sp|Q8IZL9|CDK20_HUMAN	5	************MDQYCILGRIGEGAHGIVFKA	0.384102
sp|Q8IZL9|CDK20_HUMAN	118	AQVKSYLQMLLKGVAFCHANNIVHRDLKPANLL	0.397
sp|F1QMB9|CCNK_DANRE	405	PPPLPHRPPPTEFGGPCSDFLSSVKHKRRYLDD	0.380724
sp|Q9N1E5|CD22_PANPA	219	ELKFSPQWSHHGKIVTCQLQDADGKFLSNDTVQ	0.365883
sp|P10747|CD28_HUMAN	86	GNYSQQLQVYSKTGFNCDGKLGNESVTFYLQNL	0.432177
sp|P10747|CD28_HUMAN	141	NEKSNGTIIHVKGKHLCPSPLFPGPSKPFWVLV	0.462316
sp|P0CK51|CEP3_EBVB9	48	FNLETTKLIAAEEGRACGETNEGLEYDEDSEND	0.367428
sp|P52458|CEP1_HHV7J	25	GFETLDIFNISSVRNICELNKHAEHVSIKNLPL	0.448801
sp|P52458|CEP1_HHV7J	238	LQDDSKYLIDFLKSAICDAFSKEYKMTEIEKTS	0.419424
sp|Q9ZN37|CISY_HELPJ	21	LINNENNARYEFETIECTRGPKAVDFSKLFETT	0.299504
sp|Q9ZN37|CISY_HELPJ	86	GHRIEDLVAKYKYVDVCRLLLTGELPKNQDESL	0.305174
sp|Q9ZN37|CISY_HELPJ	176	TMARRIVAKIPTLAAICYRNEVGAPIIYPDIAR	0.413851
sp|Q8N6U2|CL033_HUMAN	39	SHFSPWPRTLGPAPALCVRTPLRPGPSSALGPL	0.296807
sp|Q8N6U2|CL033_HUMAN	97	SRAAGSGSTPGAGSKDCSPPPHSHSAAAAGESG	0.349335
sp|Q9NQ89|CL004_HUMAN	25	CNREREFVYKFKVGSQCLELRVPLKFPVQENAS	0.386097
sp|Q9UJ71|CLC4K_HUMAN	319	LQAWNDAPCDKTFLFICKRPYVPSEP*******	0.387102
sp|E7F568|COBL_DANRE	50	IFRNAVPDGGGSSGGDCKENMLRSYVDLHISLP	0.437464
sp|E7F568|COBL_DANRE	126	PVSFKPNALLGALDVSCALIKERVLEDRVIRKP	0.339503
sp|E7F568|COBL_DANRE	278	FNRRKSKGMSVVASGPCVEARPSTLGQSQSVMN	0.50311
sp|E7F568|COBL_DANRE	697	VLLRSTQSISSKPCTPCGVIQNKNNNACLTEEK	0.27942
sp|E7F568|COBL_DANRE	708	KPCTPCGVIQNKNNNACLTEEKHRSPFPDIEKQ	0.322897
sp|E7F568|COBL_DANRE	1049	VTVKPTENPVPSFRPKCLQSYVAEKPTSSERIS	0.464012
sp|E7F568|COBL_DANRE	1194	GEGIERLRKVSDLPTSCTVKKPSYNDPENERSA	0.453521
sp|Q6ZU45|CL20A_HUMAN	11	******MLPRALLLSFCAAALQLVSSKRDLVLV	0.303508
sp|Q6ZU45|CL20A_HUMAN	122	ATLYTWLKLPSIGAASCTAQKPFLCYCDPDVGH	0.382708
sp|Q8CJ53|CIP4_MOUSE	99	FAGQRELVAESLGIRVCLELAKYSQEMKQERKM	0.455705
sp|Q181F7|COAX_CLOD6	181	ASKLPRVELAKPGMTICKSTVSAMQSGIIYGYV	0.374249
sp|Q181F7|COAX_CLOD6	213	VGLVDKIISIMKKELNCDDVKVIATGGLAKLIA	0.604611
sp|O95336|6PGL_HUMAN	32	QELGAALAQLVAQRAACCLAGARARFALGLSGG	0.377044				SOH
sp|O95336|6PGL_HUMAN	33	ELGAALAQLVAQRAACCLAGARARFALGLSGGS	0.36975
sp|P27348|1433T_HUMAN	94	LIKDYREKVESELRSICTTVLELLDKYLIANAT	0.374143	carbonylation	oxidation		SOH
sp|P27348|1433T_HUMAN	134	YLKMKGDYFRYLAEVACGDDRKQTIDNSQGAYQ	0.263939	carbonylation	oxidation		SOH
sp|Q94FB9|AB1D_ARATH	55	YLKSRVASRRPDSSRLCNGQSDDDETLEKLTAT	0.279636
sp|Q94FB9|AB1D_ARATH	631	DMEERFAAKVRAMGTSCITISHRPALVAFHDVV	0.423757
sp|Q94FB9|AB1D_ARATH	1118	VDIITPAQKLMASKLSCEIVSGKSLLVTGPNGS	0.485183
sp|Q94FB9|AB1D_ARATH	1180	LGSGNGMFFVPQRPYTCLGTLRDQIIYPLSKEE	0.458193
sp|P28564|5HT1B_RAT	384	SNEDFKQAFHKLIRFKCTG**************	0.361492
sp|Q9Y614|ACL7B_HUMAN	83	GEPRPTYFISSTVGKRCPEAADAGDTRKWTLVG	0.561329
sp|Q9Y614|ACL7B_HUMAN	415	SKEEFEERGSVAIYSKC****************	0.477651
sp|Q13131|AAPK1_HUMAN	425	LGIRSQSRPNDIMAEVCRAIKQLDYEWKVVNPY	0.381819
sp|C9JRZ8|AK1BF_HUMAN	187	LNKPGLKYKPVTNQVECHPYLTQEKLIQYCHSK	0.650342	carbonylation	oxidation		SOH
sp|C9JRZ8|AK1BF_HUMAN	200	QVECHPYLTQEKLIQYCHSKGITVTAYSPLGSP	0.254177
sp|P16638|ACLY_RAT	20	KAISEQTGKELLYKYICTTSAIQNRFKYARVTP	0.456802			succination
sp|P16638|ACLY_RAT	229	YILDLAAKVDATADYICKVKWGDIEFPPPFGRE	0.34541
sp|P16638|ACLY_RAT	632	GVTIIGPATVGGIKPGCFKIGNTGGMLDNILAS	0.326351				SOH
sp|P16638|ACLY_RAT	844	RELGLIRKPASFMTSICDERGQELIYAGMPITE	0.257148
sp|P16638|ACLY_RAT	1039	NVDGFIGVAFVDMLRNCGSFTREEADEYVDIGA	0.384832
sp|P86382|3SA7_NAJNA	3	**************LKCNKLIPLAYKTCPAGKD	0.579691
sp|P86382|3SA7_NAJNA	14	***LKCNKLIPLAYKTCPAGKDLCYKMYMVSNK	0.603515
sp|P86382|3SA7_NAJNA	21	KLIPLAYKTCPAGKDLCYKMYMVSNKTVPVKRG	0.292715
sp|P86382|3SA7_NAJNA	38	YKMYMVSNKTVPVKRGCIDVCPKNSLLVKYECC	0.314614
sp|P86382|3SA7_NAJNA	42	MVSNKTVPVKRGCIDVCPKNSLLVKYECCNTDR	0.270771
sp|Q96AP0|ACD_HUMAN	138	RFSLLPTEQPRLRVPGCNQDLDVQKKLYDCLEE	0.557268
sp|Q96AP0|ACD_HUMAN	320	APDPGQRSSSQPSPAICSAPATLTPRSPHASRT	0.391215
sp|Q96AP0|ACD_HUMAN	344	PRSPHASRTPSSPLQSCTPSLSPRSHVPSPHQA	0.351539
sp|Q96AP0|ACD_HUMAN	380	RPQKPSLEFKEFVGLPCKNRPPFPRTGATRGAQ	0.364416
sp|Q96AP0|ACD_HUMAN	399	RPPFPRTGATRGAQEPCSVWEPPKRHRDGSAFQ	0.449242
sp|P61163|ACTZ_HUMAN	34	SGVIKAGFAGDQIPKYCFPNYVGRPKHVRVMAG	0.483542
sp|P61163|ACTZ_HUMAN	222	HSSSEFEIVKAIKERACYLSINPQKDETLETEK	0.484791				SOH
sp|Q5VTM2|AGAP9_HUMAN	225	VRDREMPEVVEIRRSNCTNHCDLGDTSSYHTKV	0.295409
sp|Q5VTM2|AGAP9_HUMAN	397	STIKVPGKWPSLATSACAPISSSKSNGLSKDMD	0.40332
sp|Q96L96|ALPK3_HUMAN	64	VDLAPLAPARPRGPLICHTGHEQAGREPGPGSS	0.400274
sp|Q96L96|ALPK3_HUMAN	93	PGSSTKGPVLHDQDTRCAFLPRPPGPLQTRRYC	0.380067
sp|Q96L96|ALPK3_HUMAN	323	EPEVTWYKDDTELDRYCGLPKYEITHQGNRHTL	0.329102
sp|Q96L96|ALPK3_HUMAN	710	ATTDSKPISSLSQAPECGAQSLGKAPPQASVQV	0.335745
sp|Q96L96|ALPK3_HUMAN	973	CFVQTPEGSCFPKKPGCLPRSEEAVVTASRNHE	0.461991
sp|Q96L96|ALPK3_HUMAN	1040	QSSGPVEAKQEDSPFQCPKEERPGGVPCMDQGG	0.43749
sp|Q96L96|ALPK3_HUMAN	1086	PSLPGTGLTASPKAGPCSTPTSQHGSTATFLPS	0.291095
sp|Q96L96|ALPK3_HUMAN	1154	CAQVPDVEGRTPGPRSCDPGLIDSLKNYLLLLL	0.392083
sp|Q96L96|ALPK3_HUMAN	1620	LFGRLVSEELRGGGYGCGLRKASQAKVIYGLEP	0.353355
sp|Q96L96|ALPK3_HUMAN	1644	AKVIYGLEPIFESGRTCIIKVSSLLVFGPSSET	0.34686
sp|Q96L96|ALPK3_HUMAN	1674	SETSLVGRNYDVTIQGCKIQNMSREYCKIFAAE	0.329572
sp|Q96L96|ALPK3_HUMAN	1801	VQIATKLRGYQGLKESCFPALLDRFASSHQCNA	0.411479
sp|Q8IZF2|AGRF5_HUMAN	350	KLTIHNITPGDAGEYVCKLILDIFEYECKKKID	0.27193
sp|Q8IZF2|AGRF5_HUMAN	424	GKINIPGTPETDIDSSCSRYTLKADGTQCPSGS	0.265439
sp|Q8IZF2|AGRF5_HUMAN	621	GSSSLPAAKEVNKKQVCYKHNFNASSVSWCSKT	0.262707
sp|P81943|ALL5_APIGR	10	*******LPNPSGFVTCLSSISKSVYTPAINLK	0.490146
sp|Q8G3G6|ARC_BIFLO	250	PGNGKTMIAKAVANALCEGGYDTNGDGSISPAE	0.251998
sp|Q9Y4B4|ARIP4_HUMAN	184	SDGPQLPPRVLAQEVICLDSSSGSEDEKSSRDE	0.284564
sp|Q9Y4B4|ARIP4_HUMAN	471	PGPDVVICDEGHRIKNCQASTSQALKNIRSRRR	0.317827
sp|Q9Y4B4|ARIP4_HUMAN	533	RQEFSNMFERPILNGQCIDSTPQDVRLMRYRSH	0.307057
sp|Q9Y4B4|ARIP4_HUMAN	764	STLALIEEFLGKREVPCPPGTEGQGAQKWVRNI	0.54531
sp|Q9Y4B4|ARIP4_HUMAN	820	PSNLTTWLFLLSTRAGCLGVNLIGANRVVVFDA	0.34135
sp|Q9Y4B4|ARIP4_HUMAN	859	DAQAVCRVYRYGQKKPCYIYRLVADYTLEKKIY	0.396886
sp|Q9Y4B4|ARIP4_HUMAN	934	VSLNVKGIKESVLQLACLKYPHLITKEPFEHES	0.501746
sp|Q9Y4B4|ARIP4_HUMAN	1143	VPEDGRMAASGSQGPSCESTSNGRHSASSPKAP	0.447192
sp|Q6UXC1|AEGP_HUMAN	140	STAALRSPTLREAASSCKLRLWYHAASGDVAEL	0.294037
sp|Q6UXC1|AEGP_HUMAN	642	GPDQQGAGVDNVTLRDCSPTVTTERDREVSCNF	0.34608
sp|Q6UXC1|AEGP_HUMAN	656	RDCSPTVTTERDREVSCNFERDTCSWYPGHLSD	0.252186
sp|Q9H1A4|APC1_HUMAN	437	REKNSQASKVFITSDLCGQKFLCFLVESQLQLR	0.282829
sp|Q9H1A4|APC1_HUMAN	621	VRITIPEIATSELVQTCLQAIKFILPKEIAVQM	0.288319
sp|Q9H1A4|APC1_HUMAN	729	SDYHQNVESHLLNRSLCLSPSEASQMKDEDFSQ	0.255311
sp|Q9H1A4|APC1_HUMAN	988	EAVCLLIGRQDLSKQACEGNLPKGKSVLSSDVP	0.411532			succination
sp|Q9H1A4|APC1_HUMAN	1074	SDHEFIEEKENRLLQLCQRTMALPVGRGMFTLF	0.307455
sp|Q9H1A4|APC1_HUMAN	1288	VLLAEIGRPPGPEMEYCTDRESYSLAAGLALGM	0.439754
sp|Q9H1A4|APC1_HUMAN	1487	SLGFRFAGSENLSAFNCLHKFAKDFMTYLSAPN	0.283093
sp|Q4JVE4|APT_CORJK	78	ADPHSFKLLVQDLANHCRNFDIDLIGGLDARGF	0.303682
sp|Q69YU3|AN34A_HUMAN	134	ALDRGDRETLATLLDACKAKGTEVIIITTDTSP	0.395641
sp|P01160|ANF_HUMAN	146	CFGGRMDRIGAQSGLGCNSFRY***********	0.439303
sp|P70158|ASM3A_MOUSE	59	LHLDPTYHITDDRTKVCASSKGANASNPGPFGD	0.349182
sp|Q8WXK3|ASB13_HUMAN	165	HFGTPLHVACAREHLDCVKVLLNAGANVNAAKL	0.34924
sp|A6KXY5|ARGC_BACV8	122	DHDFIYGLPELNRRAICHSKHVANPGCFATCIQ	0.317236
sp|A6KXY5|ARGC_BACV8	232	YRGDFPRGIFATLVVKCKVELEELVKMYQDYYA	0.410587
sp|A6KXY5|ARGC_BACV8	271	IVDKNIDLKQVVNTNKCLIHLEKHGDKLLVISC	0.591928
sp|P50583|AP4A_HUMAN	6	***********MALRACGLIIFRRCLIPKVDNN	0.538247
sp|P50583|AP4A_HUMAN	14	***MALRACGLIIFRRCLIPKVDNNAIEFLLLQ	0.291313
sp|Q7Z5J8|ANKAR_HUMAN	367	KTERELPPFIYGRDFKCQNFHYKENQYFHVHGG	0.312908
sp|Q7Z5J8|ANKAR_HUMAN	410	ENALEDFQKNLEKIRDCAANTFIEDSGYKEYYS	0.341606
sp|Q7Z5J8|ANKAR_HUMAN	711	NIPELPVWKTLVEMLQCESYKRRMMAVMSLEVI	0.271414
sp|Q7Z5J8|ANKAR_HUMAN	851	NIENVLVNVMNCIRVLCIGNENNQRAVREHKGL	0.359115
sp|Q7Z5J8|ANKAR_HUMAN	1030	AVIALSKDSRMHQNQICEGNGIAPLVRLLRIST	0.320064
sp|Q7Z5J8|ANKAR_HUMAN	1416	STITSDITNVSRPRIVCLNQLGKHVQKANPEPA	0.391127
sp|A0A0U3C228|ARMH5_ARMME	91	MHKPGAAFKFVHGQRECYTDFKILGPDRTTWNV	0.36267
sp|A0A0U3C228|ARMH5_ARMME	368	VTEVEAQAWHDAKIGICQTRFLLVVLSAYRQMQ	0.278557
sp|A8QCB2|ARO1_MALGO	793	PSSTRITGIANQRVKECDRLRAVVTELAKLGVR	0.276914
sp|A8QCB2|ARO1_MALGO	1233	TMHWMAPAMRRLYTRACVLGDIAKLVGFARTWQ	0.528204
sp|A8QCB2|ARO1_MALGO	1446	AIVDLVAKHDGGRTRACTALVIGAGGSARAALY	0.436819
sp|A5UNA1|AROC_METS3	29	SFGSSHGKAVGAVIDGCPANLELNTEDIQKELD	0.284541
sp|A5UNA1|AROC_METS3	182	NDFDTVKENVEKNSVRCGDLEAAKAMEELILSK	0.581763
sp|A5UNA1|AROC_METS3	307	PIISRIAVKPTPSISKCQKSVNLEKMEAEDITI	0.436069
sp|A5UNA1|AROC_METS3	330	EKMEAEDITIQGRHDPCICPRATVVAQSSVAIV	0.270642
sp|A5UNA1|AROC_METS3	332	MEAEDITIQGRHDPCICPRATVVAQSSVAIVLA	0.335433
sp|P61158|ARP3_HUMAN	8	*********MAGRLPACVVDCGTGYTKLGYAGN	0.460772				SOH
sp|P61158|ARP3_HUMAN	12	*****MAGRLPACVVDCGTGYTKLGYAGNTEPQ	0.26903
sp|P61158|ARP3_HUMAN	235	QSLETAKAVKERYSYVCPDLVKEFNKYDTDGSK	0.44429		oxidation		SOH
sp|P61158|ARP3_HUMAN	408	QVCHTKKDYEEIGPSICRHNPVFGVMS******	0.380563				SOH
sp|Q9NSY1|BMP2K_HUMAN	32	GGAAGGGAGGAGAGAGCGSGGSSVGVRVFAVGR	0.627167
sp|Q9NSY1|BMP2K_HUMAN	76	GGFSTVFLVRTHGGIRCALKRMYVNNMPDLNVC	0.249843
sp|Q9NSY1|BMP2K_HUMAN	292	GNFTIPDNSRYSRNIHCLIRFMLEPDPEHRPDI	0.304532
sp|Q9NSY1|BMP2K_HUMAN	912	DVFTKAPFSKKVNVQECHAVGPEAHTIPGYPKS	0.422586
sp|B4RBP5|BIOB_PHEZH	143	KVAAMISGVKALGLETCATLGMLTADQAKALKA	0.28743
sp|B4RBP5|BIOB_PHEZH	269	VDPLEFVRMIAVARIVCPKSMVRIAAGREHMTK	0.368464
sp|O57254|B5_VACCA	237	PSSTCIDGKWNPILPTCVRSNEKFDPVDDGPDD	0.250883
sp|Q95J53|BTBDG_MACFA	217	ITRLMPSTIKNFYEAGCKYKEEQLTTACEKWLE	0.258817
sp|A7LXS9|BGH2A_BACO1	299	TPYLYTLVTKVMRNEECMDRYTTPVGIRTFSLD	0.365126
sp|A7LXS9|BGH2A_BACO1	501	VSFVKGLDPTRPVTAGCNEPNSGNHLFRSGVLD	0.578474
sp|A7LXS9|BGH2A_BACO1	735	KVIARESGKVVAEKEICTAGKPAEIRLTPDRSI	0.540739
sp|A7LXS9|BGH2A_BACO1	817	SMERFKDEKRKAFYGKCLVVIQNDGKPGKAKLT	0.41902
sp|Q92560|BAP1_HUMAN	320	ASEGNHTDGAEEAAGSCAQAPSHSPPNKPKLVV	0.330551
sp|Q92560|BAP1_HUMAN	638	LSGEKYSPKELLALLKCVEAEIANYEACLKEEV	0.294278
sp|Q07812|BAX_HUMAN	62	ALDPVPQDASTKKLSECLKRIGDELDSNMELQR	0.26647		oxidation		SOH
sp|Q07812|BAX_HUMAN	126	VVALFYFASKLVLKALCTKVPELIRTIMGWTLD	0.498509
sp|Q1HVB5|BNL2B_EBVA8	67	IRRNALGGGVRPDAEDCIQRCHPLEPALGVSTK	0.291368
sp|Q9Y276|BCS1_HUMAN	234	RGIPYRRGYLLYGPPGCGKSSFITALAGELEHS	0.481943
sp|P0C723|BRRF1_EBVA8	169	YYDGISIGMRKVIADVCRSGYASMPSMTATHNL	0.354083
sp|P0C723|BRRF1_EBVA8	304	AEYIDLLKHTKHVLENCSAMQYK**********	0.469375
sp|P04919|B3AT_MOUSE	903	LRRLILPLIFRELELQCLDGDDAKVTFDEENGL	0.278543
sp|Q96Q91|B3A4_HUMAN	191	LLQRPQHYNQTTGTRPCWGSTHPRKASDNEEAP	0.282977
sp|Q96Q91|B3A4_HUMAN	212	HPRKASDNEEAPLREQCQNPLRQKLPPGAEAGT	0.437072
sp|Q96Q91|B3A4_HUMAN	338	LPPGRWDPTARIPPPKCLPSQHKRLPSQQREIR	0.500414
sp|Q96Q91|B3A4_HUMAN	797	VISLAHMDSLRRESRACAPGERPNFLGIREQRL	0.454568
sp|P33861|C10_VAR67	21	NDKGLQTIKLFNNEFDCIRNDIRELFKHVTDSD	0.254496
sp|P33861|C10_VAR67	213	LVNVETIGVIVNRSGKCLLVNNHLGIGIVKDKR	0.264712
sp|Q3KSQ7|BDLF2_EBVG	372	PSFKDVLAFRPSLVTNCTAPLKTSVKGPNWSGA	0.5565
sp|Q1HVG1|BZLF1_EBVA8	171	PARRTRKPLQPESLEECDSELDIKRYKNRVASR	0.444037
sp|Q5RHR6|BROMI_DANRE	789	RVVHPKSTPMDPIDRSCLKSFLSLVNLLSSPHA	0.267404
sp|Q5RHR6|BROMI_DANRE	921	IIDGLSVERNHILVRICAVGGPSERKLPPRALQ	0.447057
sp|Q8K3W0|BABA2_MOUSE	34	ISSVVRNGKVGLDATNCLRITDLKSGCTSLTPG	0.452709				SOH
sp|Q58F21|BRDT_HUMAN	276	QYNVVKTVKVTEQLRHCSEILKEMLAKKHFSYA	0.458307
sp|Q58F21|BRDT_HUMAN	475	KKKEKVNNSNENPRKMCEQMRLKEKSKRNQPKK	0.329187
sp|Q58F21|BRDT_HUMAN	574	TLKASTLRELEKYVSACLRKRPLKPPAKKIMMS	0.333443
sp|Q58F21|BRDT_HUMAN	694	PNDSPSKENVKKMKNECIPPEGRTGVTQIGYCV	0.656051
sp|Q58F21|BRDT_HUMAN	884	GNGLTVESFSNKIQNKCSGEEQKEHQQSSEAQD	0.290968
sp|P0DN25|C1C1L_HUMAN	223	DQSVIWKLSEDKQLAICLKYAGVHAENAEDYEG	0.394948
sp|P10844|BXB_CLOBO	309	LQNFRGIVDRLNKVLVCISDPNININIYKNKFK	0.337452
sp|P10844|BXB_CLOBO	1278	WYLKEVKRKPYNLKLGCNWQFIPKDEGWTE***	0.343161
sp|Q7Z6B0|CCD91_HUMAN	247	AIEKQYISAIEKQAHKCEELLNAQHQRLLEMLD	0.533013
sp|Q7Z6B0|CCD91_HUMAN	291	EALIQQSQEQKEILEKCLEEERQRNKEALVSAA	0.270777
sp|Q53HC0|CCD92_HUMAN	88	EQTGDGTSKSSELKKRCEELEAQLKVKENENAE	0.393862
sp|O62714|CASR_PIG	60	VAAKDQNLESRPESVECIRYNFRGFRWLQAMIF	0.461074
sp|O62714|CASR_PIG	101	PALLPNMTLGYRIFDTCNTVSKALEATLSFVAQ	0.445133
sp|O62714|CASR_PIG	449	DIYTCIPGRGLFTNGSCADIKKVEAWQVLKHLR	0.503528
sp|O62714|CASR_PIG	542	EKILWSGFSREVPFSNCSRDCLAGTRKGIIEGE	0.278754
sp|O62714|CASR_PIG	874	YIILFKPSRNTIEEVRCSTAAHAFKVAARATLR	0.461298
sp|P0DL68|CA1A_CONLM	3	**************SGCCSNPACRVNNPNIC**	0.48149
sp|P0DL68|CA1A_CONLM	4	*************SGCCSNPACRVNNPNIC***	0.446756
sp|P0DL68|CA1A_CONLM	9	********SGCCSNPACRVNNPNIC********	0.294832
sp|P54965|CBH_CLOPE	2	***************MCTGLALETKDGLHLFGR	0.614116
sp|A7XCE4|CAPSD_TTVV3	584	WKWGGNPISQQIVRHPCNGQTSSGNRVPRSVQA	0.391342
sp|Q180S8|CBID_CLOD6	21	VYIDGKKYRRGYTTGSCATGASKAAVYMLITKN	0.659202
sp|Q180S8|CBID_CLOD6	117	GYLTLKDIDSLSTNSECKSELYKFIRVYGGTGI	0.378303
sp|Q180S8|CBID_CLOD6	339	LALMGARYEFLNKINQCVTTEEAVELINNSEYR	0.252612
sp|C0M756|CARB_STRE4	182	VIVRPAFTLGGTGGGICSNEEVLRDIVENGLKL	0.455443
sp|C0M756|CARB_STRE4	204	LRDIVENGLKLSPVTQCLIERSIAGFKEIEYEV	0.514991
sp|C0M756|CARB_STRE4	663	TKAGVPILGTQLEDLDCAEDRELFEKALKELGI	0.293969
sp|Q07021|C1QBP_HUMAN	7	**********MLPLLRCVPRVLGSSVAGLRAAA	0.495413
sp|Q07021|C1QBP_HUMAN	39	APASPFRQLLQPAPRLCTRPFGLLSVRAGSERR	0.319127
sp|C5K1Y9|CBPYA_BLAGS	416	AEVMKALGAEVSTYDSCNMDINRNFLFRGDWMK	0.283399
sp|Q9BX69|CARD6_HUMAN	72	KSRKLLILVQKKGEATCQHFLKCLFSTFPQSAA	0.409412
sp|Q9BX69|CARD6_HUMAN	185	YDTPEVTLSYSVEKVGCEVPATITYIKDGQRYE	0.39532
sp|Q9BX69|CARD6_HUMAN	829	GTFGRLPRPICQHVQACPERPQMMGTLERSRAV	0.262114
sp|Q9BX69|CARD6_HUMAN	872	DSQPARAVGKPWPQQACTRVTELTEATGKLIRT	0.504019
sp|Q9BX69|CARD6_HUMAN	975	PFHSVPSQPKSSQTKSCQSQPSQTKPSPCKSTQ	0.316781
sp|P0C6H6|CAPSD_HBVC4	48	DTASALYREALESPEHCSPHHTALRQAILCWGE	0.515922
sp|P0C6H6|CAPSD_HBVC4	183	RSESPRRRRSQSRESQC****************	0.398069
sp|Q8IZS8|CA2D3_HUMAN	686	LEAIKLYLKGKEPLLQCDKELIQEVLFDAVVSA	0.549654
sp|Q8IZS8|CA2D3_HUMAN	969	SDMTAKAQKLKQTLEPCDTEYPAFVSERTIKET	0.317513
sp|Q8IZS8|CA2D3_HUMAN	991	AFVSERTIKETTGNIACEDCSKSFVIQQIPSSN	0.303488
sp|Q8IZS8|CA2D3_HUMAN	1055	KCERLKAQKIRRRPESCHGFHPEENARECGGAP	0.324633
sp|Q5BJE1|CC178_HUMAN	23	VSSSSTRDDQTNIGLTCQEVKALREKAWSRTNE	0.395391
sp|Q5BJE1|CC178_HUMAN	156	TTPVKEVKPGEKRDEKCPELKQEMETLLSEAIR	0.508875
sp|Q5BJE1|CC178_HUMAN	312	DLHRKVNEELEEALEACENARLKAQQIKEEIDK	0.547831
sp|Q5BJE1|CC178_HUMAN	446	IELSDVAKDFSAISLACTKLTEDNKKLEIDINK	0.342072
sp|Q5BJE1|CC178_HUMAN	720	EHAQTVFDHYMQEKKDCEERIFEEDQRFRVLLA	0.344154
sp|Q5BJE1|CC178_HUMAN	798	DKQLSLDTSIRDKKQLCQLQRRMHTLWQEHFKL	0.304992
sp|P60827|C1QT8_HUMAN	112	QGRRGQKGQVGPPGAACRRAYAAFSVGRREGLH	0.520581
sp|Q63515|C4BPB_RAT	217	SALEKAILAFQESKDLCNATENFVRQLREGGIT	0.53255
sp|Q8CG16|C1RA_MOUSE	88	YDYVKISADKQTLGRFCGQLDSPLGNPPGSKEF	0.266885
sp|Q8CG16|C1RA_MOUSE	267	YDQLQIYANGKNLGEFCGKQRPPDLDTSSNAVD	0.257836
sp|Q8CG16|C1RA_MOUSE	308	GDSRGWKLHYTTETIKCPQPKALDEFTIIQDPQ	0.52594
sp|Q8CG16|C1RA_MOUSE	450	WKNEEEGEKMPRCLPVCGKPVNPVTQKERIIRG	0.288389
sp|Q96MC4|C295L_HUMAN	2	***************MCSGWSSSVIWRHTQFAV	0.355386
sp|Q96MC4|C295L_HUMAN	238	KRKGRPEPSTKSGGGRCAIHPRRSKGADLERSN	0.342483
sp|Q96MC4|C295L_HUMAN	287	KGTARAGRRQLGKGAVCFVPALTSRSQGQSLEG	0.302919
sp|Q96MC4|C295L_HUMAN	329	PADSSCRREAVSPASQCTLREKNKWQKELELAF	0.412088
sp|Q96MC4|C295L_HUMAN	360	AFEELFNINRKLKKHLCLYLALKPRMDQRPGEG	0.365512
sp|Q96MC4|C295L_HUMAN	385	MDQRPGEGHAFSEMQECGAGTPRGKKMADPEML	0.271906
sp|Q9NPY3|C1QR1_HUMAN	53	YTAHSGKLSAAEAQNHCNQNGGNLATVKSKEEA	0.473612
sp|Q9NPY3|C1QR1_HUMAN	104	ARMSKFWIGLQREKGKCLDPSLPLKGFSWVGGG	0.575293
sp|Q9NPY3|C1QR1_HUMAN	311	DDLVTCASRNPCSSSPCRGGATCVLGPHGKNYT	0.302565
sp|P07245|C1TC_YEAST	11	******MAGQVLDGKACAQQFRSNIANEIKSIQ	0.564744
sp|P07245|C1TC_YEAST	144	NIGELNKKNGHPFFLPCTPKGIIELLHKANVTI	0.550097
sp|P07245|C1TC_YEAST	257	VGTNYVADPSKKSGFKCVGDVEFNEAIKYVHLI	0.427791
sp|P07245|C1TC_YEAST	612	VAADVNRSPVTVEDVGCTGALTALLRDAIKPNL	0.404147
sp|P07245|C1TC_YEAST	751	YTEENIEFVEKGAANMCKQIANIKQFGVPVVVA	0.369788
sp|P07245|C1TC_YEAST	875	RKIDMYKEQGFGNLPICIAKTQYSLSHDATLKG	0.434948
sp|P37366|CCL1_YEAST	364	PPSTEEAKKIAAKNYYCQNPSTLIQKLKRKLNG	0.51908
sp|O15444|CCL25_HUMAN	75	NLPAAIFYLPKRHRKVCGNPKSREVQRAMKLLD	0.46224
sp|P35219|CAH8_HUMAN	200	EILQDIQYKGKSKTIPCFNPNTLLPDPLLRDYW	0.277415
sp|Q9NYQ6|CELR1_HUMAN	48	EPRVPGGTRAFALRPGCTYAVGAACTPRAPREL	0.421337
sp|Q9NYQ6|CELR1_HUMAN	56	RAFALRPGCTYAVGAACTPRAPRELLDVGRDGR	0.307119
sp|Q9NYQ6|CELR1_HUMAN	114	PTALSRRLRARTHLPGCGARARLCGTGARLCGA	0.466662
sp|Q9NYQ6|CELR1_HUMAN	121	LRARTHLPGCGARARLCGTGARLCGALCFPVPG	0.247475
sp|Q9NYQ6|CELR1_HUMAN	185	RPICLPPGGSVRLRLLCALRRAAGAVRVGLALE	0.284557
sp|Q9NYQ6|CELR1_HUMAN	1440	GGFHCVCPPGEYERPYCEVTTRSFPPQSFVTFR	0.383861
sp|Q9NYQ6|CELR1_HUMAN	1579	DTTMAVRFGKDIGNYSCAAQGTQTGSKKSLDLT	0.429657
sp|Q9NYQ6|CELR1_HUMAN	1840	GGASEDKVSVRRGFRGCMQGVRMGGTPTNVATL	0.396954
sp|Q9NYQ6|CELR1_HUMAN	2078	GIWWPQTKFGQPAAVPCPKGSVGNAVRHCSGEK	0.582081
sp|Q9NYQ6|CELR1_HUMAN	2090	AAVPCPKGSVGNAVRHCSGEKGWLPPELFNCTT	0.454609
sp|Q9NYQ6|CELR1_HUMAN	2740	EDSATTRATLLTRSLNCNTTFGDGPDMLRTDLG	0.299707
sp|Q9NYQ6|CELR1_HUMAN	2957	LTEQTLKGRLREKLADCEQSPTSSRTSSLGSGG	0.458243
sp|Q9NYQ6|CELR1_HUMAN	2976	SPTSSRTSSLGSGGPDCAITVKSPGREPGRDHL	0.419801
sp|C4Z3R4|CH60_EUBE2	125	GANPIVLRKGMKKATDCAVEAIAGMSEKVTGKD	0.526068
sp|O75976|CBPD_HUMAN	195	LPSLNPDGFERAREGDCGFGDGGPSGASGRDNS	0.352981
sp|O75976|CBPD_HUMAN	309	KAYASNHPIMKTGEPHCPGDEDETFKDGITNGA	0.494914
sp|O75976|CBPD_HUMAN	720	ALSYSKENSQMFQGRPCKNMYPNEYFPHGITNG	0.256544		oxidation		SOH
sp|O75976|CBPD_HUMAN	1049	VPSLNPDGRERAQEKDCTSKIGQTNARGKDLDT	0.30449
sp|Q6PRD7|CEMP1_HUMAN	57	LPGPAQAGAGQPLPKGCAAVKAEVGIPAPHTSQ	0.458915
sp|Q6PRD7|CEMP1_HUMAN	218	AVLRAKRAPEAHPPRSCSGSLTARVCHMGVCQG	0.671227
sp|A0A0U1RRI6|CENL3_HUMAN	40	TAQRRRRKRPGDPPAACAAIAVMGASRAQCPRV	0.48191
sp|A0A0U1RRI6|CENL3_HUMAN	53	PAACAAIAVMGASRAQCPRVQVGVGSHAAAKRW	0.258992
sp|A0A0U1RRI6|CENL3_HUMAN	129	AQRERWETFRKLWGLSCEGAAKVLLDTFEYPGL	0.435686
sp|A0A0U1RRI6|CENL3_HUMAN	240	FHAAVSDPRVYGVAPHCLDEGTVRSVVIEEVGG	0.388483
sp|A0A0U1RRI6|CENL3_HUMAN	281	EEHKAIHKTSSQSAPACPREQEQ**********	0.53434
sp|P85001|CE290_DANRE	878	MAETGRKIVVLRVNEKCLTRRYTTLLELEQHLR	0.321923
sp|P85001|CE290_DANRE	2084	KDLPRLKDQVSDLKEMCSVLKKEKAEVEKRLSH	0.394391
sp|Q8N9R6|CDRT4_HUMAN	128	PTMIPEPTHLHADSRDCPTENYNKIIFARKPMM	0.339039
sp|Q8IYX8|CE57L_HUMAN	126	KQKKDISIQLSSAQSRCTLLEKQLEYTKRMVLN	0.39063
sp|Q8IYX8|CE57L_HUMAN	262	SSKKTKCIKRRPPWQICSKFGALPFVAEKMRQH	0.336456
sp|Q8IYX8|CE57L_HUMAN	295	RDPHILQKPFNVTETRCLPKPSRTTSWCKAIPP	0.29151
sp|Q8IYX8|CE57L_HUMAN	426	DSYPKGSKNIKNSPRKCLTDTNLFQKNSSFHPI	0.394854
sp|Q8NAJ2|CI106_HUMAN	105	QGCELHEGRNHMAVHSCVARAWPGDPQEVRHLN	0.320026
sp|Q8NAJ2|CI106_HUMAN	203	RGCDLRGGRGKHGPRPCCPLLRKFPVLPVHPWP	0.256978
sp|Q8NAJ2|CI106_HUMAN	204	GCDLRGGRGKHGPRPCCPLLRKFPVLPVHPWPF	0.291464
sp|P30409|CD9_CHLAE	9	********MPVKGGTKCIKYLLFGFNFIFWLAG	0.54925
sp|P30409|CD9_CHLAE	181	DICPKKDVLETFTIKSCPDAIKEVFDNKFHIIG	0.67915
sp|O75838|CIB2_HUMAN	149	ARLTKSELDEEEVVLVCDKVIEEADLDGDGKLG	0.357185
sp|Q8IWY9|CDAN1_HUMAN	270	LRKERSKQLQQSPTPTCPTPELGSPLPSRTGSL	0.319518
sp|Q8IWY9|CDAN1_HUMAN	400	LDKGTLKLLAENERLLCFSPALQGRLRAAYEGS	0.344707
sp|Q8IWY9|CDAN1_HUMAN	877	SLRRTVEFVAERIGSNCVKHIKATLVADLVRQA	0.395236
sp|Q8IWY9|CDAN1_HUMAN	1213	NLFLAEPHLPEPQLRACELVQPNRGTVLAQS**	0.433017				SOH
sp|Q6PC40|CD123_DANRE	9	********MKKEQVVNCQFSVWYPLFKKHTIKS	0.335478
sp|Q6PC40|CD123_DANRE	101	PEFNVKVQEAINVLGGCIFPKLNWSAPRDANWI	0.425333
sp|O43916|CHST1_HUMAN	3	**************MQCSWKAVLLLALASIAIQ	0.507326
sp|O43916|CHST1_HUMAN	34	IQYTAIRTFTAKSFHTCPGLAEAGLAERLCEES	0.289139
sp|Q7LGC8|CHST3_HUMAN	11	******MEKGLTLPQDCRDFVHSLKMRSKYALF	0.623379
sp|Q7LGC8|CHST3_HUMAN	264	KNRRCGPLNVTLAAEACRRKEHMALKAVRIRQL	0.323282
sp|Q7LGC8|CHST3_HUMAN	345	GQDGLREEEVQRLRGNCESIRLSAELGLRQPAW	0.337002
sp|P06729|CD2_HUMAN	5	************MSFPCKFVASFLLIFNVSSKG	0.505444
sp|P06729|CD2_HUMAN	186	RVITHKWTTSLSAKFKCTAGNKVSKESSVEPVS	0.324722
sp|P06729|CD2_HUMAN	203	TAGNKVSKESSVEPVSCPEKGLDIYLIIGICGG	0.741646
sp|Q7L1S5|CHST9_HUMAN	217	HTVSRIYVEDKHKILYCEVPKAGCSNWKRILMV	0.469172
sp|Q7L1S5|CHST9_HUMAN	224	VEDKHKILYCEVPKAGCSNWKRILMVLNGLASS	0.360163
sp|Q7L1S5|CHST9_HUMAN	318	HPVFGKAIIKKYRPNACEEALINGSGVKFKEFI	0.605846
sp|P45895|CHSSB_CAEEL	541	KDVLPARKLLARQARLCLFPTEEARKTRMVVAV	0.45924
sp|Q568D2|CF161_DANRE	300	QQEEHKENQEDTQVKDCS***************	0.471308
sp|Q80DV6|A18_CWPXG	137	ITTCYLMATHGRKTVICVPNKMLIHQWKTQVEA	0.464659
sp|Q80DV6|A18_CWPXG	193	PDVLIVVSRHLTNDAFCKYINKHYDLFILDESH	0.390844
sp|Q80DV6|A18_CWPXG	246	MCYFLTATPRPANRIYCNSIINIAKLSDLKKTI	0.358302
sp|Q80DV6|A18_CWPXG	474	KQESYRKHQESDPTSACTASSREERVLNRIFNS	0.455525
sp|Q8WWZ4|ABCAA_HUMAN	606	DILADRKVFLSNGKLKCAGSSLFLKRKWGIGYH	0.577693
sp|Q8WWZ4|ABCAA_HUMAN	631	RKWGIGYHLSLHRNEMCDTEKITSLIKQHIPDA	0.336624
sp|Q8WWZ4|ABCAA_HUMAN	679	LEKTNKFPDLYSDLDKCSDQGIRNYAVSVTSLN	0.272824
sp|Q8WWZ4|ABCAA_HUMAN	885	AIIVSGDQKDYRFSVACNTKKLNCFPVLMGIVS	0.495477
sp|Q8WWZ4|ABCAA_HUMAN	1212	ITASCLHKEYYETKKSCFSTRKKKIAIRNVSFC	0.329023
sp|Q8WWZ4|ABCAA_HUMAN	1228	CFSTRKKKIAIRNVSFCVKKGEVLGLLGHNGAG	0.44046
sp|Q8WWZ4|ABCAA_HUMAN	1255	GHNGAGKSTSIKMITGCTKPTAGVVVLQGSRAS	0.370339
sp|Q9QUI6|ACKR1_MOUSE	4	*************MGNCLYPVETLSLDKNGTQF	0.478286
sp|Q9QUI6|ACKR1_MOUSE	274	LIFDALVRSKTVLLYTCQSQKILDAMLNVTEAL	0.420883
sp|P21114|A26_VACCC	43	KSMIDETWDKKIEANTCISRKHRNIIHEVIRDF	0.409516
sp|P21114|A26_VACCC	211	GSQRRMKAEREIARKNCGGNPCERELKSERSNV	0.366034
sp|P21114|A26_VACCC	216	MKAEREIARKNCGGNPCERELKSERSNVKRLEY	0.329876
sp|P08173|ACM4_HUMAN	133	NASVMNLLIISFDRYFCVTKPLTYPARRTTKMA	0.330596
sp|P08173|ACM4_HUMAN	470	ALCNATFKKTFRHLLLCQYRNIGTAR*******	0.390903
sp|P0DSQ8|A49_VARV	93	YQNELINSLDDNKIIDCIVNKFMSFYKDNLENI	0.32003
sp|P28223|5HT2A_HUMAN	268	ITYFLTIKSLQKEATLCVSDLGTRAKLASFSFL	0.325863
sp|P28223|5HT2A_HUMAN	322	YTGRRTMQSISNEQKACKVLGIVFFLFVVMWCP	0.256973
sp|P28223|5HT2A_HUMAN	443	GQKKNSKQDAKTTDNDCSMVALGKQHSEEASKD	0.335055
sp|P28223|5HT2A_HUMAN	470	EEASKDNSDGVNEKVSCV***************	0.487921
sp|P30939|5HT1F_HUMAN	364	TIFNEDFKKAFQKLVRCRC**************	0.257154
sp|P30939|5HT1F_HUMAN	366	FNEDFKKAFQKLVRCRC****************	0.261907
sp|A6NHY2|AKD1B_HUMAN	358	ADRGNVELVETLLKAGCDLKAVDKQGKTALAVA	0.524077
sp|A6NHY2|AKD1B_HUMAN	525	EKTRHFKSKTDSNSKKCVVS*************	0.441872
sp|O43707|ACTN4_HUMAN	282	HAFSGAQKAETAANRICKVLAVNQENEHLMEDY	0.36262		oxidation	succination	SOH
sp|O43707|ACTN4_HUMAN	351	FRDYRRVHKPPKVQEKCQLEINFNTLQTKLRLS	0.28165	carbonylation	oxidation		SOH
sp|O43707|ACTN4_HUMAN	879	TAEELRRELPPDQAEYCIARMAPYQGPDAVPGA	0.428169
sp|P02768|ALBU_HUMAN	77	EDHVKLVNEVTEFAKTCVADESAENCDKSLHTL	0.406302
sp|P02768|ALBU_HUMAN	125	GEMADCCAKQEPERNECFLQHKDDNPNLPRLVR	0.3467
sp|P02768|ALBU_HUMAN	192	PELLFFAKRYKAAFTECCQAADKAACLLPKLDE	0.292903
sp|P02768|ALBU_HUMAN	193	ELLFFAKRYKAAFTECCQAADKAACLLPKLDEL	0.305921
sp|P02768|ALBU_HUMAN	201	YKAAFTECCQAADKAACLLPKLDELRDEGKASS	0.356282
sp|P02768|ALBU_HUMAN	224	ELRDEGKASSAKQRLKCASLQKFGERAFKAWAV	0.393439
sp|P02768|ALBU_HUMAN	416	EFKPLVEEPQNLIKQNCELFEQLGEYKFQNALL	0.307727
sp|Q28524|ADRB3_MACMU	266	SSPALSRSLAPAPAGTCAPPEGVPACCRRPARL	0.288604
sp|Q28524|ADRB3_MACMU	372	FRRLLCHCGGRLPREPCAADRPASSPRAPLRPG	0.2638
sp|Q6A9W5|AMPA_CUTAK	150	VSAEQVRIAAEGALLGCYKVPTITATSNEPEIS	0.361645
sp|Q6DGA6|ALLC_DANRE	166	KEVVPVTKLKAGYSDTCHNYLSVSYPHRVTHIR	0.365586
sp|Q6DGA6|ALLC_DANRE	307	KIELDTNHFKGNFPDSCRIEACSLTEDEENSFI	0.251963
sp|Q6DGA6|ALLC_DANRE	360	MKAHHRHVFSGPSLVHCGPVSHVRMVIAPDGGI	0.257374
sp|Q9BZ11|ADA33_HUMAN	578	HFLPCAGRDALCGKLQCQGGKPSLLAPHMVPVD	0.251953
sp|Q8IZF3|AGRF4_HUMAN	90	IGFTCNQKKWQKSAETCTSLSVEKLFKDSTGAS	0.342967
sp|Q8IZF3|AGRF4_HUMAN	349	ILTFEKINKTRNARAQCVGWHSKKRRWDEKACQ	0.360017
sp|O00253|AGRP_HUMAN	129	FNAFCYCRKLGTAMNPCSRT*************	0.54256
sp|P43238|ALL12_ARAHY	38	ATHAKSSPYQKKTENPCAQRCLQSCQQEPDDLK	0.388125
sp|Q9BY15|AGRE3_HUMAN	117	RLHSGNEQFSNSNENTCQDTTSSKTTEGRKELQ	0.249696
sp|Q7Z2E3|APTX_HUMAN	161	EAEAGTGLEPGSNSGQCSVPLKKGKDAPIKKES	0.406086
sp|P60710|ACTB_MOUSE	374	SKQEYDESGPSIVHRKCF***************	0.454234
sp|Q32M45|ANO4_HUMAN	808	TSDFIPRLVYAYKYGPCAGQGEAGQKCMVGYVN	0.681189
sp|I3ZNU9|ARMB_ARMME	612	MFLGLDRGHFLSPTGQCKAFDASADGYSRSEGC	0.385055
sp|I3ZNU9|ARMB_ARMME	1456	KFNRMAPVVSRRTAAICSGEDDEAEVITTRTAY	0.402803
sp|A6NFN9|ANKUB_HUMAN	231	GARPHEAVGVHPYRAWCHEALHADVSKCPIHAA	0.266577
sp|A6NFN9|ANKUB_HUMAN	289	AGQTPLTIVFKHKHKDCVLYLLSKMWSTVSFPK	0.364368
sp|A6NFN9|ANKUB_HUMAN	334	QWILRAQSHSLHKSQFCGARVFGAKVGDTVMVD	0.406118
sp|A6NFN9|ANKUB_HUMAN	497	SFLEHSGKTPWENAIYCLAVAR***********	0.325155
sp|A0A2U8U2L2|ASL2_SARSH	109	TSGVWDLTKMECTPFLCGVRKGL**********	0.2696
sp|C0SDW6|AMPP2_PARBP	228	ANRVSTAAHIAVLQGICKMTNEAQIEGSFLNTC	0.292662
sp|Q6ZW76|ANKS3_HUMAN	249	YRSPEKYEDLSSSDESCPAPQRQRPCRKKGVSI	0.310679
sp|Q6ZW76|ANKS3_HUMAN	519	RLEAEMQELAIQLHKRCEEVEATRGQVCQEQEL	0.378105
sp|Q6ZW76|ANKS3_HUMAN	530	QLHKRCEEVEATRGQVCQEQELRAVVESCLLEQ	0.382677
sp|Q6ZW76|ANKS3_HUMAN	577	WALARDAALVLDQLRACQAELSSRVRQDQPPGA	0.355747
sp|Q6ICH7|ASPH2_HUMAN	13	****MVWAPLGPPRTDCLTLLHTPSKDSPKMSL	0.380689
sp|Q8BGV9|ATG4D_MOUSE	263	YGPSVVAHILRKAVESCSEVSRLVVYVSQDCTV	0.72459
sp|Q8BGV9|ATG4D_MOUSE	320	VPVRLGGETLNPVYVPCVKELLRSELCLGIMGG	0.567648
sp|B9KE09|AROC_CAMLR	171	VGSIDSKLSNDEFDFNCAKNSEVYALDKNLEQS	0.288929
sp|B9KE09|AROC_CAMLR	322	IQGENIIRELKGRHDPCVGIRGSIVVNAMVAIC	0.594883
sp|Q8WYN0|ATG4A_HUMAN	217	PDSLTASNQSKGTSAYCSAWKPLLLIVPLRLGI	0.40367
sp|Q4L6N8|AROK_STAHJ	73	VGEIGFRKIEYNYLTECTKKYDVIATGGGVIEY	0.471269
sp|A1AHR5|ATPG_ECOK1	88	DVKRVGYLVVSTDRGLCGGLNINLFKKLLAEMK	0.538372
sp|A1AHR5|ATPG_ECOK1	113	KKLLAEMKTWTDKGVQCDLAMIGSKGVSFFNSV	0.296333
sp|P36542|ATPG_HUMAN	103	DKKKHLLIGVSSDRGLCGAIHSSIAKQMKSEVA	0.507629		oxidation		SOH
sp|Q9H165|BC11A_HUMAN	71	FPLGDILIFIEHKRKQCNGSLCLEKAVDKPPSP	0.300485
sp|Q9H165|BC11A_HUMAN	76	ILIFIEHKRKQCNGSLCLEKAVDKPPSPSPIEM	0.3567
sp|Q9H165|BC11A_HUMAN	585	KHKRGHLAEAEGHRDTCDEDSVAGESDRIDDGT	0.386457
sp|Q9H165|BC11A_HUMAN	607	AGESDRIDDGTVNGRGCSPGESASGGLSKKLLL	0.554238
sp|P22004|BMP6_HUMAN	262	PEGEVVTAAEFRIYKDCVMGSFKNQTFLISIYQ	0.378887
sp|P22004|BMP6_HUMAN	477	VQTLVHLMNPEYVPKPCCAPTKLNAISVLYFDD	0.485805
sp|P22004|BMP6_HUMAN	478	QTLVHLMNPEYVPKPCCAPTKLNAISVLYFDDN	0.472945
sp|P22004|BMP6_HUMAN	510	NSNVILKKYRNMVVRACGCH*************	0.35441
sp|P22004|BMP6_HUMAN	512	NVILKKYRNMVVRACGCH***************	0.331071
sp|Q2GLB4|BIOB_ANAPZ	113	FAAAWRNLHDRDVDRICEFVKAIKEEGLESCAS	0.27003
sp|P14347|BFRF2_EBVB9	17	MALFLARHTLSGTGAGCHGRGPAPDVSEVDLTL	0.431618
sp|P14347|BFRF2_EBVB9	174	AFSDRIAAWICDRSPFCENTRAVARGYRGLVKR	0.370366
sp|P14347|BFRF2_EBVB9	216	SYDPPLLRQNSRPVERCFAIKNYVPGLDSQSCV	0.340769
sp|P14347|BFRF2_EBVB9	337	KTGGGVGEELVGAGGPCLSRDVFVAIVSRNVLS	0.549497
sp|P14347|BFRF2_EBVB9	354	LSRDVFVAIVSRNVLSCLLNVPAAGPRAYKCFR	0.535438
sp|P14347|BFRF2_EBVB9	430	TLQFYPRDQKEKHVLTCHASGRVYCSNCGSAAV	0.384975
sp|P27402|BEL1_SFV3L	101	PDPEKMSKWACARLILCGLYNAKKAKELLKMDY	0.360433
sp|Q6AI39|BICRL_HUMAN	618	PGTGTQQQFFCQAQKKCLNQTSPISAPKTTDGL	0.273172
sp|Q6AI39|BICRL_HUMAN	899	NHIVVSAEGNISKKTECLGRALKFDKVGLVQYQ	0.506527
sp|Q6AI39|BICRL_HUMAN	933	TSEEKASRREPLKASQCSPGPEGHRKTSSRSDH	0.511174
sp|Q8A7S9|BIOC_BACTN	43	IANKMIRLLQKHIPSPCPKVIEFGCGTGIYSRM	0.483588
sp|A1A918|BIOF_ECOK1	220	DDAHGTGVIGEQGRGSCWLQKVKPELLVVTFGK	0.275109
sp|P03228|BARF1_EBVB9	201	VAVDLSLPKPWHLPVTCVGKNDKEEAHGVYVSG	0.305803
sp|Q9C0J9|BHE41_HUMAN	63	LPHRLIEKKRRDRINECIAQLKDLLPEHLKLTT	0.567611
sp|Q9C0J9|BHE41_HUMAN	203	SKGTGAPSAAGSAAAPCLERAGQKLEPLAYCVP	0.579203
sp|Q9C0J9|BHE41_HUMAN	414	AAAAAAAAAAAAAAFPCLSSVLSPPPEKAGAAA	0.315372
sp|O95861|BPNT1_HUMAN	42	VRRVIAEGDLGIVEKTCATDLQTKADRLAQMSI	0.597072				SOH
sp|O95861|BPNT1_HUMAN	59	ATDLQTKADRLAQMSICSSLARKFPKLTIIGEE	0.340988
sp|O95861|BPNT1_HUMAN	100	QELIEDSQWEEILKQPCPSQYSAIKEEDLVVWV	0.422868
sp|O95861|BPNT1_HUMAN	243	QLIEGKASAYVFASPGCKKWDTCAPEVILHAVG	0.37181
sp|P47040|BTN1_YEAST	405	LEPKLCRHQIADDRPWCRME*************	0.268163
sp|Q6UX41|BTNL8_HUMAN	302	HAVEVTLDPETAHPKLCVSDLKTVTHRKAPQEV	0.312169
sp|O14503|BHE40_HUMAN	13	****MERIPSAQPPPACLPKAPGLEHGDLPGMY	0.652316
sp|O14503|BHE40_HUMAN	71	LPHRLIEKKRRDRINECIAQLKDLLPEHLKLTT	0.567611
sp|O14503|BHE40_HUMAN	219	EKPSSPAKGSEGPGKNCVPVIQRTFAHSSGEQS	0.627952
sp|O14503|BHE40_HUMAN	260	GYGGESEKGDLRSEQPCFKSDHGRRFTMGERIG	0.31774
sp|Q76B58|BRNP3_HUMAN	765	FNAKLPNTMDYDTTKLCS***************	0.455498
sp|P51587|BRCA2_HUMAN	161	VLQCTHVTPQRDKSVVCGSLFHTPKFVKGRQTP	0.281182
sp|P51587|BRCA2_HUMAN	341	TSKTRKKIFHEANADECEKSKNQVKEKYSFVSE	0.493498
sp|P51587|BRCA2_HUMAN	419	LNGAQMEKIPLLHISSCDQNISEKDLLDTENKR	0.328475
sp|P51587|BRCA2_HUMAN	546	KKETEASESGLEIHTVCSQKEDSLCPNLIDNGS	0.320652
sp|P51587|BRCA2_HUMAN	738	KSKKVSDIKEEVLAAACHPVQHSKVEYSDTDFQ	0.568041
sp|P51587|BRCA2_HUMAN	822	DVELTKNIPMEKNQDVCALNENYKNVELLPPEK	0.498967
sp|P51587|BRCA2_HUMAN	1200	GTVEIKRKFAGLLKNDCNKSASGYLTDENEVGF	0.40686
sp|P51587|BRCA2_HUMAN	1348	HNLEFDGSDSSKNDTVCIHKDETDLLFTDQHNI	0.396316
sp|P51587|BRCA2_HUMAN	1399	DLSDLTFLEVAKAQEACHGNTSNKEQLTATKTE	0.533113
sp|P51587|BRCA2_HUMAN	1853	FEVGPPAFRIASGKIVCVSHETIKKVKDIFTDS	0.517368
sp|P51587|BRCA2_HUMAN	1885	SFSKVIKENNENKSKICQTKIMAGCYEALDDSE	0.425593
sp|P51587|BRCA2_HUMAN	1948	HNQNMSGLEKVSKISPCDVSLETSDICKCSIGK	0.282432
sp|P51587|BRCA2_HUMAN	2117	NVSKILPRVDKRNPEHCVNSEMEKTCSKEFKLS	0.479736
sp|P51587|BRCA2_HUMAN	2212	KTETFSDVPVKTNIEVCSTYSKDSENYFETEAV	0.446031
sp|P51587|BRCA2_HUMAN	2473	FNKNNSNQAAAVTFTKCEEEPLDLITSLQNARD	0.310897
sp|P51587|BRCA2_HUMAN	2535	PRISLKAAVGGQVPSACSHKQLYTYGVSKHCIK	0.711793
sp|P51587|BRCA2_HUMAN	2605	PSNDGKAGKEEFYRALCDTPGVDPKLISRIWVY	0.618838
sp|P51587|BRCA2_HUMAN	2646	KLAAMECAFPKEFANRCLSPERVLLQLKYRYDT	0.408551
sp|P51587|BRCA2_HUMAN	3173	ETFNKMKNTVENIDILCNEAENKLMHILHANDP	0.553015
sp|P51587|BRCA2_HUMAN	3198	HILHANDPKWSTPTKDCTSGPYTAQIIPGTGNK	0.365141
sp|P51587|BRCA2_HUMAN	3253	RKSVSTPVSAQMTSKSCKGEKEIDDQKNCKKRR	0.254945
sp|P51587|BRCA2_HUMAN	3304	TFVSPAAQKAFQPPRSCGTKYETPIKKKELNSP	0.311913
sp|P51587|BRCA2_HUMAN	3404	TSLIKEQESSQASTEECEKNKQDTITTKKYI**	0.450811
sp|Q9JJ06|C1GLT_MOUSE	115	NLEKKAKHVKATWAQRCNKVLFMSSEENQDFPT	0.284038
sp|Q9JJ06|C1GLT_MOUSE	232	SKEALRRFVNAFKTEKCTHSSSIEDLALGRCME	0.311181
sp|P21075|B17_VACCC	139	VSVKTYKGVKVKKLNRCADHAIVINPFVKFKLT	0.402
sp|P21075|B17_VACCC	312	AITQEHEYVKIALGIVCKLMINNMHSIVGVNHS	0.363821
sp|P20749|BCL3_HUMAN	4	*************MPRCPAGAMDEGPVDLRTRP	0.500215
sp|P20749|BCL3_HUMAN	64	RGAAGLVVPLDPLRGGCDLPAVPGPPHGLARPE	0.350318
sp|P20749|BCL3_HUMAN	213	SPMALDRHGQTAAHLACEHRSPTCLRALLDSAA	0.257235
sp|P20749|BCL3_HUMAN	340	LVRTLVRSGADSSLKNCHNDTPLMVARSRRVID	0.430543
sp|P36716|CAPSP_ADE12	477	ISGVQRVTITDARRRTCPYVYKALGIVSPRVLS	0.590811
sp|Q90X49|CCD80_DANRE	161	DGYYRLMMSLLKPEVYCELAERHVHQIVMFHQE	0.447069
sp|Q6W2J9|BCOR_HUMAN	23	LYGNVHSWMNSERVRMCGASEDRKILVNDGDAS	0.445236
sp|Q6W2J9|BCOR_HUMAN	94	IREGLRVPGNIVYSSLCGLGSEKGREAATSTLG	0.345862
sp|Q6W2J9|BCOR_HUMAN	282	RLSTPSASPAIPPLVHCADKSLPWKMGVSPGNP	0.370006
sp|Q6W2J9|BCOR_HUMAN	494	SGSEIPKETLSPPGNGCAIYRSEIISTAPSSWV	0.476595
sp|Q6W2J9|BCOR_HUMAN	544	KNKALDWAIPQQRSSSCPRMGGTDAVITNVSGS	0.274866
sp|Q6W2J9|BCOR_HUMAN	925	GPAVTFGKTQEDPKPFCVGSAPPSVDVTPTYTK	0.388434
sp|Q6W2J9|BCOR_HUMAN	979	AKRIANSAGYVGDRFKCVTTELYADSSQLSREQ	0.336502
sp|Q6W2J9|BCOR_HUMAN	1197	NHLEDPHYSELTNLKVCIELTGLHPKKQRHLLH	0.320487
sp|Q6W2J9|BCOR_HUMAN	1311	SLSSTSAGGKKQAQPSCAPASRPPAKQQKIKEN	0.571559
sp|Q6W2J9|BCOR_HUMAN	1488	RLGYEEVVLYCLENKICDVNHRDNAGYCALHEA	0.387802
sp|Q6W2J9|BCOR_HUMAN	1709	AEAEFYRQVSASLLFSCSKDLEAFNPESKELLD	0.331053
sp|Q567U6|CCD93_HUMAN	282	EESRLTASSVGQIVGLCSAEIKQIVSEYAEKQS	0.280504
sp|Q13948|CASP_HUMAN	421	SENAALRISNSDLSGRCAELQVRITEAVATATE	0.454163
sp|Q9BXL7|CAR11_HUMAN	150	EVIKLQQQMKAKDLQRCELLARLRQLEDEKKQM	0.280161
sp|Q9BXL7|CAR11_HUMAN	351	ELRDKYLEEKEDLELKCSTLGKDCEMYKHRMNT	0.313803
sp|Q9BXL7|CAR11_HUMAN	396	DQAFHSRDEAQTQYSQCLIEKDKYRKQIRELEE	0.299436
sp|Q9BXL7|CAR11_HUMAN	427	EEKNDEMRIEMVRREACIVNLESKLRRLSKDSN	0.481622
sp|Q9BXL7|CAR11_HUMAN	731	LEGCIRGERQSVPLDTCTKEEAHWTIQRCSGPV	0.305658
sp|Q9BXL7|CAR11_HUMAN	1036	TETIIYSREKNPNAFECIAPANIEAVAAKNKHC	0.406938
sp|Q9QY96|CASR_MOUSE	60	VAAKDQDLKSRPESVECIRYNFRGFRWLQAMIF	0.451959
sp|Q9QY96|CASR_MOUSE	101	PALLPNMTLGYRIFDTCNTVSKALEATLSFVAQ	0.445133
sp|Q9QY96|CASR_MOUSE	449	DIYTCLPGRGLFTNGSCADIKKVEAWQVLKHLR	0.494731
sp|Q9QY96|CASR_MOUSE	542	GKILWSGFSREVPFSNCSRDCQAGTRKGIIEGE	0.250732
sp|P22223|CADH3_HUMAN	460	SKVVEVQEGIPTGEPVCVYTAEDPDKENQKISY	0.333904
sp|P22223|CADH3_HUMAN	556	DVNDHGPVPEPRQITICNQSPVRQVLNITDKDL	0.534394
sp|Q8R5M8|CADM1_MOUSE	67	FTKDVTVIEGEVATISCQVNKSDDSVIQLLNPN	0.28209
sp|Q8R5M8|CADM1_MOUSE	169	DIQKDTAVEGEEIEVNCTAMASKPATTIRWFKG	0.435175
sp|Q8R5M8|CADM1_MOUSE	316	NLFINNLNKTDNGTYRCEASNIVGKAHSDYMLY	0.499349
sp|Q5BKX8|CAVN4_HUMAN	141	MKKNKFRVVIFQEKFRCPTSLSVVKDRNLTENQ	0.392322
sp|Q5BKX8|CAVN4_HUMAN	288	RSLRKGKDRTVAEGEECAREMGVDIIARSESLG	0.492594
sp|P0C698|CAPSD_HBVA9	48	DTSAALYREALESPEHCSPHHTALRQAILCWGE	0.515262
sp|P0C698|CAPSD_HBVA9	185	RSQSPRRRRSQSRESQC****************	0.385266
sp|P55773|CCL23_HUMAN	10	*******MKVSVAALSCLMLVTALGSQARVTKD	0.377363
sp|P55773|CCL23_HUMAN	94	CSKPGVIFLTKKGRRFCANPSDKQVQVCVRMLK	0.508743
sp|P55773|CCL23_HUMAN	105	KGRRFCANPSDKQVQVCVRMLKLDTRIKTRKN*	0.2644
sp|Q91ZX1|C209A_MOUSE	207	MKYWSKGEPNNLGEEDCAEFRDDGWNDTKCTNK	0.334254
sp|Q91ZX1|C209A_MOUSE	235	KCTNKKFWICKKLSTSCPSK*************	0.465923
sp|Q5TID7|CC181_HUMAN	42	LINENEKSDASIIEMACEKEENINQDLKENETV	0.30276
sp|Q5TID7|CC181_HUMAN	301	GEPLAYIAQPPLNRKTCPSSAVNSDRSKGNGKS	0.499432
sp|Q5TID7|CC181_HUMAN	441	EQMKERQTEELRKQEECLFFLKGTEGRERAFKQ	0.294036
sp|Q95JL6|CCD38_MACFA	444	ILIDSLSKKITEVYKVCIGDAEDDGLNPIQKLV	0.365974
sp|Q95JL6|CCD38_MACFA	470	NPIQKLVKVESRLVELCDLIESIPRENVEAIER	0.297254
sp|Q8N5N4|CC022_HUMAN	6	***********MDSSACKKSHQSKKWRIQAQEN	0.448279
sp|Q8N5N4|CC022_HUMAN	127	PRQLAFLLSTRHTEAACPQTSKAAGLSRGLS**	0.542291
sp|Q8TCZ2|C99L2_HUMAN	236	GLNADYVKGENLEAVVCEEPQVKYSTLHTQSAE	0.579643
sp|A2BGP7|CC125_DANRE	47	IKEGGERSNGPFSWTSCRAMYSVFREELEAERV	0.254253
sp|A2BGP7|CC125_DANRE	128	EALRILQGQAILDKATCHTKMLLQKSEERTKAL	0.38165
sp|A2BGP7|CC125_DANRE	230	MLSAKERRDFQRTQPSCSLRTDGSALELAVYGA	0.410295
sp|Q8IWD4|CC117_HUMAN	81	VHCKKKHKREEEEDDDCPVRKKRITEAELCAGP	0.409059
sp|Q1DK38|CAF17_COCIM	181	NWETKDTGDVLREVITCADNRAPAFGYRVLLAG	0.547577
sp|Q1DK38|CAF17_COCIM	342	SAGKFISRIGNVGLALCRLETMTDISLTGESSQ	0.403898
sp|P0CM52|CAF17_CRYNJ	227	LESCMDIHGGVDFRKGCFLGQELTVRTYHTGAT	0.31368
sp|F5H4A9|CC080_HUMAN	46	ALVAPSRGGGGCAELACGERERCCDATNATAVR	0.253754
sp|F5H4A9|CC080_HUMAN	103	ILLVLFAIGYFLQRIICPSPRRYPRGQARPGQR	0.251061
sp|F5H4A9|CC080_HUMAN	177	GGGGRGRGGGGRSDPSCASEHEMRVVSPVFLQL	0.554514
sp|Q52M75|CE027_HUMAN	4	*************MTPCLESFCQRAKDCKQNIP	0.366688
sp|Q52M75|CE027_HUMAN	89	GGRLMSSREVGLRAPRCSCGKRKR*********	0.335854
sp|Q52M75|CE027_HUMAN	91	RLMSSREVGLRAPRCSCGKRKR***********	0.329129
sp|Q5U5Z8|CBPC2_HUMAN	54	LPNSATHQHVRKNNPQCLLNGSLGEKDDLIPDT	0.6129
sp|Q5U5Z8|CBPC2_HUMAN	185	ILSTKRPLQAPRWPIECEVIKENIHHIEWAPPQ	0.265793
sp|Q5U5Z8|CBPC2_HUMAN	571	CDFHGHSRKNNIFLYGCNNNNRKYWLHERVFPL	0.417258
sp|Q5U5Z8|CBPC2_HUMAN	590	NNRKYWLHERVFPLMLCKNAPDKFSFHSCNFKV	0.281756
sp|Q5U5Z8|CBPC2_HUMAN	676	DTLLDFCDPDQMKFTQCLAELKELLRQEIHKKF	0.276953
sp|Q5U5Z8|CBPC2_HUMAN	855	KNKGRMQNKKPGFTVSCSPKRTINSSQEPAPGM	0.439508
sp|C1G565|CHO2_PARBD	146	GIGWLLHMQSNGRTLVCWAKKSNIFVNPSTGQN	0.37683
sp|C1G565|CHO2_PARBD	954	EVVRADGNVRNLAWRICNAKKVLAPYSMSRTNG	0.322855
sp|Q568T5|CHODL_DANRE	123	TREEGDNAQEPGAFASCPNLYRWTDGSVSLFRN	0.255061
sp|Q711Q0|CEFIP_HUMAN	8	*********MMQGNKKCTDAFSDSSSIGSVLDD	0.278218
sp|Q711Q0|CEFIP_HUMAN	316	SKAPKHYGDTTLLREPCPPERTVSPCQVQASCS	0.575333
sp|Q711Q0|CEFIP_HUMAN	351	ENRLAAGALSTSIPWGCRDPGAQVFAVEGKAPS	0.256705
sp|Q711Q0|CEFIP_HUMAN	985	RVKAPPDAAPGLVASNCKSGSADSGKLAAPWHI	0.607589
sp|Q711Q0|CEFIP_HUMAN	1210	TDQAQEKHGESQEGKPCPEDLEQTQQRPLCPRE	0.471547
sp|Q6G0V9|CCMA_BARQU	134	DLAPLPFNVLSTGQKRCVAIARLLLSYRPIWIL	0.443202
sp|Q5VXM1|CDCP2_HUMAN	218	YVAVLGGPGPTRGHHYCGSTRPPTLVSLGHELQ	0.310733
sp|Q96BP2|CHCH1_HUMAN	76	EFRDDACRKEIQGFLDCAARAQEARKMRSIQET	0.320454
sp|Q8N7R7|CCYL1_HUMAN	7	**********MGNTLTCCVSPNASPKLGRRAGS	0.460459
sp|Q8N7R7|CCYL1_HUMAN	8	*********MGNTLTCCVSPNASPKLGRRAGSA	0.430465
sp|Q15078|CD5R1_HUMAN	253	MGNEISYPLKPFLVESCKEAFWDRCLSVINLMS	0.262503
sp|Q6NT52|CGB2_HUMAN	90	VCNYRDVRFESIRLPGCPRGVNPVVSYAVALSC	0.35987
sp|Q6NT52|CGB2_HUMAN	128	RRSTTDCGGPKDHPLTCDDPRFQASSSSKAPPP	0.249846
sp|Q9BUK0|CHCH7_HUMAN	16	*MPSVTQRLRDPDINPCLSESDASTRCLDENNY	0.421383
sp|C8WLM1|CGR2_EGGLE	6	***********MEYGKCRGIERGMGRRDFLKAA	0.443928
sp|C8WLM1|CGR2_EGGLE	265	LADGSFAKARKGVVMACASVDNNLEMSKDLGLM	0.391406
sp|P21127|CD11B_HUMAN	432	IELKQELPKYLPALQGCRSVEEFQCLNRIEEGT	0.328505
sp|P21127|CD11B_HUMAN	440	KYLPALQGCRSVEEFQCLNRIEEGTYGVVYRAK	0.298872
sp|P28330|ACADL_HUMAN	27	RVLGGHRAPRQLPAARCSHSGGEERLETPSAKK	0.350048
sp|P28330|ACADL_HUMAN	342	HLQTVQHKLAELKTHICVTRAFVDNCLQLHEAK	0.49797
sp|P28330|ACADL_HUMAN	366	NCLQLHEAKRLDSATACMAKYWASELQNSVAYD	0.283603
sp|Q2M2I8|AAK1_HUMAN	71	GGFAIVFLVRTSNGMKCALKRMFVNNEHDLQVC	0.350969
sp|Q2M2I8|AAK1_HUMAN	319	DIYQVSYFSFKLLKKECPIPNVQNSPIPAKLPE	0.27604
sp|P04403|2SS1_BEREX	130	EQMRRMMRLAENIPSRCNLSPMRCPMGGSIAGF	0.272083
sp|Q5PCV4|ACCD_SALPA	27	ITPTRKASIPEGVWTKCDSCGQVLYRAELERNL	0.252901
sp|B5KVH4|11S1_CARIL	37	GCLAQSGGRQQHKFGQCQLNRLDALEPTNRIEA	0.344699
sp|B5KVH4|11S1_CARIL	323	QSRRGGRDDNGLEETICTLSLRENIGDPSRADI	0.279948
sp|A7I2H6|ACKA_CAMHC	46	MIEQIGDEVSHSKIETCDGKTIEENMEIRTHDE	0.363131
sp|A7I2H6|ACKA_CAMHC	201	VTKKGADFLGIDYKNFCVISLHIGSGSSISATK	0.369907
sp|P08697|A2AP_HUMAN	70	NQEPGGQTALKSPPGVCSRDPTPEQTHRLARAM	0.450253
sp|P85092|3SI1A_DENAN	3	**************LTCVTSKSIFGITTEDCPD	0.603925
sp|Q5KMX3|1A1D_CRYNJ	48	TAVLGGKVKLYAKREDCNSGLAYGGNKVRKLEY	0.543865
sp|Q5KMX3|1A1D_CRYNJ	74	KVRKLEYLVADAKAKGCNTLVSVGGVQSNHTRA	0.485561
sp|P68592|A17_VACCC	178	QDYRRSINVTIPEQYTCNKPYTAGNKVDVDIPT	0.523253
sp|P11613|ACKR3_CANLF	196	TYYLKTVTSASNNETYCRSFYPEHSVKEWLISM	0.518834
sp|A5A6I5|ALDOA_PANTR	202	IAEPEILPDGDHDLKRCQYVTEKVLAAVYKALS	0.464531
sp|A5A6I5|ALDOA_PANTR	240	LEGTLLKPNMVTPGHACTQKFSHEEIAMATVTA	0.499089			succination
sp|A5A6I5|ALDOA_PANTR	290	GQSEEEASINLNAINKCPLLKPWALTFSYGRAL	0.416083				SOH
sp|A5A6I5|ALDOA_PANTR	339	AAQEEYVKRALANSLACQGKYTPSGQAGAAASE	0.494018	carbonylation	oxidation	succination	SOH
sp|A7GYC8|ACKA_CAMC5	275	DEIDTFLNKKSGLFGICGSSDMRDVVTRMANDE	0.344686
sp|A7GYC8|ACKA_CAMC5	339	FTGGIGENAPNTRQKICDDLKHLGIHVNHDLNF	0.381348
sp|A7GYC8|ACKA_CAMC5	363	IHVNHDLNFSKERGERCLDDKNAKIKTFVIPTN	0.272431
sp|C0M6X6|ACKA_STRE4	386	AASKVKVLVISTDEELCIARDVERLKQTIS***	0.407856
sp|Q5EZC5|ALTA1_PLETA	67	LSFNIKATNEGTLDFTCSAQADKLEDDKFYPCG	0.411351
sp|Q5EZC5|ALTA1_PLETA	133	LPNYCRAGGDGPKDVICQGAS************	0.324022
sp|P78325|ADAM8_HUMAN	310	VDFTGTTVGFARVSAMCSHSSGAVNQDHSKNPV	0.280005
sp|P51828|ADCY7_HUMAN	320	LNELFGKFDQIAKANECMRIKILGDCYYCVSGL	0.285065
sp|P51828|ADCY7_HUMAN	382	GVDINMRVGIHSGNVLCGVIGLRKWQYDVWSHD	0.543104
sp|P51828|ADCY7_HUMAN	790	LGNLTKPNGTTSGTPSCSWKDLKTMTNFYLVLF	0.538501
sp|P51828|ADCY7_HUMAN	1068	GLINVKGKGELRTYFVCTDTAKFQGLGLN****	0.383943
sp|Q9H9G7|AGO3_HUMAN	36	RPGYGTMGKPIKLLANCFQVEIPKIDVYLYEVD	0.487466
sp|Q9H9G7|AGO3_HUMAN	58	PKIDVYLYEVDIKPDKCPRRVNREVVDSMVQHF	0.282131
sp|Q9H9G7|AGO3_HUMAN	273	VKFTKEIKGLKVEVTHCGTMRRKYRVCNVTRRP	0.299095
sp|Q9H9G7|AGO3_HUMAN	328	YFREKYTLQLKYPHLPCLQVGQEQKHTYLPLEV	0.283576
sp|Q9H9G7|AGO3_HUMAN	565	QVKNVIKTSPQTLSNLCLKINVKLGGINNILVP	0.547134
sp|Q9H9G7|AGO3_HUMAN	692	QFRQVLYYELLAIREACISLEKDYQPGITYIVV	0.464909
sp|Q96F25|ALG14_HUMAN	176	GILGIKKVIIVYVESICRVETLSMSGKILFHLS	0.482627
sp|Q53H12|AGK_HUMAN	34	GLCLLTWGGHWLYGKHCDNLLRRAACQEAQVFG	0.289023		oxidation		SOH
sp|Q53H12|AGK_HUMAN	72	PNAQVKKATVFLNPAACKGKARTLFEKNAAPIL	0.562138		oxidation		SOH
sp|Q9UM73|ALK_HUMAN	95	ELKAGRPEARGSLALDCAPLLRLLGPAPGVSWT	0.431878
sp|Q9UM73|ALK_HUMAN	425	SGNRSLSAVDFFALKNCSEGTSPGSKMALQSSF	0.381664
sp|Q9UM73|ALK_HUMAN	548	ATVTSATFPAPIKSSPCELRMSWLIRGVLRGNV	0.355197
sp|Q9UM73|ALK_HUMAN	906	LWAGKSLQEGATGGHSCPQAMKKWGWETRGGFG	0.435194
sp|Q9UM73|ALK_HUMAN	928	KWGWETRGGFGGGGGGCSSGGGGGGYIGGNAAS	0.27639
sp|Q9UM73|ALK_HUMAN	1182	MEALIISKFNHQNIVRCIGVSLQSLPRFILLEL	0.343565
sp|Q9UM73|ALK_HUMAN	1255	YLEENHFIHRDIAARNCLLTCPGPGRVAKIGDF	0.335484
sp|Q9UM73|ALK_HUMAN	1259	NHFIHRDIAARNCLLTCPGPGRVAKIGDFGMAR	0.406839
sp|Q9UM73|ALK_HUMAN	1288	GMARDIYRASYYRKGGCAMLPVKWMPPEAFMEG	0.486562
sp|Q9UM73|ALK_HUMAN	1354	VLEFVTSGGRMDPPKNCPGPVYRIMTQCWQHQP	0.525068
sp|Q9UM73|ALK_HUMAN	1539	AKKEPHDRGNLGLEGSCTVPPNVATGRLPGASL	0.428538
sp|Q53RT3|APRV1_HUMAN	39	PASAPAVSQPTAPAPSCLPKAGQVIPTLLREAP	0.386709
sp|O15084|ANR28_HUMAN	85	AKDSKWLTPLHRAVASCSEEAVQVLLKHSADVN	0.426311
sp|O15084|ANR28_HUMAN	122	NWQTPLHIAAANKAVKCAEALVPLLSNVNVSDR	0.351887
sp|O15084|ANR28_HUMAN	201	HIEVVKLLVSHGAEVTCKDKKSYTPLHAAASSG	0.300521
sp|O15084|ANR28_HUMAN	472	ALVGSGASVNDLDERGCTPLHYAATSDTDGKCL	0.31648
sp|O15084|ANR28_HUMAN	632	LKRTPIHAAATNGHSECLRLLIGNAEPQNAVDI	0.409298
sp|O15084|ANR28_HUMAN	898	ELTLQDNSKNTALHLACSKGHETSALLILEKIT	0.366381
sp|O35298|AOAH_MOUSE	69	LAEVHNSSVQVAMERLCSYLPEKLFLKTACYFL	0.293264
sp|O35298|AOAH_MOUSE	159	LRRSSTMKYPRSGRNICSLPFLTKICQKIELSI	0.26567
sp|O35298|AOAH_MOUSE	248	IWGIDPKDGIPYEKKFCEGSQPRGIILLGDSAG	0.55099
sp|A0A284RE13|ARMB_ARMOS	612	MFLGLDRGHFLSPTGQCKAFDASADGYSRSEGC	0.385055
sp|A0A284RE13|ARMB_ARMOS	1457	KFNRMAPVVSRRTAAICSGEDGEAEVFTTRTAY	0.423311
sp|F5HF49|AN_HCMVM	273	FGVLKQGSGRTLLVEPCARVYEIKCRYKYLRKK	0.382904
sp|F5HF49|AN_HCMVM	372	PLREYLADLLYLNKAECSEVIVFDAKHLNDDNS	0.398711
sp|F5HF49|AN_HCMVM	511	YLVSAIFREREESELGCELLAGGRVFHCDHIPL	0.434873
sp|A0A2U8U2M8|ASR2_SARSH	386	YLDACILEGIRLHPPFCLPFERVVPKGGIMIGK	0.468448
sp|A0A2U8U2M8|ASR2_SARSH	461	QKREAAILTFGAGKRICLGKQIAMLELKKIVAT	0.409397
sp|Q9Y2T2|AP3M1_HUMAN	288	IPVYVKHSISFKENSSCGRFDITIGPKQNMGKT	0.339169
sp|Q6AA78|ARCA_CUTAK	402	VEIKAAELGRGRGGGHCMTCPITRDPVDY****	0.259737
sp|Q6AA78|ARCA_CUTAK	405	KAAELGRGRGGGHCMTCPITRDPVDY*******	0.249632
sp|Q503W7|ATD1B_DANRE	141	RLLQPPKGVLLYGPPGCGKTLIAKATAKEAGFR	0.503495
sp|Q5PIK4|ANMK_SALPA	203	DTGPGNMLMDAWIWRQCAQPYDKDAAWAKEGQV	0.260844
sp|Q5PIK4|ANMK_SALPA	294	IAQQVLLNGGCERLMVCGGGGRNPLVMARLAAL	0.391394
sp|Q8WXK1|ASB15_HUMAN	33	IQLSIQESIEASKTALCPERFVPLSAQNRKLVE	0.455734
sp|Q8WXK1|ASB15_HUMAN	109	EIVLDASYKTLWEFKTCDGETPLTLAVKAGLVE	0.263692
sp|Q8WXK1|ASB15_HUMAN	174	DMVSTLIKHNTSLDQPCVKRWSAMHEAAKQGRK	0.421783
sp|Q8WXK1|ASB15_HUMAN	535	EVQREWPEIRQILENPCSLKHLCRLKIRRLMGL	0.280644
sp|Q8WXK1|ASB15_HUMAN	555	HLCRLKIRRLMGLQKLCQPASVEKLPLPPAIQR	0.317368
sp|Q9H9F9|ARP5_HUMAN	48	PLVLDNGSFQVRAGWACPGQDPGPEPRLQFRAV	0.35378
sp|Q9H9F9|ARP5_HUMAN	569	TRKEYEEKGGEYLKEHCASNIYVPIRLPKQASR	0.465709
sp|Q16853|AOC3_HUMAN	95	LGPGLVDAAQARPSDNCVFSVELQLPPKAAALA	0.318661
sp|Q6G1W7|ATPA_BARHE	87	VGVVIFGSDRDIREGDCVKRLGAIVEVPVGPAL	0.310938
sp|Q6G1W7|ATPA_BARHE	203	KPFHEKDAGNEKDKVYCIYVAIGQKRSTVAQFV	0.253366
sp|Q9NQS1|AVEN_HUMAN	169	SQFRFAEEKEWDSEASCPKQNSAFYVDSELLVR	0.365819
sp|Q9NQS1|AVEN_HUMAN	193	YVDSELLVRALQELPLCLRLNVAAELVQGTVPL	0.458444
sp|Q9NQS1|AVEN_HUMAN	251	PGGRGPIFELKSVAAGCPVLLGKDNPSPGPSRD	0.460446
sp|Q9NQS1|AVEN_HUMAN	326	DLKSKEDGEVVQEEEVCAKPSVTEEKNMEPEQP	0.469338				SOH
sp|A6QXC6|ATG7_AJECN	429	VSFSNPVRQPLFGFNDCLGGGAKKALRAAAALE	0.300265
sp|A6QXC6|ATG7_AJECN	565	VVAPADSIKDQTLDQQCTVTRPGIAAIASALLV	0.404678
sp|A6L4M3|ATPD_BACV8	63	ALDNPVLPAETKLKLICEAAGGGKVSEELKRFV	0.543977
sp|A6L4M3|ATPD_BACV8	117	LYRKQKNISVGKITTVCPVAEEVVNRIRALVVE	0.538773
sp|Q8WXF7|ATLA1_HUMAN	322	SPESLDIKEINGNKITCRGLVEYFKAYIKIYQG	0.344782
sp|Q8WXF7|ATLA1_HUMAN	375	AVATAKDTYNKKMEEICGGDKPFLAPNDLQTKH	0.480356
sp|Q2GHX3|ATPA_EHRCR	92	VVFGDERSVGEGDTAKCTGKLMDVPVGLELLGR	0.579251
sp|Q2GHX3|ATPA_EHRCR	203	NQKAHNDVVSEKEKVYCIYVAIGQKNSSVARIV	0.348256
sp|A7I1B2|ATP6_CAMHC	140	FEGIREKGFIKYFAGFCGPVKAIAPFMFVIEVI	0.354619
sp|A6RCS8|ATP23_AJECN	123	TQRQAGGFDPQYGIRICANAMKDQGHLEDTMAH	0.442044
sp|A6RCS8|ATP23_AJECN	163	HLRFKLDWTDNLRHAACTEIRASSLSGECRWAR	0.278769
sp|A6RCS8|ATP23_AJECN	196	EFFRRGQWKLTQQHQECVRRRAALSVMARPACK	0.313094
sp|A6RCS8|ATP23_AJECN	211	ECVRRRAALSVMARPACKDAEHAKQVVDEVWDS	0.400419
sp|A7I1A0|BIOB_CAMHC	175	TYHHNLETSRKFFPKICTTHTYDDRINTIKSAL	0.382991
sp|A7I1A0|BIOB_CAMHC	247	ILTPIKGTPLENSAPLCVDEILRSIAIFRLILP	0.503783
sp|A7I1A0|BIOB_CAMHC	314	TTCGDVAQSDKNLVSECGFVYKKSFDV******	0.367514
sp|G2SYC0|BCACT_ROSHA	99	MSGIERKMINRGVAYYCPIRYSELPRYYRELDC	0.370751
sp|G2SYC0|BCACT_ROSHA	362	DFVLGAYLSKGGKSFICLSSTFKTKDGQVQSRI	0.255256
sp|P22003|BMP5_HUMAN	418	VQTLVHLMFPDHVPKPCCAPTKLNAISVLYFDD	0.46337
sp|P22003|BMP5_HUMAN	419	QTLVHLMFPDHVPKPCCAPTKLNAISVLYFDDS	0.486071
sp|P22003|BMP5_HUMAN	451	SSNVILKKYRNMVVRSCGCH*************	0.322546
sp|P22003|BMP5_HUMAN	453	NVILKKYRNMVVRSCGCH***************	0.307462
sp|P03199|BLLF2_EBVB9	2	***************MCPPVRQHPAQAPPAKRQ	0.450525
sp|P03199|BLLF2_EBVB9	148	PCQSRQRPSPDSQTSPC****************	0.332215
sp|Q9VGI8|BLM_DROME	803	KSLIFDQINKLASLDICAKSLSGEQKMADVMAI	0.348919
sp|Q9VGI8|BLM_DROME	920	TPRVRLDILAQLNLKNCKWFLSSFNRSNLRYRV	0.312806
sp|Q9VGI8|BLM_DROME	1131	GEHFTSEQCLENRETACDNCINKRAYKAVDALE	0.340198
sp|Q9VGI8|BLM_DROME	1134	FTSEQCLENRETACDNCINKRAYKAVDALEHAR	0.397052
sp|Q9VGI8|BLM_DROME	1160	DALEHARKAARAVKDLCSGRSRFTLLHIADVLK	0.354584
sp|Q9VGI8|BLM_DROME	1332	ALKSMAETLPITEKDMCSIPHVTKANFDKYGAK	0.470948
sp|Q6ZT62|BGIN_HUMAN	64	EPAKRAAHNIHKRLQACLQGQSGADMDKRVKKL	0.415755
sp|Q6ZT62|BGIN_HUMAN	110	KELDPDSSMGKALEMSCAIQNQLARILAEFEMT	0.286206
sp|Q6ZT62|BGIN_HUMAN	396	ASLKEPGARLQALQEVCSRLPPENLSNLRYLMK	0.44619
sp|P20290|BTF3_HUMAN	22	APAQADSRGRGRARGGCPGGEATLSQPPPRGGT	0.479673	carbonylation
sp|Q86WA6|BPHL_HUMAN	225	WVDGIRQFKHLPDGNICRHLLPRVQCPALIVHG	0.273445
sp|Q8BJE2|BTNL9_MOUSE	59	PEESILARVGEAVEFPCRLSSYQDAEHMEIRWF	0.423659
sp|Q8BJE2|BTNL9_MOUSE	227	LETSVIVRGGAHSNVSCIIQNPLLPQKKEFVIQ	0.41489
sp|Q8BJE2|BTNL9_MOUSE	369	VPSIAAGDPQRFSEQTCVLSRERFSSGRHYWEV	0.326534
sp|Q9UIG0|BAZ1B_HUMAN	120	DTAWLEIMTKYAVGEECDFEVGKEKMLKVKIVK	0.304254
sp|Q9UIG0|BAZ1B_HUMAN	156	LEKVDEEATEKKSDGACDSPSSDKENSSQIAQD	0.549842		oxidation		SOH
sp|Q9UIG0|BAZ1B_HUMAN	497	YYKENKDREDKRSALSCVISKTARLLSSEDRAR	0.475948
sp|Q9UIG0|BAZ1B_HUMAN	1045	IHSIHLARKPNLGLKSCDGNQELLNFLRSDLIE	0.40629
sp|Q9UIG0|BAZ1B_HUMAN	1348	LQTKRSSRRQSLELQKCEEILHKIVKYRFSWPF	0.31737
sp|P48751|B3A3_HUMAN	236	SRPWSPSASYDLRERLCPGSALGNPGGPEQQVP	0.251518
sp|O95429|BAG4_HUMAN	443	ETGGQDSVRQARKEAVCKIQAILEKLEKKGL**	0.400186
sp|Q8NFC6|BD1L1_HUMAN	74	VNHLKSQGLFDQFRRDCLADVDTKPAYQNLRQR	0.45403			succination
sp|Q8NFC6|BD1L1_HUMAN	285	EGLETAPKSEEFSDLPCPVEEIKNYTKEHNNLI	0.337531
sp|Q8NFC6|BD1L1_HUMAN	607	QQYEEDSKETLKTSEHCEKEKISSSKELKHVHA	0.24946
sp|Q8NFC6|BD1L1_HUMAN	686	ETDTRDVKRQVERSEICTEEPQKQKSTLKNEKH	0.467137
sp|Q8NFC6|BD1L1_HUMAN	1170	MKQKTSATVQKDELRTCTADSKATAPAYKPGRG	0.384688
sp|Q8NFC6|BD1L1_HUMAN	1618	ESETFLTSTKEGESGECAVAESEDRAADLLAVH	0.511015
sp|Q8NFC6|BD1L1_HUMAN	1663	TEEKDDAVTSAGSEEKCDGSLSRDSEIVEGTIT	0.515241
sp|Q8NFC6|BD1L1_HUMAN	1729	NMMRMGPKKETEGTVTCTGAEGRSDNFVICSVT	0.659504
sp|Q8NFC6|BD1L1_HUMAN	1742	TVTCTGAEGRSDNFVICSVTGAGPREERMVTGA	0.327199
sp|Q8NFC6|BD1L1_HUMAN	1849	TVAKEGTNVPLVAAGPCDDEGIVTSTGAKEEDE	0.350347
sp|Q8NFC6|BD1L1_HUMAN	1947	VDSMSGTEKGSKDTDICSSAKGIVESSVTSAVS	0.480813
sp|Q8NFC6|BD1L1_HUMAN	2384	VSKHKVPMPSLIAENNCRCPGPVRGGKEPGPVL	0.286176
sp|Q8NFC6|BD1L1_HUMAN	2427	PSVHKPSAGQGHPSAVCAEKEEKHGKECPEIGP	0.508077	carbonylation
sp|Q8NFC6|BD1L1_HUMAN	2438	HPSAVCAEKEEKHGKECPEIGPFAGRGQKESTL	0.414508
sp|Q8NFC6|BD1L1_HUMAN	2570	AEQQGSEDNLKTSTTKCITGQESKIAPSHTMIP	0.393397
sp|Q8NFC6|BD1L1_HUMAN	2694	SEEEKNGEILAPPESLCGGKPSGIAELQREPLL	0.497405
sp|Q8NFC6|BD1L1_HUMAN	2802	DNPDVLDSRIETAQRQCPETEPHDTKEENSRDL	0.481268
sp|L7YAI7|B4GA1_DANRE	7	**********MHFSKKCSVFKVVLSALLIVALL	0.619177
sp|L7YAI7|B4GA1_DANRE	370	YDESFRQYGFNRISQACELHIAGYRFSVVSNAF	0.25507
sp|L7YAI7|B4GA1_DANRE	431	SFKESLKAKYPTSPRRC****************	0.472517
sp|Q6ZUV0|BACHL_HUMAN	14	***MIKEAGAIISTRHCNPQNGDRCVAALARVE	0.575163
sp|Q6ZUV0|BACHL_HUMAN	22	GAIISTRHCNPQNGDRCVAALARVECTHFLWPM	0.431552
sp|Q921C3|BRWD1_MOUSE	31	ESELYFLIARYLSAGPCRRAAQVLVQELEQYQL	0.350652
sp|Q921C3|BRWD1_MOUSE	82	LVLSNKHVAPDHLLQICQRIGPMLDKEVPPSIS	0.253827
sp|Q921C3|BRWD1_MOUSE	377	IAELESHTDKVDSIQFCNNGDRFLSGSRDGTAR	0.358329
sp|Q921C3|BRWD1_MOUSE	814	TCRRKYANYSRRNADQCELSSGNESSGSVRHET	0.353394
sp|Q921C3|BRWD1_MOUSE	1021	LVKIVGLRYEVGPPTLCCLKLAFIDPATGRLTD	0.328611
sp|Q921C3|BRWD1_MOUSE	1022	VKIVGLRYEVGPPTLCCLKLAFIDPATGRLTDK	0.340285
sp|Q921C3|BRWD1_MOUSE	1381	VRETLEAGNYDSPVEFCKDIRLIFSNAKAYTPN	0.254534
sp|Q921C3|BRWD1_MOUSE	1446	FKEKLRRSQRFKQRQNCNGAVPGDRRRRNVKQK	0.279956
sp|Q921C3|BRWD1_MOUSE	1597	TRAARRKAGSVSLENGCGRKATRKRVYLSDSDN	0.453878
sp|Q921C3|BRWD1_MOUSE	1627	SDNNSVETDENLKNRKCGSSRKVLRKCAAVAAS	0.255003
sp|Q921C3|BRWD1_MOUSE	1637	NLKNRKCGSSRKVLRKCAAVAASKIKLMSDAED	0.405471
sp|Q921C3|BRWD1_MOUSE	1660	KIKLMSDAEDSSSESPCSGRKLPHRNASAVARK	0.288465
sp|Q921C3|BRWD1_MOUSE	1734	SDSDLRATRKTWNANGCTSHTAATCKTKSRPIE	0.353847
sp|Q921C3|BRWD1_MOUSE	1845	GSPVSEALREAILAPQCLSHRGSETDVDSDGGA	0.356693
sp|Q921C3|BRWD1_MOUSE	1953	VCTRSKRRRKKPARFACTPAKTALSSEEKHAHC	0.533676
sp|Q921C3|BRWD1_MOUSE	1969	CTPAKTALSSEEKHAHCEVPEAQPACRNKLPEP	0.254167
sp|Q921C3|BRWD1_MOUSE	2025	SFEQRKSIQSRQMGAVCVRPPPKTQSSSAGLSQ	0.267458
sp|Q921C3|BRWD1_MOUSE	2157	SPKASDLGSVTDSDVDCTDNTQTQRKKKRKGKA	0.311275
sp|Q921C3|BRWD1_MOUSE	2194	KESVRKDREPHTKMRPCMLNEKDAVQMHSDTLK	0.579423
sp|Q921C3|BRWD1_MOUSE	2222	SDTLKAKTVPEKVPRRCATVAANKIKMMCNLKE	0.674489
sp|O75752|B3GL1_HUMAN	300	PEDTNLFFLYRIHLDVCQLRRVIAAHGFSSKEI	0.443411
sp|O75752|B3GL1_HUMAN	329	SKEIITFWQVMLRNTTCHY**************	0.347416
sp|Q9UQB8|BAIP2_HUMAN	137	KKYQTEQRSKGDALDKCQAELKKLRKKSQGSKN	0.338817
sp|Q9UQB8|BAIP2_HUMAN	195	VSDGYKTALTEERRRFCFLVEKQCAVAKNSAAY	0.268104
sp|Q9UQB8|BAIP2_HUMAN	202	ALTEERRRFCFLVEKQCAVAKNSAAYHSKGKEL	0.268745
sp|Q9UQB8|BAIP2_HUMAN	529	NPFAHVQLKPTVTNDRCDLSAQGPEGREHGDGS	0.448254
sp|P19099|C11B2_HUMAN	10	*******MALRAKAEVCVAAPWLSLQRARALGT	0.510482
sp|P19099|C11B2_HUMAN	109	LPEDVEKLQQVDSLHPCRMILEPWVAYRQHRGH	0.255732
sp|Q18515|C1GLT_CAEEL	251	EALKKFIEVALPDKSLCSQNHGGAEDAEMGKCL	0.454402
sp|Q2TBE0|C19L2_HUMAN	214	LNPYWKDGGTGLPPEDCSVSSITKVSVVEDGGL	0.459393
sp|Q2TBE0|C19L2_HUMAN	299	RRERWRKPTYSDKAQNCQESRESDLVKYGNSSR	0.428247
sp|Q2TBE0|C19L2_HUMAN	699	QFPKHLIVAIGVKVYLCLPNVRSLTEGHCLIVP	0.40844
sp|Q1DWP9|BST1_COCIM	62	VPEKATILNDKVKAGPCLSTEKDLGIRKQLALS	0.62721
sp|Q1DWP9|BST1_COCIM	708	LHSSLLAYKLHVESKDCDGTELFKPMVRQYISG	0.377041
sp|Q8N888|BCOR2_HUMAN	53	KVLSNNASSQKPTHSSCIPLLRLPDKQQKVNES	0.458114
sp|Q8N888|BCOR2_HUMAN	76	PDKQQKVNESIKTDMLCTDKEEECPAASLLQKY	0.283102
sp|Q8N888|BCOR2_HUMAN	83	NESIKTDMLCTDKEEECPAASLLQKYTNNSEKP	0.27579
sp|Q8N888|BCOR2_HUMAN	125	HLISQDLRQGFLLTGKCYVENADGKIPLGTCFL	0.308475
sp|P20505|B1_VACCC	83	EEWKKSHNIKHVGLITCKAFGLYKSINVEYRFL	0.366971
sp|P20505|B1_VACCC	240	WLGGILPWTKISETKNCALVSATKQKYVNNTAT	0.507138
sp|Q86VP6|CAND1_HUMAN	71	KLLEDKNGEVQNLAVKCLGPLVSKVKEYQVETI	0.551098
sp|Q86VP6|CAND1_HUMAN	131	GELPPASSGSALAANVCKKITGRLTSAIAKQED	0.279333
sp|Q86VP6|CAND1_HUMAN	237	ELSKNDSMSTTRTYIQCIAAISRQAGHRIGEYL	0.378862		oxidation		SOH
sp|Q86VP6|CAND1_HUMAN	264	RIGEYLEKIIPLVVKFCNVDDDELREYCIQAFE	0.421286				SOH
sp|Q86VP6|CAND1_HUMAN	356	SDDDDMSWKVRRAAAKCLDAVVSTRHEMLPEFY	0.454749
sp|Q86VP6|CAND1_HUMAN	802	QSTALTHKQSYYSIAKCVAALTRACPKEGPAVV	0.439418		oxidation		SOH
sp|Q86VP6|CAND1_HUMAN	810	QSYYSIAKCVAALTRACPKEGPAVVGQFIQDVK	0.251305
sp|Q86VP6|CAND1_HUMAN	954	KHCECAEEGTRNVVAECLGKLTLIDPETLLPRL	0.296307
sp|Q86VP6|CAND1_HUMAN	1007	FTISDHPQPIDPLLKNCIGDFLKTLEDPDLNVR	0.395845		oxidation		SOH
sp|Q86VP6|CAND1_HUMAN	1134	DIKMLTFLMLVRLSTLCPSAVLQRLDRLVEPLR	0.322596		oxidation		SOH
sp|Q86VP6|CAND1_HUMAN	1153	AVLQRLDRLVEPLRATCTTKVKANSVKQEFEKQ	0.450358				SOH
sp|Q86UW7|CAPS2_HUMAN	168	VFLKSDRVARMVQSGGCSANDFREVFKKNIEKR	0.376092
sp|Q86UW7|CAPS2_HUMAN	218	SWIAKYDAIYRGEEDLCKQPNRMALSAVSELIL	0.278772
sp|Q86UW7|CAPS2_HUMAN	806	IATPIPAEEVKKVVRKCLEKAALINYTRLTEYA	0.468267
sp|Q86UW7|CAPS2_HUMAN	919	PLFQLLNNFLRNDTLLCNGKFHKHLQEIFVPLV	0.412148
sp|Q86UW7|CAPS2_HUMAN	1097	TMFNVLVDAKKQSTKLCALDGGQEQQYHSKIDD	0.3683
sp|Q9KK62|CBH_BIFLN	2	***************MCTGVRFSDDEGNTYFGR	0.566618
sp|Q9UBN1|CCG4_HUMAN	4	*************MVRCDRGLQMLLTTAGAFAA	0.466103
sp|Q8WTZ4|CA5BL_HUMAN	103	WVLQSRPFLSSQVQENCKVTYFHRKHWVRIRPL	0.28588
sp|Q8WTZ4|CA5BL_HUMAN	155	PARIRVLREMVPEAWRCFPNRLPLLSNIRPDFS	0.307702
sp|P00736|C1R_HUMAN	89	YDYVKISADKKSLGRFCGQLGSPLGNPPGKKEF	0.351271
sp|P00736|C1R_HUMAN	220	YISSLEYPRSYPPDLRCNYSIRVERGLTLHLKF	0.334608
sp|P00736|C1R_HUMAN	268	YDQLQIYANGKNIGEFCGKQRPPDLDTSSNAVD	0.256832
sp|P00736|C1R_HUMAN	309	GDSRGWKLRYTTEIIKCPQPKTLDEFTIIQNLQ	0.468002
sp|P00736|C1R_HUMAN	451	WKNEQKGEKIPRCLPVCGKPVNPVEQRQRIIGG	0.373337
sp|P00736|C1R_HUMAN	620	AHDLRFVRLPVANPQACENWLRGKNRMDVFSQN	0.464467
sp|Q9D0M2|CDCA7_MOUSE	265	IIRPVEEVTEEEIRNICSNSREKIYNRSLGSTC	0.424291
sp|Q8TAL5|CI043_HUMAN	43	TIRRIERGHPRILGSSCKTPLDAEDKLPVLTVV	0.295363
sp|Q8TAL5|CI043_HUMAN	109	FHGRPPKGLPDKSLINCTNRLPKFPVLNLNETQ	0.478219
sp|Q8TAL5|CI043_HUMAN	128	RLPKFPVLNLNETQLPCPEDVRNMVVLWIPEET	0.379855
sp|Q8TAL5|CI043_HUMAN	230	QDLLKELLPGGKQTMLCPEMKIKLAMMKKNLPL	0.316032
sp|O93279|A4_TAKRU	63	NVQNGKWESDPSGTKSCLNTKEGILQYCQEVYP	0.573446
sp|O70127|ABCBB_RAT	405	AATNIFQTIDRQPVIDCMSGDGYKLDRIKGEIE	0.318275
sp|O70127|ABCBB_RAT	1270	EKTVQTALDKAREGRTCIVIAHRLSTIQNSDII	0.485955
sp|Q9UDR5|AASS_HUMAN	342	QSLLAPGKFSPAGVEGCPALPHKLVAICDISAD	0.660135
sp|Q9UDR5|AASS_HUMAN	534	EQLGKKYNINPVSMDICKQEEKLGFLVAKQDLV	0.47014
sp|Q9UDR5|AASS_HUMAN	566	VISLLPYVLHPLVAKACITNKVNMVTASYITPA	0.421204
sp|P29182|3NO28_NAJNA	3	**************LTCLNCPEVYCRRFQKCRN	0.361546
sp|P29182|3NO28_NAJNA	46	QRNLLGKRYEIGCAATCPEAKPREIVQCCSTDK	0.275086
sp|Q9GLN7|ACE_PANTR	155	NALLSNMSRIYSTAKVCLPNKTATCWSLDPDLT	0.572963
sp|Q9GLN7|ACE_PANTR	501	RYNFDWWYLRTKYQGICPPVTRNETHFDAGAKF	0.516036
sp|Q9GLN7|ACE_PANTR	1099	NYNQEWWSLRLKYQGLCPPVPRTQGDFDPGAKF	0.464359
sp|P0DSQ7|A49_VAR67	93	YQNELINSLDDNKIIDCIVNKFMSFYKDNLENI	0.32003
sp|P21589|5NTD_HUMAN	2	***************MCPRAARAPATLLLALGA	0.432133
sp|P21589|5NTD_HUMAN	51	NDVHSRLEQTSEDSSKCVNASRCMGGVARLFTK	0.450345
sp|P0DSR7|A21_VAR67	45	ERAAYVNYKRLNKNFICVDDRLFSYNFTTSGIK	0.532658
sp|P0DSR7|A21_VAR67	75	GIKAKVAVDNKNVPIPCSEINEVNNNKDVDTLY	0.636636
sp|P18328|3SIM2_DENAN	63	KRWHYVTPKNYDIIKGCAATCPKVDNNDPIRCC	0.416991
sp|P18328|3SIM2_DENAN	67	YVTPKNYDIIKGCAATCPKVDNNDPIRCCGTDK	0.566221
sp|Q9NUB1|ACS2L_HUMAN	29	LLGSLRGLSGQPARPPCGVSAPRRAASGPSGSA	0.455997
sp|Q9NUB1|ACS2L_HUMAN	151	PGTEVRITYRELLETTCRLANTLKRHGVHRGDR	0.376956
sp|Q9NUB1|ACS2L_HUMAN	213	AGFSAESLAGRINDAKCKVVITFNQGLRGGRVV	0.357951
sp|Q9NUB1|ACS2L_HUMAN	242	GRVVELKKIVDEAVKHCPTVQHVLVAHRTDNKV	0.483632
sp|P63910|ADD_STRA5	16	*MTQAVLKELAKAELHCHLDGSLSLPAIRKLAN	0.299384
sp|P63910|ADD_STRA5	140	LADAQKEFNIVARALVCGMRQSSHKTTKDIIKH	0.296265
sp|A6LHA9|ACKA_PARD8	8	*********MKILVLNCGSSSIKYKLFDMTSGE	0.746477
sp|A6LHA9|ACKA_PARD8	116	ASSVLINQDVINKVIECSDLAPLHNPANLKGVR	0.370597
sp|A6LHA9|ACKA_PARD8	192	RYGFHGTSHRYVSRRACEILGVPYEDQKIITAH	0.369104
sp|Q9BYX7|ACTBM_HUMAN	374	SKQEYDESGPSIVHRKCF***************	0.454234
sp|O18874|ALL2_CANLF	175	IGLHKDQIVVLSDDDRCQGSRD***********	0.380682
sp|Q96M93|ADAD1_HUMAN	540	EAKKELLEAGTYHAAKCMSASYQEAKCKLKSYL	0.414502
sp|Q9NFQ4|ALL22_GLYDO	8	*********GKMKFKDCGKGEVTELDITDCSGD	0.41229
sp|Q9NFQ4|ALL22_GLYDO	72	KVAGTPIQVPGLETDGCKFVKCPIKKGDPIDFK	0.281193
sp|Q9NFQ4|ALL22_GLYDO	117	KAEVTAELVGDHGVLACGRFGRQVE********	0.331541
sp|Q96SZ5|AEDO_HUMAN	18	PRDNMASLIQRIARQACLTFRGSGGGRGASDRD	0.333185
sp|Q96SZ5|AEDO_HUMAN	132	GMHGMLKVLYGTVRISCMDKLDAGGGQRPRALP	0.281577
sp|Q96SZ5|AEDO_HUMAN	183	PGVLRSRAEYTEASGPCILTPHRDNLHQIDAVE	0.522928
sp|Q96SZ5|AEDO_HUMAN	239	YRVLEPVRPKEASSSACDLPREVWLLETPQADD	0.580916
sp|Q8IUX7|AEBP1_HUMAN	385	KGEELEEEWTPTEKVKCPPIGMESHRIEDNQIR	0.519474
sp|Q8IUX7|AEBP1_HUMAN	581	HSYKDMRQLMKVVNEECPTITRTYSLGKSSRGL	0.419437
sp|A6NC57|ANR62_HUMAN	11	******MEVRGSFLAACRRRMATWRKNRDKDGF	0.391712
sp|A6NC57|ANR62_HUMAN	80	DLNDRDKKNRTALLLACAHGRPGVVADLVARKC	0.417368
sp|A6NC57|ANR62_HUMAN	96	CAHGRPGVVADLVARKCQLNLTDSENRTALIKA	0.46353
sp|A6NC57|ANR62_HUMAN	291	QDLEMTSEGEQERLEGCESSQPQVEEKMKKCRN	0.346692
sp|A6NC57|ANR62_HUMAN	482	TKSQSEHQNLQGKKKLCNLRFILQQQEEERIKA	0.28772
sp|A6NC57|ANR62_HUMAN	811	KKADNQEKTIINIQVKCEDTVEKLQAECRKLEE	0.561591
sp|A6NC57|ANR62_HUMAN	907	EAQSLKKKLGQMRSQVCMKLSMSTVTL******	0.303862
sp|Q85365|ARBH_VARV	171	GVRLATISFITELGKRCMNPVETIKMFTLLSHT	0.599264
sp|Q9QXJ1|APBB1_MOUSE	369	QEEEKLSQRNANPGIKCFAVRSLGWVEMTEEEL	0.580636
sp|Q9QXJ1|APBB1_MOUSE	397	TEEELAPGRSSVAVNNCIRQLSYHKNNLHDPMA	0.451856
sp|C1GD57|AMPP3_PARBD	273	RRLNMLIDAGAEYRNYCADITRVVPLSGKFSPE	0.458944
sp|P0CN91|ATG26_CRYNB	965	HEEIFIEFRSASRRKACIALLEERMEAVRLSGE	0.514046
sp|P0CN91|ATG26_CRYNB	1038	TSTSFLEFKPEPMKITCLTIGSRGDVQPYIALC	0.415381
sp|P0CN91|ATG26_CRYNB	1054	CLTIGSRGDVQPYIALCKGLQAEGHITKIATHG	0.344725
sp|P0CN91|ATG26_CRYNB	1371	IDSIDHGWLFPRIDAACHHGGAGTTGASLRAGI	0.350643
sp|A1AHS4|ASNA_ECOK1	51	PILSRVGDGTQDNLSGCEKAVQVKVKALPDAQF	0.49769
sp|Q0BVN0|AROC_GRABC	133	IRDYRGGGRSSARETACRVAAGEVARKILGAGI	0.297545
sp|Q0BVN0|AROC_GRABC	331	RDGQPVEVITKGRHDPCVGIRAVPVGEAMVACV	0.528846
sp|Q8IXJ9|ASXL1_HUMAN	55	EAEGLKEMRSGTSPLACLNAMLHSNSRGGEGLF	0.311819
sp|Q8IXJ9|ASXL1_HUMAN	387	LQQNVGQEEAEIKSGLCVPGESVRIQRGPATRQ	0.445388
sp|Q8IXJ9|ASXL1_HUMAN	594	RIKPPWVVKGQPTYQICPRIIPTTESSCRGWTG	0.527423
sp|Q8IXJ9|ASXL1_HUMAN	672	DEGGGRGSSSGDGGEACGHPEPRGGPSTPGKCT	0.507347
sp|Q8IXJ9|ASXL1_HUMAN	687	ACGHPEPRGGPSTPGKCTSDLQRTQLLPPYPLN	0.361741
sp|Q8IXJ9|ASXL1_HUMAN	730	SRARREDLPSLRKEESCLLQRATVGLTDGLGDA	0.506569
sp|Q8IXJ9|ASXL1_HUMAN	975	LWTVPSRGGSDSNGSYCQQVDIEKLKINGDSEA	0.271885
sp|Q8IXJ9|ASXL1_HUMAN	1182	SPSSLRALKEPLLPDSCETGTGLARIEATQAPG	0.412729
sp|Q8IXJ9|ASXL1_HUMAN	1204	LARIEATQAPGAPQKNCKAVPSFDSLHPVTNPI	0.473462
sp|Q8IXJ9|ASXL1_HUMAN	1537	AFCHDDCIGPSKLCVLCLVVR************	0.302106
sp|A0A2U8U2K9|ASL7_SARSH	339	GPADEAKAYFERLGFECPSRQTTPDFLTSMTFP	0.320479
sp|A0A2U8U2K9|ASL7_SARSH	792	GELQSGSTSIFHWRNVCYDIKIKGKPRRILDNV	0.329514
sp|A0A2U8U2K9|ASL7_SARSH	834	TALMGVSGAGKTTLLDCLADRRTGIGIITGEML	0.334467
sp|A0A2U8U2K9|ASL7_SARSH	1033	NSSTLVEYFERKAKHPCPPNANPAEWMLEAIGA	0.343687
sp|Q8IYS0|ASTRC_HUMAN	90	QFTHLPDTERLIADYACALQRDILLQGRLYLSE	0.251254
sp|Q8IYS0|ASTRC_HUMAN	396	RTMTYTIVLNSPLTGKCTAATEKQTLYKESREA	0.338861
sp|P84071|ASCL_ALLCG	3	**************YQCGQGG************	0.486898
sp|Q16720|AT2B3_HUMAN	29	PKPQQQRDVPQAGGFGCTLAELRTLMELRGAEA	0.342285
sp|Q16720|AT2B3_HUMAN	609	GFRLFSKGASEILLKKCTNILNSNGELRGFRPR	0.463651			succination
sp|Q16720|AT2B3_HUMAN	640	PRDRDDMVRKIIEPMACDGLRTICIAYRDFSAG	0.401507
sp|Q16720|AT2B3_HUMAN	647	VRKIIEPMACDGLRTICIAYRDFSAGQEPDWDN	0.260168
sp|Q16720|AT2B3_HUMAN	694	GIEDPVRPEVPEAIRKCQRAGITVRMVTGDNIN	0.328427
sp|O43861|ATP9B_HUMAN	262	IPSDMVFLRTSEKAGSCFIRTDQLDGETDWKLK	0.339468
sp|O43861|ATP9B_HUMAN	551	KSVSSRIHEAVKAIVLCHNVTPVYESRAGVTEE	0.313426
sp|O43861|ATP9B_HUMAN	775	GIKIWMLTGDKLETATCIAKSSHLVSRTQDIHI	0.452879
sp|O43861|ATP9B_HUMAN	1143	LYVLKYLRRKLSPPSYCKLAS************	0.537082
sp|P38445|AVR2B_RAT	49	NANWELERTNQSGLERCEGEQDKRLHCYASWRN	0.27376
sp|P38445|AVR2B_RAT	203	LKPLQLLEIKARGRFGCVWKAQLMNDFVAVKIF	0.262779
sp|P38445|AVR2B_RAT	474	IEECWDHDAEARLSAGCVEERVSLIRRSVNSST	0.291784
sp|P17735|ATTY_HUMAN	128	SIGFLSSREEIASYYHCPEAPLEAKDVILTSGC	0.287381
sp|P17735|ATTY_HUMAN	275	KYEPLATLSTDVPILSCGGLAKRWLVPGWRLGW	0.301194
sp|P17735|ATTY_HUMAN	320	EIRDGLVKLSQRILGPCTIVQGALKSILCRTPG	0.412986
sp|Q8A9U8|ATPD_BACTN	63	VLDNPVVSVKDKLALICTAADGNGESSREFVRF	0.452379
sp|Q5GSX1|ATPA_WOLTR	92	VVLGNDRDVKEGDTVKCSGDVMQVPVGHELLGR	0.336445
sp|Q5GSX1|ATPA_WOLTR	203	NQKKINDEVDENQKVYCVYVAIGQKISTVAKVV	0.398606
sp|Q13315|ATM_HUMAN	141	MDTVKDSSNGAIYGADCSNILLKDILSVRKYWC	0.294151
sp|Q13315|ATM_HUMAN	198	VHRVLVARIIHAVTKGCCSQTDGLNSKFLDFFS	0.326077
sp|Q13315|ATM_HUMAN	199	HRVLVARIIHAVTKGCCSQTDGLNSKFLDFFSK	0.380298
sp|Q13315|ATM_HUMAN	384	QSYTTTQRESSDYSVPCKRKKIELGWEVIKDHL	0.42691
sp|Q13315|ATM_HUMAN	564	TSIVPGTVKMGIEQNMCEVNRSFSLKESIMKWL	0.296513
sp|Q13315|ATM_HUMAN	620	PHLVLEKILVSLTMKNCKAAMNFFQSVPECEHH	0.295234
sp|Q13315|ATM_HUMAN	755	EAYKSELFQKAKSLMQCAGESITLFKNKTNEEF	0.268684
sp|Q13315|ATM_HUMAN	977	LPMEDVLELLKPLSNVCSLYRRDQDVCKTILNH	0.36458
sp|Q13315|ATM_HUMAN	1045	TKERKYIFSVRMALVNCLKTLLEADPYSKWAIL	0.410208
sp|Q13315|ATM_HUMAN	1177	VLSCSPICEKQALFALCKSVKENGLEPHLVKKV	0.316446
sp|Q13315|ATM_HUMAN	1423	ILSKSPDSYQKILLAICEQAAETNNVYKKHRIL	0.321068
sp|Q13315|ATM_HUMAN	1736	NTLVEDCVKVRSAAVTCLKNILATKTGHSFWEI	0.510527
sp|Q13315|ATM_HUMAN	2021	LLEIYRSIGEPDSLYGCGGGKMLQPITRLRTYE	0.442934
sp|Q13315|ATM_HUMAN	2323	LALSILKQMIKKLDASCAANNPSLKLTYTECLR	0.663539
sp|Q13315|ATM_HUMAN	2704	AEFRLAGGVNLPKIIDCVGSDGKERRQLVKGRD	0.466881
sp|Q13315|ATM_HUMAN	2753	TLLQRNTETRKRKLTICTYKVVPLSQRSGVLEW	0.489411
sp|Q13315|ATM_HUMAN	2801	DGAHKRYRPNDFSAFQCQKKMMEVQKKSFEEKY	0.44514
sp|Q0BUV5|BIOB_GRABC	34	LPFPELLFRAAAIHRACFDPREVQISTLLSIKT	0.401745
sp|Q3B7T3|BEAN1_HUMAN	7	**********MSFKRPCPLARYNRTSYFYPTFS	0.685181
sp|A7H632|BIOB_CAMJD	60	IVLEAKMAKKNEALGFCLVTAGLGLDDEKLEYV	0.282425
sp|A7H632|BIOB_CAMJD	77	LVTAGLGLDDEKLEYVCEAAKAVQKEVPNLLLI	0.45712
sp|A7H632|BIOB_CAMJD	95	AAKAVQKEVPNLLLIACNGMASVEQLKELKKAG	0.351921
sp|Q9Y6D5|BIG2_HUMAN	36	ADKEVKRPQHSQLRRACQVALDEIKAEIEKQRL	0.472478
sp|Q9Y6D5|BIG2_HUMAN	90	LACQSKSPRVVSTSLDCLQKLIAYGHITGNAPD	0.351221
sp|Q9Y6D5|BIG2_HUMAN	166	PHIEIHEGTILQTVRTCYNIYLASKNLINQTTA	0.290277
sp|Q9Y6D5|BIG2_HUMAN	566	GMTPLQELSLRKKGLECLVSILKCMVEWSKDLY	0.346936
sp|P0A3B2|BIPA_ECO27	537	GQIIGIHSRSNDLTVNCLTGKKLTNMRASGTDE	0.50403
sp|P50895|BCAM_HUMAN	125	RLVLAEAQVGDERDYVCVVRAGAAGTAEATARL	0.358107
sp|P50895|BCAM_HUMAN	237	TLYLRLRKDDRDASFHCAAHYSLPEGRHGRLDS	0.270939
sp|P50895|BCAM_HUMAN	337	NLTLEGVTRGQSGTYGCRVEDYDAADDVQLSKT	0.362151
sp|P50895|BCAM_HUMAN	473	PKADGSWREGDEVTLICSARGHPDPKLSWSQLG	0.402334
sp|P50895|BCAM_HUMAN	522	SLTLKVTSALSRDGISCEASNPHGNKRHVFHFG	0.55692
sp|P50895|BCAM_HUMAN	628	GASGGARGGSGGFGDEC****************	0.357663
sp|H9L427|BIPA_SALTY	537	GQIIGIHSRSNDLTVNCLTGKKLTNMRASGTDE	0.50403
sp|Q5PSV4|BRM1L_HUMAN	127	ENMQIRTKVAGIYRELCLESVKNKYECEIQASR	0.560279
sp|Q5PSV4|BRM1L_HUMAN	137	GIYRELCLESVKNKYECEIQASRQHCESEKLLL	0.295148
sp|Q5PSV4|BRM1L_HUMAN	275	GRLYYDGEWYIRGQTICIDKKDECPTSAVITTI	0.378529
sp|Q91X34|BAAT_MOUSE	310	EFYRTFQETADKDSKYCFPIEKAHGHFLFVVGE	0.492301
sp|P0CM45|BRO1_CRYNB	312	DAANALNEIVKAHATVCGEAKEQAVKDNDLIYH	0.628242
sp|Q6PJG6|BRAT1_HUMAN	28	LCAVLVDPRQPVADDTCLEKLLDWFKTVTEGES	0.289899
sp|Q6PJG6|BRAT1_HUMAN	246	SPWTEALWVRLSPRVACLLERDPIPAAHSFVDL	0.465449
sp|Q6PJG6|BRAT1_HUMAN	308	PTHMGPLALGILKLEHCPQALRTQAFQVLLQPL	0.461344				SOH
sp|Q7Z7M8|B3GN8_HUMAN	124	FASYPKDLRRFLLSAACRSFPQWLPGGGGSQVS	0.264836
sp|Q7Z7M8|B3GN8_HUMAN	236	NQTLKDLLLLAWLGRHCPTVSFVLRAQDDAFVH	0.306427
sp|Q7Z7M8|B3GN8_HUMAN	367	HPGFLTAWPADRTADHCAFRNLLLVRPLGPQAS	0.34571
sp|Q7Z7M8|B3GN8_HUMAN	397	QASIRLWKQLQDPRLQC****************	0.365946
sp|Q02337|BDH_BOVIN	115	LDSMKSDRLRTVQLNVCKSEEVDKAAEVIRSSL	0.38725
sp|Q02337|BDH_BOVIN	209	ISSMMGRMANVARSPYCITKFGVEAFSDCLRYE	0.457789
sp|Q02337|BDH_BOVIN	289	YGRKYFDEKVARMESYCTSGSTDTSPVIKAVTH	0.28714
sp|A4HUV2|BOP1_LEIIN	602	AGIVVKIAMHAKVKKFCFHIKGDYLCALCPKDH	0.396628
sp|A4HUV2|BOP1_LEIIN	636	KYRQTIMLQLSKRKVFCPFRKFSEVVTDCRFHP	0.294811
sp|Q8BHT6|B3GLT_MOUSE	267	CGVPVKKEEIFVAVKTCKKFHADRIPIVKKTWA	0.299137
sp|Q96G97|BSCL2_HUMAN	395	LGSSEPAGGALRQRPTCSSS*************	0.475303
sp|Q9Y2C3|B3GT5_HUMAN	52	FVYKKDGNFLKLPDTDCRQTPPFLVLLVTSSHK	0.336489
sp|Q9Y2C3|B3GT5_HUMAN	284	PGGLRFSVCLFRRIVACHFIKPRTLLDYWQALE	0.408821
sp|Q9Y2C3|B3GT5_HUMAN	307	TLLDYWQALENSRGEDCPPV*************	0.359384
sp|Q9Z2E9|BSCL2_MOUSE	380	SALAPETLGSLRQRPTCSSS*************	0.449163
sp|A7GBG3|BXF_CLOBL	960	KYFNKVNLNNEYTIIDCIRNNNSGWKISLNYNK	0.273348
sp|A7GBG3|BXF_CLOBL	1054	LGDIHVSDNILFKIVGCNDTRYVGIRYFKVFDT	0.520213
sp|Q8N143|BCL6B_HUMAN	177	PRRSEGHPDPPTESRSCSQGPPSPASPDPKACN	0.411976
sp|Q8N143|BCL6B_HUMAN	222	ASQAGSLVGERSSGQPCPQARLPSGDEASSSSS	0.546487
sp|Q8N143|BCL6B_HUMAN	267	GPQSRLSPTAATVQFKCGAPASTPYLLTSQAQD	0.292373
sp|Q8N143|BCL6B_HUMAN	414	HLRAHVLIHTGEKPYPCPTCGTRFRHLQTLKSH	0.262001
sp|P12538|CAPSP_ADE05	551	IGGVQRVTITDARRRTCPYVYKALGIVSPRVLS	0.596075
sp|Q5W0U4|BSPRY_HUMAN	74	RAEERAEELRNKIVDQCERLQLQSAAITKYVAD	0.33383
sp|Q5W0U4|BSPRY_HUMAN	121	AARELVIQRLSLVRSLCESEEQRLLEQVHGEEE	0.477257
sp|Q5W0U4|BSPRY_HUMAN	262	SDDRKTLTFSTKKSKACADGPERFDHWPNALAA	0.584568
sp|O43497|CAC1G_HUMAN	146	VEMVVKMVALGIFGKKCYLGDTWNRLDFFIVIA	0.471416
sp|O43497|CAC1G_HUMAN	1019	PDFFSPSLDGDGDRKKCLALVSLGEHPELRKSL	0.297716
sp|O43497|CAC1G_HUMAN	1199	LHRTASGRGSASEHQDCNGKSASGRLARALRPD	0.402272
sp|O43497|CAC1G_HUMAN	1455	FVCQGEDTRNITNKSDCAEASYRWVRHKYNFDN	0.268144
sp|O43497|CAC1G_HUMAN	2197	SRSHSKISKHMTPPAPCPGPEPNWGKGPPETRS	0.261216
sp|O43497|CAC1G_HUMAN	2246	PPGGQEEPPSPRDLKKCYSVEAQSCQRRPTSWL	0.303611
sp|O43497|CAC1G_HUMAN	2330	DPPESQGPRTPPSPGICLRRRAPSSDSKDPLAS	0.322077
sp|O00305|CACB4_HUMAN	146	EKYNNDWWIGRLVKEGCEIGFIPSPLRLENIRI	0.331295
sp|Q9NYF8|BCLF1_HUMAN	688	ERVFKEENQKGDKKLRCDSADLRHDIDRRRKER	0.325816				SOH
sp|Q8N4S0|CCD82_HUMAN	75	ESFENDEELDSNKGPDCNKTPGSERELNLSKIQ	0.299326
sp|Q8N4S0|CCD82_HUMAN	99	RELNLSKIQSEGNDSKCLINSGNGSTYEEETNK	0.428057
sp|P70343|CASP4_MOUSE	138	YPIKEANGRTRKALIICNTEFKHLSLRYGANFD	0.58113
sp|A5WUN7|CAM1B_DANRE	172	MMAYTVEMISIEKVVSCVKRFSTFSASKELPFD	0.274865
sp|A5WUN7|CAM1B_DANRE	441	LRQRQKKAQPAEESTACRNRSNSLTQEGHPRGS	0.279365
sp|A5WUN7|CAM1B_DANRE	937	GQKLNEEKEVSSKDDTCVDALRDRSKEAEEPEK	0.382613
sp|A5WUN7|CAM1B_DANRE	1307	RELIKQEYLRKKQLELCEEQEQPQPKPKTKPKK	0.43623
sp|A5WUN7|CAM1B_DANRE	1342	LKSVVKEEPSIDPLPKCPAANENLISAQSGSSL	0.320932
sp|Q9BWT7|CAR10_HUMAN	248	LAVDQLKLKVSRLEEECALLRRARGPPPGAEEK	0.282188
sp|Q9BWT7|CAR10_HUMAN	374	QEMEDLRLKHRTLQKDCDLYKHRMATVLAQLEE	0.278528
sp|Q9BWT7|CAR10_HUMAN	589	DSVWPLGKPEGLLARGCGLDFLNRSLAIRVSGR	0.362164
sp|Q9BWT7|CAR10_HUMAN	661	MEPREQRVEAAGLEGACLEAEAQQRTLLWNQGS	0.439354
sp|Q9BWT7|CAR10_HUMAN	725	IRANLTLPERADPHALCVKAQEILRLVDSAYKR	0.509119
sp|Q9BWT7|CAR10_HUMAN	779	VPNYQRAQQLLEVQEKCLPSSRHRGPRSNLKKR	0.387546
sp|Q9BWT7|CAR10_HUMAN	854	RPLLVSALRPVVLLPECLAPRLIRNLLDLPSSR	0.415301
sp|Q9BWT7|CAR10_HUMAN	920	LGSRIRAIQESVGKKHCLLELGARGVRELVQNE	0.512096
sp|Q9BWT7|CAR10_HUMAN	1026	QEQARLVWVECGSSRGCPSSSEA**********	0.253279
sp|Q9NVE4|CCD87_HUMAN	59	RILQSFPLAKLTVASLCSQVAKLLAGSGIAAGV	0.402486
sp|Q9NVE4|CCD87_HUMAN	199	LRAEQASGDVDKLHPVCPAGTFKLCPIPWPHST	0.564296
sp|Q9NVE4|CCD87_HUMAN	303	PSYPVAPTSRASPSPFCPELRRGQSMPSLREGW	0.470213
sp|Q9H9S4|CB39L_HUMAN	54	ASEEVSKSLQAMKEILCGTNEKEPPTEAVAQLA	0.362373
sp|O75808|CAN15_HUMAN	101	GVLPKPPAILGEPKGSCQEEAGPVRTAGLVATE	0.568522
sp|O75808|CAN15_HUMAN	123	PVRTAGLVATEPARGQCEDKDEEEKEEQEEEEG	0.433519
sp|O75808|CAN15_HUMAN	523	SVQQRVRQWLRPQEINCSVFRDHRATWSVFHTL	0.357672
sp|O75808|CAN15_HUMAN	578	AERPDLVERVMVTRSLCAEGAYQVRLCKDGTWT	0.483587
sp|P09668|CATH_HUMAN	272	TQDFMMYRTGIYSSTSCHKTPDKVNHAVLAVGY	0.484172
sp|Q8N126|CADM3_HUMAN	152	TGYKSSLREKDTATLNCQSSGSKPAARLTWRKG	0.505353
sp|Q8N126|CADM3_HUMAN	209	SVTFQVTREDDGASIVCSVNHESLKGADRSTSQ	0.3256
sp|Q8N126|CADM3_HUMAN	299	ALIFPFLNKSDSGTYGCTATSNMGSYKAYYTLN	0.257745
sp|Q81164|CAPSD_HBVC8	48	DTAAALYREALESPEHCSPHHTALRQAILCWVE	0.502126
sp|Q81164|CAPSD_HBVC8	183	RSQSPRRRRSQSRESQC****************	0.385266
sp|P47710|CASA1_HUMAN	8	*********MRLLILTCLVAVALARPKLPLRYP	0.375139
sp|P47710|CASA1_HUMAN	75	KQTDEIKDTRNESTQNCVVAEPEKMESSISSSS	0.529399
sp|P50983|CA1_CONIM	6	***********IVRRGCCSDPRCAWRCG*****	0.364731
sp|P50983|CA1_CONIM	7	**********IVRRGCCSDPRCAWRCG******	0.324921
sp|P54289|CA2D1_HUMAN	667	DNFEESGYTFIAPRDYCNDLKISDNNTEFLLNF	0.375983
sp|P54289|CA2D1_HUMAN	697	LNFNEFIDRKTPNNPSCNADLINRVLLDAGFTN	0.686213
sp|P54289|CA2D1_HUMAN	904	NISVYAFNKSYDYQSVCEPGAAPKQGAGHRSAY	0.44412
sp|P54289|CA2D1_HUMAN	1024	LMNTNLIFIMVESKGTCPCDTRLLIQAEQTSDG	0.342078
sp|P54289|CA2D1_HUMAN	1026	NTNLIFIMVESKGTCPCDTRLLIQAEQTSDGPN	0.325023
sp|P13994|CC130_HUMAN	336	RVPEEAAQDRPMSPGDCPPETTETPKCSSPRGQ	0.394603
sp|P36853|CAPSH_ADE09	219	NFYGGRALKKETKMKPCYGSFARPTNEKGGQAK	0.518645
sp|P36853|CAPSH_ADE09	444	NADWEKDPNLASRNQICKGNIFAMEINLQANLW	0.271528
sp|P36853|CAPSH_ADE09	750	FEIKRSVDGEGYNVAQCNMTKDWFLVQMLSHYN	0.385775
sp|P79175|C5AR1_GORGO	188	FLYRVVREEYFPPKVLCGVDYSHDKQRERAVAV	0.390778
sp|Q6DHV5|C2D2B_HUMAN	423	TSTPIKLQVQRIKMNKCDEQEQISEMSETEKKN	0.285672
sp|Q6DHV5|C2D2B_HUMAN	487	LRPQLSFTAELTSLSKCSLHEQKRRAKIQKLKY	0.312346
sp|Q6DHV5|C2D2B_HUMAN	647	NGLPLIPMPQSLRSSYCSMLRNVDARSVPGIPW	0.312093
sp|Q6DHV5|C2D2B_HUMAN	888	IPTRKTTINGSLDMPTCLKSSISCLRHRETIKS	0.256257
sp|Q6DHV5|C2D2B_HUMAN	940	FQHTVYKTNTASGSHPCWNEEIKVDFVSPGHDY	0.413619
sp|Q6DHV5|C2D2B_HUMAN	1340	KVMEWRPKHPTHWNRQCTFILRQILPKLEFGIG	0.26945
sp|Q8R4H4|CBPA5_MOUSE	288	RNWKAGFGGNGSNKNPCSETYRGPAPESEPEVA	0.409354
sp|P0DN24|CC086_HUMAN	59	PQKKPPFQPRSVQEAPCSPQGPPAQRPALAPPS	0.429779
sp|P0DN24|CC086_HUMAN	88	APPSKPSLKDSGSRNPCPSAPTWARPKPEE***	0.465569
sp|Q5JVX7|CA141_HUMAN	71	ATSASKAISKIKEDKSCSITKSKMHVSFKCEPE	0.431942
sp|Q5JVX7|CA141_HUMAN	176	QLSKYRSVRKKSLLPLCFEDELKNPHAKIVNVS	0.324806
sp|Q5JVX7|CA141_HUMAN	251	ENIYPHKRTNFILERNCEILKSIIGNQSISLFK	0.462305
sp|Q5JVX7|CA141_HUMAN	369	AGKPTSIPTSSALPVKCYSKPFKYIYELNNVTP	0.530353
sp|P15086|CBPB1_HUMAN	245	KSRFWRKTRSTHTGSSCIGTDPNRNFDAGWCEI	0.410717
sp|P15086|CBPB1_HUMAN	398	TGRYGFLLPESQIRATCEETFLAIKYVASYVLE	0.464947
sp|Q9BRT8|CBWD1_HUMAN	310	IQNLLWEKNVRNKDNHCMEVIRLKGLVSIKDKS	0.344745
sp|O00585|CCL21_HUMAN	57	PAKVVRSYRKQEPSLGCSIPAILFLPRKRSQAE	0.310796
sp|O00585|CCL21_HUMAN	75	IPAILFLPRKRSQAELCADPKELWVQQLMQHLD	0.607291
sp|O00585|CCL21_HUMAN	103	MQHLDKTPSPQKPAQGCRKDRGASKTGKKGKGS	0.296869
sp|P13500|CCL2_HUMAN	59	ISVQRLASYRRITSSKCPKEAVIFKTIVAKEIC	0.267576
sp|P13500|CCL2_HUMAN	75	CPKEAVIFKTIVAKEICADPKQKWVQDSMDHLD	0.594375
sp|Q1L9C7|CA174_DANRE	16	*MRAKQTVVVSLGQRVCGAVSLNPPGVKSSVKK	0.532511
sp|Q1L9C7|CA174_DANRE	107	KKAPGERRGKENSAAKCTGLTSGSAEAKMEQSV	0.539464
sp|O89093|CCL20_MOUSE	3	**************MACGGKRLLFLALAWVLLA	0.633364
sp|O89093|CCL20_MOUSE	75	CDINAIIFHTKKRKSVCADPKQNWVKRAVNLLS	0.582281
sp|P14599|A4_DROME	2	***************MCAALRRNLLLRSLWVVL	0.577618
sp|P14599|A4_DROME	70	EGRWVTDLSKKTTGPTCLRDKMDLLDYCKKAYP	0.400844
sp|Q5VST6|AB17B_HUMAN	210	LTSGMRVAFPDTKKTYCFDAFPNIDKISKITSP	0.265622
sp|Q8N2K0|ABD12_HUMAN	15	**MRKRTEPVALEHERCAAAGSSSSGSAAAALD	0.43075
sp|Q8N2K0|ABD12_HUMAN	52	LKQNLRLTGPAAAEPRCAADAGMKRALGRRKGV	0.453217
sp|P29179|3NO25_NAJNA	3	**************LTCLICPEKYCNKVHTCLN	0.370161
sp|P53601|A4_MACFA	62	NVQNGKWDSDPSGTKTCIDTKEGILQYCQEVYP	0.505509
sp|P53601|A4_MACFA	291	TTTTTTESVEEVVREVCSEQAETGPCRAMISRW	0.452249
sp|P53601|A4_MACFA	300	EEVVREVCSEQAETGPCRAMISRWYFDVTEGKC	0.259094
sp|P42684|ABL2_HUMAN	82	DKTGGSSPEALHRPYGCDVEPQALNEAIRWSSK	0.337998
sp|P42684|ABL2_HUMAN	415	YLEKKNFIHRDLAARNCLVGENHVVKVADFGLS	0.570837
sp|P42684|ABL2_HUMAN	510	VYDLLEKGYRMEQPEGCPPKVYELMRACWKWSP	0.572989
sp|P42684|ABL2_HUMAN	728	LVPPKCYGGSFAQRNLCNDDGGGGGGSGTAGGG	0.371924
sp|P42684|ABL2_HUMAN	982	VTSSGDKDRPRRVKPKCAPPPPPVMRLLQHPSI	0.492133
sp|P12023|A4_MOUSE	62	NVQNGKWESDPSGTKTCIGTKEGILQYCQEVYP	0.532351
sp|P12023|A4_MOUSE	291	TTTTTTESVEEVVREVCSEQAETGPCRAMISRW	0.452249
sp|P12023|A4_MOUSE	300	EEVVREVCSEQAETGPCRAMISRWYFDVTEGKC	0.259094
sp|O08890|5HT1F_CAVPO	364	TIFNEDFKKAFQKLVRCQY**************	0.41226
sp|P30380|1B02_GORGO	283	KWAAVVVPSGEEERYTCHVQHEGLPKPLTLRWE	0.457859
sp|O75969|AKAP3_HUMAN	15	**MSEKVDWLQSQNGVCKVDVYSPGDNQAQDWK	0.266738
sp|O75969|AKAP3_HUMAN	108	GTPERLHFEMTHKEIPCQGPRAQLGNGSSVDEV	0.475984
sp|O75969|AKAP3_HUMAN	186	SLSKIASELVNETVSACSRNAAPDKAPGSGDRV	0.404746
sp|O75969|AKAP3_HUMAN	445	KLREKMYSEPKSEEETCAKTLGEHIIKEGLTLW	0.493711
sp|O75969|AKAP3_HUMAN	815	IQEKLLQLSAAAVDKGCSVGEVLQSVLRYEKER	0.498333
sp|Q9ESC8|AFF4_MOUSE	886	SSSKEAKEKAPNSSSNCPPSTPTSESSKPRRTK	0.520566
sp|Q5PJD4|AMPA_SALPA	198	AGIKAAKDLGNMPPNICNAAYLASQARQLADSY	0.418627
sp|Q5PJD4|AMPA_SALPA	452	DMANIGGRPGGAITAGCFLSRFTRKYNWAHLDI	0.376433
sp|Q8INB9|AKT1_DROME	163	ASTPSDFLLNNFTVRGCQIMTVDRPKPFTFIIR	0.283409
sp|Q8INB9|AKT1_DROME	283	EFLKVLGKGTFGKVILCREKATAKLYAIKILKK	0.286149
sp|Q8INB9|AKT1_DROME	411	LLLDKDGHIKVADFGLCKEDITYGRTTKTFCGT	0.283638
sp|P51881|ADT2_MOUSE	57	ASKQITADKQYKGIIDCVVRIPKEQGVLSFWRG	0.4427
sp|P51881|ADT2_MOUSE	160	DVGKAGAEREFKGLGDCLVKIYKSDGIKGLYQG	0.530546
sp|Q9NUS5|AP5S1_HUMAN	21	FLIHTLRAPNTEDTGLCRVLYSCVFGAEKSPDD	0.281837
sp|P05050|ALKB_ECOLI	203	HGIQPLKAGFHPLTIDCRYNLTFRQAGKKE***	0.309918
sp|O00203|AP3B1_HUMAN	893	MSGKGLAAHYFFPRQPCIFGDKMVSIQITLNNT	0.474487
sp|A8Z6D5|AROA_CAMC1	87	IITPPQKIKEPNEILECGNSGTAMRLFMGLLAA	0.684711
sp|A8Z6D5|AROA_CAMC1	147	MGAKIDGANNANNAPLCIRGTKFERFSFDSKIA	0.584173
sp|A8Z6D5|AROA_CAMC1	428	FAEILKKMGARVEDRAC****************	0.471271
sp|Q9D0J4|ARL2_MOUSE	102	GLIWVVDSADRQRMQDCQRELQSLLVEERLAGA	0.278937
sp|Q7Z6R9|AP2D_HUMAN	126	PTDFINLHNARALKSSCLDEQRRELGCLDAYRR	0.361795
sp|Q7Z6R9|AP2D_HUMAN	136	RALKSSCLDEQRRELGCLDAYRRHDLSLMSHGS	0.261014
sp|Q7Z6R9|AP2D_HUMAN	243	YKVTIAEVKRRLSPPECLNASLLGGILRRAKSK	0.467316
sp|Q7Z6R9|AP2D_HUMAN	308	LVEGEALHLARDFGYTCETEFPAKAVGEHLARQ	0.28027
sp|A2AV36|ANM7_DANRE	5	************MKTFCGRANPTTGALDWVEES	0.420246
sp|A2AV36|ANM7_DANRE	34	VEESEEYDYHQEIARSCYADMLHDKDRNEKYYE	0.247573
sp|A2AV36|ANM7_DANRE	105	FCYAIEVFKPMAQAASCIVERNGFSDKIKIINK	0.263349
sp|A2AV36|ANM7_DANRE	634	ISVSMGLTKAVSQEGACEWNPHRKQGVFFFRSA	0.36088
sp|Q9Y6B7|AP4B1_HUMAN	18	PYLGSEDVVKELKKALCNPHIQADRLRYRNVIQ	0.580974
sp|Q9Y6B7|AP4B1_HUMAN	144	GLRDKASYVRRVAVLGCAKMHNLHGDSEVDGAL	0.483035
sp|Q9Y6B7|AP4B1_HUMAN	179	ELYSLLRDQDPIVVVNCLRSLEEILKQEGGVVI	0.345439
sp|Q9Y6B7|AP4B1_HUMAN	285	VQTDVLVRVKGPLLAACSSESRELCFVALCHVR	0.638354
sp|Q9Y6B7|AP4B1_HUMAN	491	ELLTALLRLFLSRPAECQDMLGRLLYYCIEEEK	0.429926
sp|Q9Y6B7|AP4B1_HUMAN	534	YYRLLLVGIDEVKRILCSPKSDPTLGLLEDPAE	0.362007
sp|Q9Y6B7|AP4B1_HUMAN	578	TLVPVYGKAHWATISKCQGAERCDPELPKTSSF	0.254647
sp|Q9Y6B7|AP4B1_HUMAN	584	GKAHWATISKCQGAERCDPELPKTSSFAASGPL	0.278054
sp|Q95JN5|AT133_MACFA	67	PEWRVKATCVRAAIKDCDVVLLRTTDEFKMWFC	0.330185
sp|Q95JN5|AT133_MACFA	113	SSPKSMSNKLSNGHAVCLTENPTGENRHGISKY	0.428381
sp|Q95JN5|AT133_MACFA	168	TIHNFDFLKGLDEGVSCTSIYEKHSAGLTKGMH	0.348957
sp|Q95JN5|AT133_MACFA	361	GDELYNPETHKRHTLFCGTTVIQTRFYTGELVK	0.306302
sp|Q95JN5|AT133_MACFA	480	AGIVYAQRRLKKIGIFCISPQRINICGQL****	0.470953
sp|Q95JN5|AT133_MACFA	489	LKKIGIFCISPQRINICGQL*************	0.303323
sp|P15848|ARSB_HUMAN	155	TTHMVGKWHLGMYRKECLPTRRGFDTYFGYLLG	0.493021
sp|P15848|ARSB_HUMAN	521	YHKHSVPVYFPAQDPRCDPKATGVWGPWM****	0.496832
sp|Q8TF62|AT8B4_HUMAN	3	**************MFCSEKKLREVERIVKAND	0.469218
sp|Q8TF62|AT8B4_HUMAN	201	LGADISRLAGFDGIVVCEVPNNKLDKFMGILSW	0.380478
sp|Q8TF62|AT8B4_HUMAN	407	SDKTGTLTQNIMTFKRCSINGRIYGEVHDDLDQ	0.33266
sp|Q8TF62|AT8B4_HUMAN	734	QNLFGQNRNFSNGHVVCEKKQQLELDSIVEETI	0.383245
sp|P83607|BMTID_RHIMP	15	**AVDFSKVPTATAGPCKG**************	0.526138
sp|Q8VED2|BL1S4_MOUSE	209	AYEPPVLFRTEDHFPGCGDRPQL**********	0.465957
sp|P50747|BPL1_HUMAN	289	SKADQSEVKLSVLSSGCRYQEGPVRLSPGRLQG	0.270878
sp|Q2T704|BOPE_BURTA	131	YEATLCAIFSEAKDRFCMDPATRAGNVRPAFIA	0.36024
sp|A0SN38|BRA_AMOLO	70	LAANFLPKLFCKITKKC****************	0.299582
sp|O95817|BAG3_HUMAN	151	QSPLRGMPETTQPDKQCGQVAAAAAAQPPASHG	0.334457	carbonylation			SOH
sp|O95817|BAG3_HUMAN	179	PASHGPERSQSPAASDCSSSSSSASLPSSGRSS	0.33338	carbonylation		succination	SOH
sp|O95817|BAG3_HUMAN	373	PPSEKVEVKVPPAPVPCPPPSPGPSAVPSSPKS	0.465724
sp|Q9Y5Z6|B3GT1_HUMAN	326	EMHRIWNDMSSKKHLRC****************	0.419557
sp|Q6UWJ8|C16L2_HUMAN	99	EEPGHCVAQSEVVKEGCSIYNRSEACPAAHHHP	0.327463
sp|Q6UWJ8|C16L2_HUMAN	108	SEVVKEGCSIYNRSEACPAAHHHPTYEPKTVTT	0.38561
sp|Q9UKI2|BORG2_HUMAN	145	NSKQESFGPAKLPRLSCEPVMEEKAQEKSSLLE	0.436904
sp|P18640|BXC_CBCP	693	YSKVQERNEIIKTIDNCLEQRIKRWKDSYEWMM	0.427294
sp|P18640|BXC_CBCP	786	VKISEAMNNINKFIRECSVTYLFKNMLPKVIDE	0.525859
sp|B3VZU0|B1CYA_RANDY	61	EKRLLSLALAALPKLFCLIFKKC**********	0.317785
sp|B3VZU0|B1CYA_RANDY	67	LALAALPKLFCLIFKKC****************	0.340215
sp|P29413|CALR_DROME	4	*************MMWCKTVIVLLATVGFISAE	0.333404
sp|P29413|CALR_DROME	105	KPLVVQFSVKHEQNIDCGGGYVKLFDCSLDQTD	0.580229
sp|A6NCS6|CB072_HUMAN	111	AAAAARAIRSPLVFVLCRASSLAAREPRRRLRE	0.409496
sp|A6NCS6|CB072_HUMAN	244	FSWGPWSRRKNQDVAACRSSAQEDFQEPEEELP	0.434506
sp|A6NCS6|CB072_HUMAN	280	IFPNGDCDDLGRGSKACDGVVHTPAEPTGDSR*	0.285228
sp|Q9P1Z2|CACO1_HUMAN	110	GAQLYQFRYVNRQGQVCGQSPPFQFREPRPMDE	0.276465
sp|Q9P1Z2|CACO1_HUMAN	555	SEDESPEDMRLPPYGLCERGDPGSSPAGPREAS	0.288209
sp|P49913|CAMP_HUMAN	86	DPDTPKPVSFTVKETVCPRTTQQSPEDCDFKKD	0.320259
sp|P49913|CAMP_HUMAN	97	VKETVCPRTTQQSPEDCDFKKDGLVKRCMGTVT	0.309878
sp|P49913|CAMP_HUMAN	125	MGTVTLNQARGSFDISCDKDNKRFALLGDFFRK	0.267624
sp|Q8TC90|CCER1_HUMAN	104	WGGPWRPPPPGFWKFPCPVQVFRVYGLHPLCFC	0.266586
sp|Q8TC90|CCER1_HUMAN	295	EEEKKNDDEEEYDQEVCDAKEASEEEEEVEDEE	0.336984
sp|Q12864|CAD17_HUMAN	340	LEIHVKVKDINDNPPTCPSPVTVFEVQENERLG	0.407216
sp|Q6IMN6|CAPR2_HUMAN	262	LPSKELDYLIKFSKLTCPERNESLSVEDQMEQS	0.345963
sp|P17392|CAPSD_HBVB4	48	DTASALYREALESPEHCSPHHTALRQAILCWGE	0.515922
sp|P17392|CAPSD_HBVB4	183	RSQSPRRRRSQSRESQC****************	0.385266
sp|P58811|CA1A_CONTU	57	WRCCLIPACRRNHKKFCG***************	0.320674
sp|Q8A2I1|CABC2_BACTN	113	PQDAAIEFEFLKDGRKCASFPFGINFKGWRAAW	0.280369
sp|Q8A2I1|CABC2_BACTN	912	PQSLLPGGLLQRTDTSCLVMVRKESADKVLLTV	0.357271
sp|Q8A2I1|CABC2_BACTN	986	VTVTLKGRWKVAETPFCKVVSEDKKQTVLRFLC	0.498215
sp|Q9NZU7|CABP1_HUMAN	105	GPARDPGLPSRRLPGSCPATPQSSGDPSSRRPL	0.46007
sp|Q9NZU7|CABP1_HUMAN	143	REEGARGSQRVLPQAHCRPREALPAAASRPSPS	0.255736
sp|Q13938|CAYP1_HUMAN	3	**************MQCHRDLALSQALWGWQLS	0.498789
sp|Q13938|CAYP1_HUMAN	80	LTQGPAGRTLGQTQASCPEPRPSMDAVDATMEK	0.641505
sp|Q13938|CAYP1_HUMAN	101	PSMDAVDATMEKLRAQCLSRGASGIQGLARFFR	0.371283
sp|P17391|CAPSD_HBVB1	48	DTVSALYREALKSPEHCSPHHTALRQAILCWGE	0.593724
sp|P17391|CAPSD_HBVB1	183	RSQSPRRRRSQSRESQC****************	0.385266
sp|P02746|C1QB_HUMAN	181	PGLYYFTYHASSRGNLCVNLMRGRERAQKVVTF	0.444326
sp|P0DTP8|C1L_VAR67	47	HSALYYAIADNNMRLVCTLLNAGALKNLLENEF	0.312651
sp|Q66K79|CBPZ_HUMAN	22	PLLLLTVLVVAAARPGCEFERNPAGECHRPPAA	0.339774
sp|Q66K79|CBPZ_HUMAN	32	AAARPGCEFERNPAGECHRPPAADSATCVDLQL	0.30701
sp|Q66K79|CBPZ_HUMAN	43	NPAGECHRPPAADSATCVDLQLRTCSDAAYNHT	0.284964
sp|Q66K79|CBPZ_HUMAN	157	PYFLDCHRYFTREDEGCYDPLEKLRGGLEADEA	0.262335
sp|Q66K79|CBPZ_HUMAN	204	HSYAQMVRVLRRTASRCAHVARTYSIGRSFDGR	0.312758
sp|Q66K79|CBPZ_HUMAN	433	AYADVHPMMMDRSENRCGGNFLKRGSIINGADW	0.395707
sp|Q9BV19|CA050_HUMAN	110	KVLEDAHRDANLHHVACNIVKKPGNIYYLYKRE	0.389595
sp|A1AFX8|CCA_ECOK1	200	ALTTRNPQVFFQVLRDCGALRVLFPEIDALFGV	0.381516
sp|A1AFX8|CCA_ECOK1	254	MAAMLSPQVDVRFATLCHDLGKGLTPPELWPRH	0.29836
sp|A1AFX8|CCA_ECOK1	408	LTRRRIAAVAGWKEQRCPKPE************	0.385247
sp|Q8NEF3|CC112_HUMAN	290	AVEAWKKQKSIEMSMKCASQLKEEEEKEKKHQK	0.380893
sp|P15085|CBPA1_HUMAN	248	TNRMWRKTRSHTAGSLCIGVDPNRNWDAGFGLS	0.405434
sp|Q3SXR2|CC036_HUMAN	89	EWAAPHPEEQRRSPPACSQHTPPLPSTPTGPPP	0.264126
sp|Q9UPW5|CBPC1_HUMAN	179	LNLVKQNLQNHRLVLPCLQLLRVYSANSVNSVS	0.287832
sp|Q9UPW5|CBPC1_HUMAN	305	FIDANGMKILYNTSQECLAVRTLDPLVNTSSLI	0.361478
sp|Q9UPW5|CBPC1_HUMAN	769	VSGMRPGVAYRFNIINCEKSNSQFNYGMQPLMY	0.367161
sp|Q13112|CAF1B_HUMAN	6	***********MKVITCEIAWHNKEPVYSLDFQ	0.488165
sp|Q13112|CAF1B_HUMAN	283	YVFSRKNLKRPIAHLPCPGKATLAVRCCPVYFE	0.64598
sp|Q6AYK9|CDYL_RAT	16	*MGLGSSQPSTKEAEPCTLQEKEEHPVDDTRQQ	0.53157
sp|Q6AYK9|CDYL_RAT	506	ANEMLLSGRKLTAQEACGKGLVSQVFWPGTFTQ	0.663247
sp|Q6AYK9|CDYL_RAT	534	GTFTQEVMVRIKELASCNPIVLEESKALVRCNM	0.503604
sp|Q6AYK9|CDYL_RAT	562	VRCNMKMELEQANERECDALKKIWGSAQGMDSM	0.33892
sp|Q8NAS9|CE017_HUMAN	12	*****MPEPPTPSVGSCAARASRMSAAPCSRAP	0.547721
sp|Q8NAS9|CE017_HUMAN	24	SVGSCAARASRMSAAPCSRAPSPIDHPRAEECG	0.39869
sp|Q8NAS9|CE017_HUMAN	39	PCSRAPSPIDHPRAEECGRAARDWQAAPPAAPV	0.29654
sp|Q8NAS9|CE017_HUMAN	87	DMENLYVQLKLQSVGTCFNREELPSVLQWPQGE	0.43239
sp|Q07785|CDC2H_PLAFK	93	LVFEHLDQDLKKLLDVCEGGLESVTAKSFLLQL	0.298234
sp|G5EEI8|CHRD1_CAEEL	9	********MVDESKLQCYHKGCGLLFDPKENDN	0.413485
sp|G5EEI8|CHRD1_CAEEL	170	NNGCSTEFDGSKNKENCQHHPGAAIFHEGMKYW	0.314565
sp|A4FUN9|CAHM5_DANRE	97	CCLNPLKLCPRGNFVGCLKGLIKVLYGACVAPV	0.274064
sp|A4FUN9|CAHM5_DANRE	150	DEVAVIQIFCADKGSVCQDELHRVPCGKSTLPP	0.278923
sp|C5GEU5|CBPYA_AJEDR	416	AEVMKALGAEVSTYDSCNMDINRNFLFRGDWMK	0.283399
sp|D4AN26|CDO_ARTBC	113	WNPGKSSPIHDHANAHCVMKILHGSLKEHRYDW	0.310907
sp|D4AN26|CDO_ARTBC	141	HRYDWPEQDKINNGEACPLTVTKETILRENEVA	0.525912
sp|D4AN26|CDO_ARTBC	209	CSLFDEKTGKSHHIKQCTFFSNRGLKL******	0.402003
sp|A6LIG0|CH60_PARD8	63	HITKDGVTVAKEVELTCPFENMGAQLVKEVASK	0.288753
sp|A6LIG0|CH60_PARD8	274	ALATLVVNRLRGSLKICAVKAPGFGDRRKAMLE	0.447545
sp|A6LIG0|CH60_PARD8	484	KVKEGKGDFGYNARKDCFENLCEAGVIDPAKVT	0.253577
sp|Q86SI9|CEI_HUMAN	26	LRAVRAALTSTVPDLLCLLARGSPRGLASGRLP	0.271522
sp|Q5PHB3|CHBG_SALPA	220	MCHPAFVDNIIRQSAYCYPRLTELEVLTSASLK	0.475103
sp|P20138|CD33_HUMAN	101	ETQGRFRLLGDPSRNNCSLSIVDARRRDNGSYF	0.422988
sp|P20138|CD33_HUMAN	212	VLIITPRPQDHGTNLTCQVKFAGAGVTTERTIQ	0.534592
sp|P0DN86|CGB3_HUMAN	92	VCNYRDVRFESIRLPGCPRGVNPVVSYAVALSC	0.35987
sp|Q61003|CD6_MOUSE	54	DLEERLGIRLVNGSSRCSGSVKVLLESWEPVCA	0.45749
sp|Q61003|CD6_MOUSE	82	EPVCAAHWNRAATEAVCKALNCGDSGKVTYLMP	0.421718
sp|Q61003|CD6_MOUSE	87	AHWNRAATEAVCKALNCGDSGKVTYLMPPTSEL	0.47021
sp|Q61003|CD6_MOUSE	248	TEAYLWDCPGRPGDQYCGHKEDAGVVCSEHQSW	0.397157
sp|Q61003|CD6_MOUSE	349	EPALSTCSWRFNNSNLCSQSRAARVVCSGSQRH	0.301951
sp|Q61003|CD6_MOUSE	359	FNNSNLCSQSRAARVVCSGSQRHLNLSTSEVPS	0.317891
sp|Q61003|CD6_MOUSE	541	LEELHVSHIPAADPRPCVADVPSRGSQYHVRNN	0.476649
sp|Q61003|CD6_MOUSE	569	HVRNNSDSSTSSEEGYCNDPSSKPPPWNSQAFY	0.259823
sp|Q9Z0F4|CIB1_MOUSE	35	LTFLTKQEILLAHRRFCELLPPEQRTVEESLHT	0.366358
sp|Q9H8W2|CF155_HUMAN	12	*****MRPGSSPRAPECGAPALPRPQLDRLPAR	0.627094
sp|Q9H8W2|CF155_HUMAN	57	RWPAKEVGPRPQIPATCEPGKVCGASAGRRDAA	0.532791
sp|Q9H8W2|CF155_HUMAN	63	VGPRPQIPATCEPGKVCGASAGRRDAARPSRPR	0.474462
sp|Q14094|CCNI_HUMAN	272	LNSVYVYRPLKHTLVTCDKGVFRLHPSSVPGPD	0.317182
sp|Q8TBY9|CF251_HUMAN	373	DAKYLATISDAEVQKVCIWKWTLAVETPACTLE	0.279963
sp|Q8TBY9|CF251_HUMAN	567	KTPATPPTEKSNYPPDCTLKGDLFVLRNFIIGT	0.680139
sp|Q8TBY9|CF251_HUMAN	1109	SLFGLNPEGWKSEPATCSVKGSEICLEEELPDE	0.435163
sp|O43529|CHSTA_HUMAN	124	FVLDRIFVCDKHKILFCQTPKVGNTQWKKVLIV	0.323084
sp|F5HEF2|CEP2_HHV8P	323	VLLRMSDYFSRLLIYECKKLKALGLRSY*****	0.28785
sp|P32248|CCR7_HUMAN	346	GVKFRNDLFKLFKDLGCLSQEQLRQWSSCRHIR	0.269419
sp|P10191|CEP1_HHV11	69	PRFTATSIARVDVAPGCRLRFVLDGSPEDAYVT	0.431604
sp|P10191|CEP1_HHV11	93	GSPEDAYVTSEDYFKRCCGQSSYRGFAVAVLTA	0.263561
sp|P10191|CEP1_HHV11	94	SPEDAYVTSEDYFKRCCGQSSYRGFAVAVLTAN	0.276684
sp|Q9Y2V0|CDIN1_HUMAN	14	***MILTKAQYDEIAQCLVSVPPTRQSLRKLKQ	0.378194
sp|F5HAI6|CEP1_HHV8P	29	VPMSTHAPKTRESEEACPVYPHPVVPRLVLEVH	0.451572
sp|F5HAI6|CEP1_HHV8P	265	FTKHLENNEVLKYLKMCTLFKPPIVSLFSK***	0.312872
sp|Q6P2H3|CEP85_HUMAN	380	QVHSALLGRPAPFGDVCLLRLQELQRENTFLRA	0.30139
sp|Q8TCG1|CIP2A_HUMAN	6	***********MDSTACLKSLLLTVSQYKAVKS	0.540199
sp|Q8TCG1|CIP2A_HUMAN	445	DDTLKMHIAKILTTVKCTTLIEQQFTYGKIDLG	0.303002
sp|Q8TCG1|CIP2A_HUMAN	472	GKIDLGFGTKVADSELCKLAADVILKTLDLINK	0.537109
sp|Q8TCG1|CIP2A_HUMAN	615	ELIEKLQSGMVVKDQICDVRISDIMDVYEMKLS	0.402188
sp|Q8TCG1|CIP2A_HUMAN	752	QRNESTEKKNKDLQITCDSLNKQIETVKKLNES	0.431094
sp|Q4JVM3|ACNR_CORJK	111	WWGMRVEITRRVNIDPCFAAKWELDQLALRETV	0.384961
sp|Q6Q2Z6|ACOT5_MOUSE	354	ASKRLQAHGKEKPQIVCYPKTGHHIEPPYIPWS	0.513596
sp|Q1JF93|ACPS_STRPD	85	GRLTFQDIEILNDVRGCPILTKSPFKGNSFISI	0.393328
sp|P01089|2SS_RICCO	108	QQLQQCCNQVKQVRDECQCEAIKYIAEDQIQQG	0.260874
sp|P01089|2SS_RICCO	249	QDVFEAFRTAANLPSMCGVSPTECRF*******	0.339567
sp|P01089|2SS_RICCO	256	RTAANLPSMCGVSPTECRF**************	0.323898
sp|Q8WXI4|ACO11_HUMAN	143	IQVASEDLCSEKQWNVCKALATFVARREITKVK	0.253638
sp|Q8WXI4|ACO11_HUMAN	198	RMRLVYADTIKDLLANCAIQGDLESRDCSRMVP	0.268581
sp|Q8WXI4|ACO11_HUMAN	301	KAIVNNAFKHSMEVGVCVEAYRQEAETHRRHIN	0.315788
sp|Q8WXI4|ACO11_HUMAN	498	HTKPQDFVILASRRKPCDNGDPYVIALRSVTLP	0.493126
sp|O60516|4EBP3_HUMAN	7	**********MSTSTSCPIPGGRDQLPDCYSTT	0.67169
sp|Q9UNQ0|ABCG2_HUMAN	55	FHNICYRVKLKSGFLPCRKPVEKEILSNINGIM	0.442805
sp|Q9H0P0|5NT3A_HUMAN	73	KSSVRIKNPTRVEEIICGLIKGGAAKLQIITDF	0.474021				SOH
sp|P17516|AK1C4_HUMAN	170	CKDAGLAKSIGVSNFNCRQLEMILNKPGLKYKP	0.249719
sp|P17516|AK1C4_HUMAN	188	QLEMILNKPGLKYKPVCNQVECHPYLNQSKLLD	0.316339
sp|P17516|AK1C4_HUMAN	193	LNKPGLKYKPVCNQVECHPYLNQSKLLDFCKSK	0.26961
sp|P30838|AL3A1_HUMAN	217	AKHLTPVTLELGGKSPCYVDKNCDLDVACRRIA	0.476885				SOH
sp|P30838|AL3A1_HUMAN	428	SYHGKKSFETFSHRRSCLVRPLMNDEGLKVRYP	0.258583				SOH
sp|C0MEF7|ACKA_STRS7	386	AASKVKVLVVSTDEELCIARDVERLKQTIS***	0.436933
sp|P43464|AGGR_ECOLX	100	LKDALMIIYGISKVDACSCPNWSKGIIVADADD	0.346786
sp|P43464|AGGR_ECOLX	102	DALMIIYGISKVDACSCPNWSKGIIVADADDSV	0.341753
sp|Q7Z591|AKNA_HUMAN	651	FDPRRELEAEIYRLGSCLEELKEHIDQTQQEPE	0.396541
sp|Q7Z591|AKNA_HUMAN	706	LPAPSGQAPMPAIKTSCPEPATTTAAASTGPCP	0.258482
sp|Q7Z591|AKNA_HUMAN	818	AATPGKAEATRVLPRQCPVQAEKSHGAPLEEAT	0.562542
sp|Q7Z591|AKNA_HUMAN	1078	TIPSFLLTRAGRDQAICELQEEVSRLRLRLEDS	0.347712
sp|Q7Z591|AKNA_HUMAN	1241	HVLSPKAVPKGNGTVSCPHCRPIRTQDAGGAVT	0.357655
sp|Q7Z591|AKNA_HUMAN	1244	SPKAVPKGNGTVSCPHCRPIRTQDAGGAVTGDP	0.261832
sp|Q9BT22|ALG1_HUMAN	194	AKWYEKFFGRLSHLNLCVTNAMREDLADNWHIR	0.287186
sp|Q9Z0F8|ADA17_MOUSE	184	KSEDIKDFSRLQSPKVCGYLNADSEELLPKGLI	0.266613
sp|Q9Z0F8|ADA17_MOUSE	225	VRRVKRRAEPNPLKNTCKLLVVADHRFYKYMGR	0.636786
sp|Q9Z0F8|ADA17_MOUSE	365	GLAYVGSPRANSHGGVCPKAYYNPTVKKNIYLN	0.570425
sp|Q9Z0F8|ADA17_MOUSE	827	SFKLQRQSRVDSKETEC****************	0.412892
sp|A7GXA8|ARLY_CAMC5	52	REDIAGSKAHAKMLGACGILKPEEAAAIVAGLD	0.374637
sp|A7GXA8|ARLY_CAMC5	198	KRDFERFISSHERNNLCPLGSAALAGTPHPIRR	0.353249
sp|Q96PS8|AQP10_HUMAN	299	HKASELETPASAQMLECKL**************	0.448549
sp|A6KXB4|APTA_BACV8	69	KPKETKRDRFVMSKGHCVEALYVTLEAKGFISR	0.28999
sp|O43488|ARK72_HUMAN	16	*MLSAASRVVSRAAVHCALRSPPPEARALAMSR	0.457418
sp|O43488|ARK72_HUMAN	214	GMYNATTRQVETELFPCLRHFGLRFYAYNPLAG	0.311435
sp|O95626|AN32D_HUMAN	87	LSSNRASVGLEVLAEKCPNLIHLNLSGNKIKDL	0.471552
sp|Q92481|AP2B_HUMAN	262	YKVTVGEVQRRLSPPECLNASLLGGVLRRAKSK	0.453114
sp|Q92481|AP2B_HUMAN	364	SDLHSRKNMLLATKQLCKEFTDLLAQDRTPIGN	0.264552
sp|P20073|ANXA7_HUMAN	413	REFSGYVESGLKTILQCALNRPAFFAERLYYAM	0.550061
sp|C5JQ04|AMPP3_BLAGS	273	KKLNMLVDAGGEYRNYCADITRVFPLSGKFSAE	0.526177
sp|P0CM05|ARP6_CRYNB	52	RSRTEKRVYVGDEIDNCKDLSGIVYRRPFEKGM	0.395327
sp|C4JYG6|ARO1_UNCRE	103	QTKAEIEDWMLSRQPPCGRDTVIIALGGGVIGD	0.344853
sp|C4JYG6|ARO1_UNCRE	316	RHLGILKSVAVSRLVKCLASYGLPTSLKDSRVR	0.427652
sp|C4JYG6|ARO1_UNCRE	429	SISNRALVLAALGSGTCRIKNLLHSDDTEVMLS	0.295346
sp|C4JYG6|ARO1_UNCRE	542	SLRTNGAGIKYMETTGCLPLKIDASGGFAGGHI	0.404258
sp|C4JYG6|ARO1_UNCRE	684	LQGDARFAVDVLRPMGCEVNQSSFSTTVTGPRN	0.285806
sp|C4JYG6|ARO1_UNCRE	749	TSTTRIFGIANQRVKECNRIKAMKDELAKFGVT	0.34811
sp|Q5FYA8|ARSH_HUMAN	55	ASEGVRLTQHLAAASMCTPSRAAFLTGRYPIRS	0.323779
sp|Q5FYA8|ARSH_HUMAN	223	FFTSWYSSYGFTRRWNCILMRNHEIIQQPMKEE	0.297562
sp|Q8WWX0|ASB5_HUMAN	167	CAELLLEYGAKAQLESCLPSPTHEAASKGHHEC	0.323611
sp|Q9HD20|AT131_HUMAN	13	****MAAAAAVGNAVPCGARPCGVRPDGQPKPG	0.435724
sp|Q9HD20|AT131_HUMAN	18	AAAAAVGNAVPCGARPCGVRPDGQPKPGPQPRA	0.27254
sp|Q9HD20|AT131_HUMAN	336	GDIVSIGRSPQENLVPCDVLLLRGRCIVDEAML	0.39053
sp|Q9HD20|AT131_HUMAN	410	IPPQKATTGLKPVDSGCVAYVLRTGFNTSQGKL	0.492397
sp|Q9HD20|AT131_HUMAN	711	HLTHQQAREVKREALECSLKFVGFIVVSCPLKA	0.481421
sp|A0Q8E0|ATPG_FRATN	88	DVKRVGYIVTSTDRGLCGGLNINLFKHVLKEIK	0.555121
sp|A0Q8E0|ATPG_FRATN	116	LKEIKNNIEDRVGVDVCVIGSKAENFFAKLKDV	0.495339
sp|A0Q8E0|ATPG_FRATN	231	WDYIYERDIEEVLNALCIRYIEAQVRGAILENA	0.369279
sp|A0Q8E0|ATPG_FRATN	249	RYIEAQVRGAILENAACEQAARMMAMKNATDNA	0.512917
sp|Q2GER5|ATPA_NEOSM	44	EEIGEVISVKDGVVIACGLENAEFNEKVVFPNG	0.37825
sp|Q2GER5|ATPA_NEOSM	203	NQRDINKNLPDEKKLYCVYVAIGQKCSTVARIM	0.306793
sp|Q2GER5|ATPA_NEOSM	504	KSIIGDLASLSSALQGCKTTNA***********	0.332471
sp|Q5PLY8|BIOH_SALPA	110	THPERVQALVTVASSPCFSAREGWPGIKPEILG	0.352081
sp|A0Q638|BIOB_FRATN	36	QALEIHNKNFGNDIELCSLKSIKTGTCPEDCKY	0.26867
sp|A0Q638|BIOB_FRATN	90	ILAEAKNAKDAGSKRFCMGAAWKHIPKKDFDQV	0.278002
sp|A0Q638|BIOB_FRATN	121	QVAEIITEVKNLGLETCVTLGSINADEATKLKQ	0.316823
sp|A0Q638|BIOB_FRATN	313	DNFLLAKLGLKSNAELC****************	0.465823
sp|P0CM42|BTN1_CRYNJ	513	LEIALCRSQVDQGRTMCREL*************	0.318292
sp|P21004|B8_VACCC	207	ATEGFLEKITPWSSEVCLTPKKNVYTCAIRSKE	0.308062
sp|P21004|B8_VACCC	217	PWSSEVCLTPKKNVYTCAIRSKEDVPNFKDKMA	0.489458
sp|P03197|BLRF2_EBVB9	46	ESENKALKQQVLRGGACASSTSVPSAPVPPPEP	0.305804
sp|Q9BYV9|BACH2_HUMAN	37	TNILLGLNDQRKKDILCDVTLIVERKEFRAHRA	0.302805
sp|Q9BYV9|BACH2_HUMAN	112	TAKLLLSRENIREVIRCAEFLRMHNLEDSCFSF	0.296384
sp|Q9BYV9|BACH2_HUMAN	238	KDALTQYPRYKKYQLACTKNVYNASSHSTSGFA	0.374569
sp|Q9BYV9|BACH2_HUMAN	292	KSEPPSEENEEESITLCLSGDEPDAKDRAGDVE	0.304348
sp|Q9BYV9|BACH2_HUMAN	328	KQPSPAPTPTAPAGAACLERSRSVASPSCLRSL	0.385778
sp|Q9BYV9|BACH2_HUMAN	340	AGAACLERSRSVASPSCLRSLFSITKSVELSGL	0.37147
sp|Q9BYV9|BACH2_HUMAN	370	SGLPSTSQQHFARSPACPFDKGITQGDLKTDYT	0.578774
sp|Q9BYV9|BACH2_HUMAN	500	GLMADHLPGRMRPNTSCPVPIKVCPRSPPLETR	0.355983
sp|Q9BYV9|BACH2_HUMAN	507	PGRMRPNTSCPVPIKVCPRSPPLETRTRTSSSC	0.285685
sp|Q9BYV9|BACH2_HUMAN	830	RSQTVTVDFCQEMTDKCTTDEQPRKDYT*****	0.262575
sp|Q561X9|BDH2_DANRE	145	INMASVASSIKGVVNRCVYSTSKAAVIGLTKSV	0.470653
sp|Q1HVF8|BRRF2_EBVA8	162	KPGLYEIPRIIPHTKQCSPVNLLNMLVHKLVAL	0.35859
sp|Q1HVF8|BRRF2_EBVA8	339	QFLALPPAPSRKPQQTCSQLTSRGNESSRRNLG	0.469411
sp|Q1HVF8|BRRF2_EBVA8	368	RNLGQPGGTSPAVPPVCPIVSLTASGAKQNRGG	0.361183
sp|Q1HVF8|BRRF2_EBVA8	404	LHLAKPEETSPAVSPVCPIASPAASRSKQHCGV	0.505069
sp|Q9UL15|BAG5_HUMAN	360	TYIDLKEALEKRKLFACEEHPSHKAVWNVLGNL	0.623628
sp|Q9UL15|BAG5_HUMAN	420	KQLLALDAVDPQGEEKCKAARKQAVRLAQNILS	0.268652
sp|P25440|BRD2_HUMAN	353	QHQSSKKGKLSEQLKHCNGILKELLSKKHAAYA	0.395454
sp|P25440|BRD2_HUMAN	706	TLKPSTLRELERYVLSCLRKKPRKPYTIKKPVG	0.284732
sp|Q9H694|BICC1_HUMAN	164	IGKGGNNIKKVMEETGCHIHFPDSNRNNQAEKS	0.376412
sp|Q6PGQ7|BORA_HUMAN	125	IVPSPWTDHEGKQLSQCHSSKCTNINSDSPVGK	0.282048
sp|Q6PGQ7|BORA_HUMAN	315	SPDASSGTNSNGITNPCIRSPYIDGCSPIKNWS	0.292361
sp|Q6PGQ7|BORA_HUMAN	324	SNGITNPCIRSPYIDGCSPIKNWSPMRLQMYSG	0.40604
sp|Q6PGQ7|BORA_HUMAN	526	DTVGAESYCKESDAQTCEVESKSQAFNMKQDHT	0.359855
sp|E7EKH7|B2SN4_SYLSP	66	KGVAKEAGLKLLNMAQCKLSGNC**********	0.461625
sp|E7EKH7|B2SN4_SYLSP	72	AGLKLLNMAQCKLSGNC****************	0.385423
sp|A3P6Z0|BOPE_BURP0	131	YEATLCAIFSEAKDRFCMDPATRAGNVRPAFIE	0.366202
sp|Q8BG28|B3GL2_MOUSE	100	TLSQRVLVKFIIGARGCEVPVEDREDPYSCRLL	0.612282
sp|Q8BG28|B3GL2_MOUSE	200	TEQEEALFIARFSPPSCGVQVNKLWYKPVEQFI	0.473809
sp|Q8BG28|B3GL2_MOUSE	493	QYSPEELSKLWELKELCGDPCQCEAKVR*****	0.271292
sp|Q8BG28|B3GL2_MOUSE	497	EELSKLWELKELCGDPCQCEAKVR*********	0.337196
sp|Q8BG28|B3GL2_MOUSE	499	LSKLWELKELCGDPCQCEAKVR***********	0.335639
sp|O43505|B4GA1_HUMAN	159	SSHCPDMRARVAMHLVCPSRYEAAVPDPREPGE	0.288099
sp|O43505|B4GA1_HUMAN	182	AVPDPREPGEFALLRSCQEVFDKLARVAQPGIN	0.466148
sp|O43505|B4GA1_HUMAN	415	QFKQELKAKYPNSPRRC****************	0.474065
sp|P0DSV9|B14_VAR67	83	DVRELVKNMPWDDVKDCVEIIRCYIPDEQKTIR	0.327601
sp|Q9N295|B3GT5_PANTR	52	FVYKKDGNFLKLPDTDCRQTPPFLVLLVTSSHR	0.339131
sp|Q9N295|B3GT5_PANTR	284	PGGLRFSVCRFRRIVACHFIKPRTLLDYWQ***	0.313722
sp|Q4L5M8|BSHC_STAHJ	3	**************MDCRVTHFKEKDSFISKLK	0.519473
sp|Q6WRU0|BST2_CRIGR	64	KANSEACRDGLRAQEECSNTTRLLQRQLTRSQD	0.282005
sp|Q6WRU0|BST2_CRIGR	92	TRSQDNLAQAEAQASTCNRTVVTLQDSLEKKVS	0.365042
sp|O43521|B2L11_HUMAN	12	*****MAKQPSDVSSECDREGRQLQPAERPPQL	0.422435
sp|O43521|B2L11_HUMAN	110	SGYFSFDTDRSPAPMSCDKSTQTPSPPCQAFNH	0.350408
sp|O95180|CAC1H_HUMAN	546	HFSHGSPRRPGPEPGACDTRLVRAGAPPSPPSP	0.376607
sp|O95180|CAC1H_HUMAN	580	RGPPDAESVHSIYHADCHIEGPQERARVAHAAA	0.247962
sp|O95180|CAC1H_HUMAN	1129	PPLGDQKPPASLRSSPCAPWGPSGAWSSRRSSW	0.334882
sp|O95180|CAC1H_HUMAN	1214	SLDPRPLRPAALPPTKCRDRDGQVVALPSDFFL	0.304917
sp|O95180|CAC1H_HUMAN	1287	AWALYLFSPQNRFRVSCQKVITHKMFDHVVLVF	0.257309
sp|O95180|CAC1H_HUMAN	1459	IFGILGVQLFKGKFYYCEGPDTRNISTKAQCRA	0.300942
sp|O95180|CAC1H_HUMAN	2191	AEPALGARRKKKMSPPCISVEPPAEDEGSARPS	0.454198
sp|O95180|CAC1H_HUMAN	2223	SAAEGGSTTLRRRTPSCEATPHRDSLEPTEGSG	0.570741
sp|O95180|CAC1H_HUMAN	2331	GDPPEKRRGLYLTVPQCPLEKPGSPSATPAPGG	0.338377
sp|Q10588|BST1_HUMAN	6	***********MAAQGCAASRLLQLLLQLLLLL	0.616811
sp|Q10588|BST1_HUMAN	67	CAEYRALLSPEQRNKNCTAIWEAFKVALDKDPC	0.348708
sp|Q13137|CACO2_HUMAN	163	QHNKELCKENQELKDSCISLQKQNSDMQAELQK	0.301799
sp|Q13137|CACO2_HUMAN	321	DENFDLSKRLSENEIICNALQRQKERLEGENDL	0.391288
sp|O57252|B1_VACCA	83	EEWKKSHNIKHVGLITCKAFGLYKSINVEYRFL	0.366971
sp|O57252|B1_VACCA	240	WLGGILPWTKISETKNCALVSATKQKYVNNTAT	0.507138
sp|Q9NWW7|CB042_HUMAN	133	VPSCLKAATQGVVENQCQHIKLAVNCQAEATPL	0.457435
sp|Q9NWW7|CB042_HUMAN	142	QGVVENQCQHIKLAVNCQAEATPLTLKSSVLNA	0.275082
sp|Q9NWW7|CB042_HUMAN	193	TGPLVQRITKNILVVKCKASQKHSLGYLHTSFV	0.279975
sp|Q95K40|CCD83_MACFA	33	PKEVKLPTSEALLDYQCQIKENAVERFMFQIKT	0.291623
sp|Q95K40|CCD83_MACFA	340	SIEDLQYVKTDKEENSCTEFGDTDMKYLLYEDE	0.419797
sp|Q06814|CALR_SCHMA	103	KTMVLQFTVKFDKTVSCGGAYIKLLGSDIDPKK	0.541517
sp|Q06814|CALR_SCHMA	161	IFNYKGKNHLIKKEIPCKDDLKTHLYTLIVNPN	0.273275
sp|P49069|CAMLG_HUMAN	123	GTQLGDKLDSFIKPPECSSDVNLELRQRNRGDL	0.506358
sp|P49069|CAMLG_HUMAN	196	NTTEEFDSFRIFRLVGCALLALGVRAFVCKYLS	0.287223
sp|O88338|CAD16_MOUSE	678	SPVPALTLSAGPSRHLCTPRQDYGVVVSGVSED	0.261882
sp|O15484|CAN5_HUMAN	4	*************MFSCVKPYEDQNYSALRRDC	0.432385
sp|O15484|CAN5_HUMAN	58	KGTPGPAVRWKRPKGICEDPRLFVDGISSHDLH	0.584488
sp|O15484|CAN5_HUMAN	150	VVIDDRLPTVNNQLIYCHSNSRNEFWCALVEKA	0.391607
sp|O15484|CAN5_HUMAN	246	ASIKAVTAADMEARLACGLVKGHAYAVTDVRKV	0.489291
sp|O15484|CAN5_HUMAN	377	GAWTLHEDPRQNRGGGCINHKDTFFQNPQYIFE	0.440474
sp|O15484|CAN5_HUMAN	404	PQYIFEVKKPEDEVLICIQQRPKRSTRREGKGE	0.372172
sp|O15484|CAN5_HUMAN	544	GLKDSPTGANSYVIIKCEGDKVRSAVQKGTSTP	0.428083
sp|P43235|CATK_HUMAN	318	WGNKGYILMARNKNNACGIANLASFPKM*****	0.579189
sp|P54635|CAPSD_LORDV	200	TPLRANNAGDDVFTVSCRVLTRPSPDFDFIFLV	0.277251
sp|P36849|CAPSH_ADE03	224	EKFGGRALKPATNMKPCYGSFARPTNIKGGQAK	0.551291
sp|P36849|CAPSH_ADE03	751	FEIKRTVDGEGYNVAQCNMTKDWFLVQMLANYN	0.416353
sp|B9EB69|CARB_MACCJ	182	VIVRPAFTMGGTGGGICHDEKELVEIVTNGLKY	0.347281
sp|B9EB69|CARB_MACCJ	204	LVEIVTNGLKYSPVTQCLIEKSIAGYKEIEYEV	0.574894
sp|B9EB69|CARB_MACCJ	1033	RDGFQIRRDSVDNGVPCLTSLDTARALLEVIES	0.355747
sp|Q9BXJ1|C1QT1_HUMAN	141	TGPKGQKGSMGAPGERCKSHYAAFSVGRKKPMH	0.33015
sp|Q86WR0|CCD25_HUMAN	83	VLMDCAHLVKANSIQGCKMNNVNVVYTPWSNLK	0.480259	carbonylation
sp|Q67815|CAPSD_HASV6	82	NKQLRKQGVTGPKPAICQKATATLGTIGSNTSG	0.472509
sp|Q67815|CAPSD_HASV6	384	YVYASYQDALSNKPALCTGSTSGSMRTRPAVMT	0.41691
sp|Q67815|CAPSD_HASV6	755	YKPRREPSNDLLAPSDCLATARSHACNETCQLS	0.308207
sp|Q67815|CAPSD_HASV6	768	PSDCLATARSHACNETCQLSGSRGHAE******	0.308484
sp|P0CW27|CC166_HUMAN	87	EENRLYASYVSARAQRCAKAIVRLDEQNRVDLA	0.364211
sp|Q28960|CBR1_PIG	26	VTGANKGIGFAIVRDLCRQFAGDVVLTARDVAR	0.301326
sp|Q28960|CBR1_PIG	122	QAELTMKTNFMGTRNVCTELLPLIKPQGRVVNV	0.482322
sp|Q28960|CBR1_PIG	150	RVVNVSSTEGVRALNECSPELQQKFKSETITEE	0.532866
sp|Q6P1W5|CA094_HUMAN	7	**********MRGGGGCVLALGGQRGFQKERRR	0.575223
sp|Q6P1W5|CA094_HUMAN	42	SGNGLPSSSALVAKGPCALGPFPRYIWIHQDTP	0.706419
sp|Q6P1W5|CA094_HUMAN	160	LEVPGSSPEGTRELAPCILAPPLVAGSNERPRA	0.346064
sp|Q6P1W5|CA094_HUMAN	321	PELPAQKRQLPVFAKICSKPKADPAVERHHLME	0.395376
sp|Q6P1W5|CA094_HUMAN	388	DAVGTASLTLPPKKPTCPAEKNLLYEFLGATKN	0.633846
sp|Q95JR0|CAGE1_MACFA	196	NEYFRQPPPRSPPLIHCSGETLKFPEKSLAKST	0.427162
sp|Q95JR0|CAGE1_MACFA	228	TAKESALNPSQPPSFVCKTAVPSKEIQNYGEIP	0.542
sp|Q95JR0|CAGE1_MACFA	328	LKHTNRKQEARIQELQCSNLYLEKRVKELQMKT	0.329996
sp|Q95JR0|CAGE1_MACFA	700	IAKEKAFQDHAIKVTDCDSDEAKSIRDVPTFLG	0.541682
sp|Q95JR0|CAGE1_MACFA	738	YHSLNEELDFLITKLGCLLESKESHCNRLIEEN	0.291819
sp|Q95JR0|CAGE1_MACFA	777	LGSLIKKVTSYEEIIECADQRLAISHSQIAHLE	0.371937
sp|Q9Y646|CBPQ_HUMAN	43	GISKRTFEEIKEEIASCGDVAKAIINLAVYGKA	0.523978
sp|Q8N8U2|CDYL2_HUMAN	288	NNALTPEIMKEVRRALCNAATDDSKLLLLSAVG	0.658031
sp|Q8N8U2|CDYL2_HUMAN	423	ANEMLFCGRKLTAQEACSRGLVSQVFWPTTFSQ	0.405979
sp|Q8N8U2|CDYL2_HUMAN	451	TTFSQEVMLRVKEMASCSAVVLEESKCLVRSFL	0.294311
sp|Q8N8U2|CDYL2_HUMAN	479	VRSFLKSVLEDVNEKECLMLKQLWSSSKGLDSL	0.289766
sp|Q5TB80|CE162_HUMAN	4	*************MANCSQEELDEEFEQFMKEL	0.410092
sp|Q5TB80|CE162_HUMAN	578	LIKPAALDKPAHKTESCLSTRKKSENPTETDSC	0.311991
sp|Q5TB80|CE162_HUMAN	1014	KIQYEQRLEQQEQLLACKLNQHDSPRIKALEKE	0.276326
sp|Q5TB80|CE162_HUMAN	1235	IASLKASHQREIEKLLCQNAVENSSSKVAELNR	0.485427
sp|Q6ZQR2|CFA77_HUMAN	29	RWRKQQQPVRRTVSQVCPPPRRPLTVADIRSGM	0.535122
sp|Q6ZQR2|CFA77_HUMAN	148	VPEAIGRWNVFKQQPTCPHELTRNYIAMNRGAV	0.557133
sp|Q6ZQR2|CFA77_HUMAN	305	PTEADRQRALKAHREECAVRQGTLRMGNYTHP*	0.370144
sp|Q5T0N1|CFA70_HUMAN	145	PVQGSPLETPRSSAKQCSLEVKVLVAEPLLTTA	0.521242
sp|Q5T0N1|CFA70_HUMAN	274	GELNHPEDSEFRNQAECIKKRIIWDLESRCYLD	0.429412
sp|Q5T0N1|CFA70_HUMAN	304	YLDPSAVVSFQKRIADCRLWPVEITRVPLVTIP	0.262177
sp|Q5T0N1|CFA70_HUMAN	377	FHVYPYLDSVVHEKTKCLLSLFRDIGHHLIHNN	0.343444
sp|Q5T0N1|CFA70_HUMAN	691	YGAFCLLTEDNIKAQECFQKALSLNQSHIHSLL	0.39151
sp|Q5T0N1|CFA70_HUMAN	985	KGHLYFLSGNHSEAKACYERTISFVVDASEMHF	0.279075
sp|A7H2F8|CH60_CAMJD	123	TAGANPIEVKRGMDKACEAIVAELKKLSREVKD	0.53325
sp|Q1DYR7|CG121_COCIM	139	HESVSKHLEHNIKALPCPFTEESLASMTDRARL	0.284308
sp|Q9HD42|CHM1A_HUMAN	44	AEQAKVKKALLQKNVECARVYAENAIRKKNEGV	0.497028
sp|Q5PHV8|ABDH_SALPA	66	NTFAEWGQTTPKARAECLLKLADSIEQNALEFA	0.455359
sp|Q5PHV8|ABDH_SALPA	89	SIEQNALEFARLESQNCGKPLHCVINDEIPAIV	0.299913
sp|Q5PHV8|ABDH_SALPA	168	LMMAAWKLAPALAAGNCVVIKPSEITPLTALKL	0.363859
sp|P21069|A51_VACCC	8	*********MDGVIVYCLNALVKHGEEINHIKN	0.291108
sp|Q98300|A28_MCV1	123	VDFTFGTADTSRVVNPCTDPNGAQAEDCAFLKS	0.250351
sp|Q98300|A28_MCV1	134	RVVNPCTDPNGAQAEDCAFLKSVL*********	0.254202
sp|Q6AZW2|A1A1A_DANRE	38	KSAPGQVKQAVLAALDCGYRHIDCAAAYSNERE	0.319302
sp|Q6AZW2|A1A1A_DANRE	45	KQAVLAALDCGYRHIDCAAAYSNEREVGEALTE	0.353727
sp|Q6AZW2|A1A1A_DANRE	94	SKLWNTKHHPDDVEEACRRSLSDLRLSYLDLYL	0.271179
sp|Q6AZW2|A1A1A_DANRE	259	TPAQVIIRWHIQRGVVCIPKSVTPSRIKQNIEV	0.393393
sp|C0M856|ACCD_STRE4	38	SVSRNVPEVPDELFAKCPACKHMIYQKDLGPAK	0.278533
sp|Q3TCJ1|ABRX2_MOUSE	224	AIYQVYNALQEKVQAVCADVEKSERVVESCQAE	0.516931
sp|Q3TCJ1|ABRX2_MOUSE	237	QAVCADVEKSERVVESCQAEVNKLRRQITQKKN	0.395558
sp|Q6TUQ9|A18_YMTV5	4	*************MSVCTEIDYKLYTELRKIAG	0.557075
sp|Q6TUQ9|A18_YMTV5	63	VGLFSSMDIPLKKPIECNTDNDIEHSKNVVMPN	0.51531
sp|Q6TUQ9|A18_YMTV5	135	ITTCYLLSVHKKKAVICLPNKMLINQWKRAIES	0.520313
sp|Q6TUQ9|A18_YMTV5	244	ICYFLTATPRRVNRIYCNDVINVSNSSDLKKYI	0.268507
sp|Q6TUQ9|A18_YMTV5	470	GFKKIDKKGNKQEFALCKAFNLQTR********	0.507795
sp|Q5JWF8|ACL10_HUMAN	85	QQALPRKAITHLKKRSCYVSLDFEGDLRDPARH	0.299711
sp|Q5JWF8|ACL10_HUMAN	235	LHSFQRRWITRAMYQECGSRLLYDVFN******	0.249507
sp|Q1JF94|ALR_STRPD	121	IASLDWIALARLEKKECQGLKVHVKVDSGMGRI	0.520958
sp|Q1JF94|ALR_STRPD	356	TTDIANYRNTINYEVLCLLSDRIPRIY******	0.369921
sp|Q8WV93|AFG1L_HUMAN	100	KAHELKDDEHQRRVIQCLQKLHEDLKGYNIEAE	0.327196
sp|Q8WV93|AFG1L_HUMAN	272	LQRANFVPFIAVLKEYCNTVQLDSGIDYRKREL	0.314144
sp|P81431|ADHX_OCTVU	10	*******TDATGKPIKCMAAIAWEAKKPLSIEE	0.303756
sp|P81431|ADHX_OCTVU	249	IGKKFGITEFVNPKKFCKSVQKVLGEMTDVGVD	0.273821
sp|P81431|ADHX_OCTVU	284	FECIGNVGVMRAALESCHKGWGTSVIVGVAAHG	0.31961
sp|P30837|AL1B1_HUMAN	386	VLGYIQLGQKEGAKLLCGGERFGERGFFIKPTV	0.39392			succination
sp|Q64640|ADK_RAT	159	ITGGNRSLVANLAAANCYKKEKHLDLENNWMLV	0.523315
sp|Q64640|ADK_RAT	335	VGGFLSQLVSNKPLTECIRAGHYAASVIIRRTG	0.356824
sp|Q64640|ADK_RAT	352	IRAGHYAASVIIRRTGCTFPEKPDFH*******	0.586414
sp|Q8DY10|ALR_STRA5	336	KYTIGTKVTLIGQQGSCNITTTDVAQKRQTINY	0.320806
sp|Q8DY10|ALR_STRA5	356	TTDVAQKRQTINYEVLCLLSDRIPRYY******	0.33489
sp|Q188A2|ARGB_CLOD6	156	GFVGEIKKVNVELIESCLKSGYISVIATIGVGD	0.557499
sp|Q188A2|ARGB_CLOD6	245	FEEGIITGGMIPKIEGCVDALNNGVNRVHILDG	0.463703
sp|E3SU11|ALL13_OLEEU	74	NVAPGTTQARIWGRTNCNFDANGRGQCETGDCN	0.502331
sp|E3SU11|ALL13_OLEEU	225	TSLFTCPAGTNYRVVFCP***************	0.259367
sp|Q9UJX3|APC7_HUMAN	131	KVRPSTGNSASTPQSQCLPSEIEVKYKMAECYT	0.475567	carbonylation
sp|Q9UJX3|APC7_HUMAN	259	YAFVHTGDNSRAISTICSLEKKSLLRDNVDLLG	0.442659
sp|Q9UJX3|APC7_HUMAN	329	YLLAREGRLEDVENLGCRLFNISDQHAEPWVVS	0.318174			succination	SOH
sp|Q9UJX3|APC7_HUMAN	509	EDGIALLRNALANQSDCVLHRILGDFLVAVNEY	0.581543		oxidation		SOH
sp|O14497|ARI1A_HUMAN	1827	KLPVKIVQKNDPFVVDCSDKLGRVQEFDSGLLH	0.505039
sp|O14497|ARI1A_HUMAN	1874	HFESKTELLPSRPHAPCPPAPRKHVTTAEGTPG	0.55375
sp|O14497|ARI1A_HUMAN	1983	LCTLLDWQDSLAKRCVCVSNTIRSLSFVPGNDF	0.276656
sp|O14497|ARI1A_HUMAN	2163	LYSTMVRFLSDRKNPVCREMAVVLLANLAQGDS	0.251207
sp|P0DN29|AMYG_ARTBC	417	KAYAEGYIEVAKKYTPCTGMLSEQFSRDNGTPL	0.411036
sp|P0DN29|AMYG_ARTBC	598	VVWEQDPNRKYTVPQTCGVSGAIKRDTWR****	0.609231
sp|Q9GLN8|ANGT_PANTR	171	ADRLQAILGVPWKDKNCTSRLDAHKVLSALQAV	0.308217
sp|O95782|AP2A1_HUMAN	171	LVAGDSMDSVKQSAALCLLRLYKASPDLVPMGE	0.348725
sp|O95782|AP2A1_HUMAN	225	SLITCLCKKNPDDFKTCVSLAVSRLSRIVSSAS	0.283056
sp|O95782|AP2A1_HUMAN	267	FVPAPWLSVKLLRLLQCYPPPEDAAVKGRLVEC	0.312364
sp|O95782|AP2A1_HUMAN	283	CYPPPEDAAVKGRLVECLETVLNKAQEPPKSKK	0.319467
sp|O95782|AP2A1_HUMAN	492	QGYAAKTVFEALQAPACHENMVKVGGYILGEFG	0.30585
sp|O95782|AP2A1_HUMAN	533	SSPPVQFSLLHSKFHLCSVATRALLLSTYIKFI	0.3492
sp|O95782|AP2A1_HUMAN	941	NFVGAGIIQTKALQVGCLLRLEPNAQAQMYRLT	0.44546
sp|Q92485|ASM3B_HUMAN	177	WLSNESIALFKKGAFYCEKLPGPSGAGRIVVLN	0.489623
sp|Q3ZCQ2|AX2R_HUMAN	8	*********MEQHFLGCVKRAWDSAEVAPEPQP	0.335399
sp|Q9UHI8|ATS1_HUMAN	198	QFHLLRRNRQGDVGGTCGVVDDEPRPTGKAETE	0.389416
sp|Q9UHI8|ATS1_HUMAN	586	DCSRTCGGGVQYTMRECDNPVPKNGGKYCEGKR	0.289197
sp|Q9UHI8|ATS1_HUMAN	626	LEDCPDNNGKTFREEQCEAHNEFSKASFGSGPA	0.331884
sp|Q9UHI8|ATS1_HUMAN	892	RRLVECRDINGQPASECAKEVKPASTRPCADHP	0.280505
sp|P51164|ATP4B_HUMAN	10	*******MAALQEKKTCGQRMEEFQRYCWNPDT	0.56949
sp|P51164|ATP4B_HUMAN	178	CSGLADPNFGFEEGKPCFIIKMNRIVKFLPSNG	0.334787
sp|P51164|ATP4B_HUMAN	201	RIVKFLPSNGSAPRVDCAFLDQPRELGQPLQVK	0.249569
sp|P51164|ATP4B_HUMAN	263	AAKLLNIPRNAEVAIVCKVMAEHVTFNNPHDPY	0.495263
sp|P53004|BIEA_HUMAN	204	ATLEERKEDQYMKMTVCLETEKKSPLSWIEEKG	0.301303				SOH
sp|P53004|BIEA_HUMAN	281	QFSEKELAAEKKRILHCLGLAEEIQKYCCSRK*	0.340084
sp|Q8N8U9|BMPER_HUMAN	128	GNTYNSSFKWQSPAEPCVLRQCQEGVVTESGVR	0.267334
sp|Q8N8U9|BMPER_HUMAN	497	VEVMAAPHLKGKLCGLCGNYNGHKRDDLIGGDG	0.275304
sp|Q8N8U9|BMPER_HUMAN	534	DVDDFAESWRVESNEFCNRPQRKPVPELCQGTV	0.259513
sp|Q8N8U9|BMPER_HUMAN	546	SNEFCNRPQRKPVPELCQGTVKVKLRAHRECQK	0.47158
sp|Q8N8U9|BMPER_HUMAN	682	PANLVLHKGRCIKPVLCPQR*************	0.411442
sp|O75815|BCAR3_HUMAN	64	HGTLPRKKKGPPPIRSCDDFSHMGTLPHSKSPR	0.285283
sp|O75815|BCAR3_HUMAN	261	SGAIIFQPINRTVPLRCLEEHYGTSPGQAREGS	0.311589
sp|O75815|BCAR3_HUMAN	321	RGNLLRNKEKSGSQPACLDHMQDRRALSLKAHQ	0.307647
sp|O75815|BCAR3_HUMAN	346	ALSLKAHQSESYLPIGCKLPPQSSGVDTSPCPN	0.249163
sp|O75815|BCAR3_HUMAN	400	SDARAGEALRGSDSQLCPKPPPKPCKVPFLKVP	0.507667
sp|O75815|BCAR3_HUMAN	408	LRGSDSQLCPKPPPKPCKVPFLKVPSSPSAWLN	0.250952
sp|O75815|BCAR3_HUMAN	449	NPAFATGCGRGAKLPSCAQGSHTELLTAKQNEA	0.344341
sp|Q9R016|BIR1E_MOUSE	124	SLRKLPIERHKKLRPECEFLQGKDVGNIGKYDI	0.570729
sp|Q9R016|BIR1E_MOUSE	576	PQALHTLITKNYLSRTCLLIAVHTNRVRDIRLY	0.418994
sp|Q9R016|BIR1E_MOUSE	1259	PTGDGIHQVAKLIVRQCLQLPCLRVLTFHDILD	0.325552
sp|Q9R016|BIR1E_MOUSE	1349	PGRIQVQATTVKALGQCVSRLPSLIRLHMLSWL	0.580857
sp|Q5AMT2|BGL2_CANAL	35	MGDLAFNLGVKNDDGTCKDVSTFEGDLDFLKSH	0.275737
sp|Q5AMT2|BGL2_CANAL	257	SVPSVENAADQWQKGICALRAWGINVAVYEAFD	0.266801
sp|Q5AMT2|BGL2_CANAL	305	HWGVWQSDKTLKYSIDCKFN*************	0.478754
[truncated: 90,252 more rows]
